# Supplementary material for: A facile synthesis of CF3-containing iminoisobenzofurans via copper-catalyzed oxygen trifluoromethylation–cyclization of o-vinyl-N-alkylamide
Source: Royal Society of Chemistry journal article supplement (doi:10.1039/d4ra07978g), 2025-01-01

## A facile synthesis of CF<sub>3</sub>-containing iminoisobenzofurans via copper-catalyzed oxygen trifluoromethylation– cyclization of o-Vinyl-N-alkylamide

Shuo Gao†<sup>a</sup>, Qiwan Zhou†<sup>a</sup>, Zilin Liu<sup>a</sup>, Shengxing Xie<sup>a</sup>, Di Yang<sup>a\*</sup>, Kaiyuan Zhang<sup>a\*</sup> and Zhenhua Zhang<sup>a\*</sup>

† These authors contributed equally.

<sup>a</sup> School of Chemistry and Chemical Engineering, Linyi University, Linyi 276000, P. R. China.

<sup>1</sup>H NMR (400 MHz) and <sup>13</sup>C NMR (100 MHz) spectra were recorded on a Bruker AVANCE 400 MHz spectrometer, with CDCl<sub>3</sub> as a solvent and tetramethylsilane as an internal standard. All reactions were carried out under an air atmosphere. Thin-layer chromatography (TLC) was conducted on silica gel 60 F254 plates (Yinlong) and column chromatography was performed over silica gel (mesh 300-400). High-resolution mass spectra were obtained on a Q-TOF6510 spectrograph (Agilent). Single-distilled water was used throughout all experiments; other reagents were commercially available and were used without further purification.

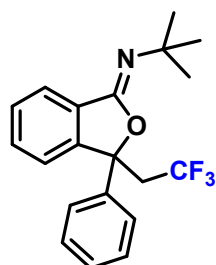

**3a**

(*E*)-N-(tert-butyl)-3-phenyl-3-(2,2,2-trifluoroethyl)isobenzofuran-1(3H)-imine

**3a** was obtained according the general procedure and purified by neutral alumina column (petroleum ether/ethyl acetate =15:1 to 10:1). Colorless oil (91% yield).

<sup>1</sup>H NMR (400 MHz, CDCl<sub>3</sub>) δ 7.83 - 7.76 (m, 1H), 7.54 - 7.44 (m, 3H), 7.43 - 7.34 (m, 4H), 7.34 - 7.28 (m, 1H), 3.33 - 3.21 (m, 1H), 3.15 - 3.01 (m, 1H), 1.48 (s, 9H).

<sup>13</sup>C NMR (101 MHz, CDCl<sub>3</sub>) 153.5, 146.2, 141.2, 131.2, 131.1, 129.1, 128.8, 128.2, 124.5, 124.4 (q, *J* = 274.7Hz, 1C), 124.1, 123.0, 121.8, 53.9, 43.5 (q, *J* = 22.22Hz, 1C), 30.2.

<sup>19</sup>F NMR (376 MHz, CDCl<sub>3</sub>) δ - 60.1.

HRMS (ESI) *m/z* calcd for C<sub>20</sub>H<sub>20</sub>F<sub>3</sub>NO [M+H]<sup>+</sup>: 348.1570, found:348.1569.

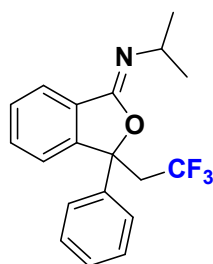

**3ba**

(*Z*)-*N*-isopropyl-3-phenyl-3-(2,2,2-trifluoroethyl)isobenzofuran-1(3*H*)-imine

**3ba** was obtained according the general procedure and purified by neutral alumina column (petroleum ether/ethyl acetate =15:1 to 10:1). Colorless oil (82% yield).

<sup>1</sup>H NMR (400 MHz, CDCl<sub>3</sub>) δ 7.84 (dt, *J* = 7.6, 1.1 Hz, 1H), 7.50 - 7.29 (m, 8H), 4.34 - 4.25 (m, 1H), 3.31 - 3.17 (m, 1H), 3.11 - 3.00 (m, 1H), 1.29 (ddd, *J* = 10.9, 6.4, 1.0 Hz, 6H).

<sup>13</sup>C NMR (101 MHz, CDCl<sub>3</sub>) δ 155.8, 147.0, 141.2, 131.5, 129.9, 129.3, 129.0, 128.4, 124.7 (q, *J* = 279.8 Hz, 1C), 124.5, 123.9, 122.1, 86.1, 47.8, 43.5 (q, *J* = 27.3 Hz, 1C), 24.2, 23.8.

<sup>19</sup>F NMR (376 MHz, CDCl<sub>3</sub>) δ - 60.2.

HRMS (ESI) *m/z* calcd for C<sub>19</sub>H<sub>18</sub>F<sub>3</sub>NO [M+H]<sup>+</sup>: 334.1413, found: 334.1408.

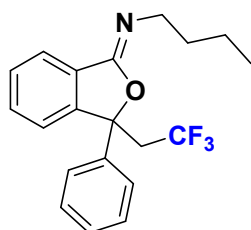

**3ca**

(*Z*)-*N*-butyl-3-phenyl-3-(2,2,2-trifluoroethyl)isobenzofuran-1(3*H*)-imine

**3ca** was obtained according the general procedure and purified by neutral alumina column (petroleum ether/ethyl acetate =15:1 to 10:1). Colorless oil (85% yield).

<sup>1</sup>H NMR (400 MHz, CDCl<sub>3</sub>) δ 7.82 (d, *J* = 7.5 Hz, 1H), 7.57 - 7.33 (m, 7H), 7.29 (t, *J* = 7.2 Hz, 1H), 3.76 - 3.55 (m, 2H), 3.16 (ddq, *J* = 76.6, 15.6, 10.0 Hz, 2H), 1.81 - 1.65 (m, 2H), 1.53 - 1.39 (m, 2H), 0.98 (t, *J* = 7.3 Hz, 3H).

<sup>13</sup>C NMR (101 MHz, CDCl<sub>3</sub>) δ 156.9, 147.1, 141.1, 131.4, 129.8, 129.2, 128.9, 128.3, 124.7 (q, *J* = 279.8 Hz, 1C), 124.4, 123.6, 122.0, 120.5, 86.1, 86.0, 47.4, 43.5 (q, *J* = 27.3 Hz, 1C), 33.0, 20.8, 14.0.

<sup>19</sup>F NMR (377 MHz, CDCl<sub>3</sub>) δ - 60.3.

HRMS (ESI) *m/z* calcd for C<sub>20</sub>H<sub>20</sub>F<sub>3</sub>NO [M+H]<sup>+</sup>: 348.1570, found:348.1567.

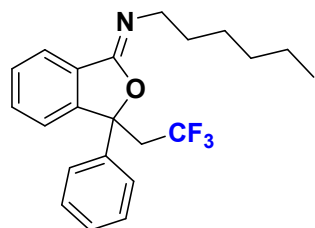

**3da**

(Z)-N-hexyl-3-phenyl-3-(2,2,2-trifluoroethyl)isobenzofuran-1(3H)-imine.

**3da** was obtained according the general procedure and purified by neutral alumina column (petroleum ether/ethyl acetate =15:1 to 10:1). Colorless oil (80% yield).

<sup>1</sup>H NMR (400 MHz, CDCl<sub>3</sub>) δ 7.83 (dt, *J* = 7.4, 1.1 Hz, 1H), 7.52 - 7.33 (m, 7H), 7.33 - 7.27 (m, 1H), 3.65 (td, *J* = 7.2, 3.7 Hz, 2H), 3.36 - 3.18 (m, 1H), 3.15 - 2.97 (m, 1H), 1.73 (p, *J* = 7.3 Hz, 2H), 1.54 - 1.28 (m, 6H), 0.96 - 0.83 (m, 3H).

<sup>13</sup>C NMR (101 MHz, CDCl<sub>3</sub>) δ 156.9, 147.0, 141.1, 131.4, 129.8, 129.2, 128.9, 128.3, 124.7 (q, *J* = 279.8Hz, 1C), 124.4, 123.6, 122.0, 86.1, 86.0, 86.0, 47.8, 43.5 (q, *J* = 27.3 Hz, 1C), 31.8, 30.9, 27.4, 22.7, 14.1.

<sup>19</sup>F NMR (377 MHz, CDCl<sub>3</sub>) δ - 60.3.

HRMS (ESI) *m/z* calcd for C<sub>22</sub>H<sub>24</sub>F<sub>3</sub>NO [M+H]<sup>+</sup>: 376.1883, found:376.1881.

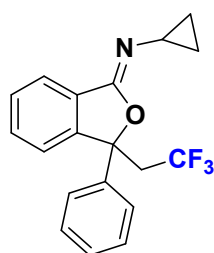

**3ea**

(Z)-N-cyclopropyl-3-phenyl-3-(2,2,2-trifluoroethyl)isobenzofuran-1(3H)-imine

**3ea** was obtained according the general procedure and purified by neutral alumina column (petroleum ether/ethyl acetate =15:1 to 10:1). White solid (95% yield), mp 132-136 °C.

<sup>1</sup>H NMR (400 MHz, CDCl<sub>3</sub>) δ 7.74 (dq, *J* = 7.6, 1.2 Hz, 1H), 7.56 - 7.50 (m, 2H), 7.48 - 7.35 (m, 5H), 7.34 - 7.28 (m, 1H), 3.62 - 3.46 (m, 1H), 3.28 (dq, *J* = 15.5, 10.0 Hz, 1H), 3.08 (dq, *J* = 15.5, 9.8 Hz, 1H), 0.93 - 0.75 (m, 4H).

<sup>13</sup>C NMR (101 MHz, CDCl<sub>3</sub>) δ 158.0, 146.8, 141.1, 131.3, 129.8, 129.3, 128.9, 128.4, 124.5, 123.4, 122.1, 86.3, 43.6 (q, *J*=27.3Hz), 29.9, 8.1, 8.0.

<sup>19</sup>F NMR (376 MHz, CDCl<sub>3</sub>) δ - 60.13.

HRMS (ESI) *m/z* calcd for C<sub>19</sub>H<sub>16</sub>F<sub>3</sub>NO [M+H]<sup>+</sup>: 332.1257, found:332.1252.

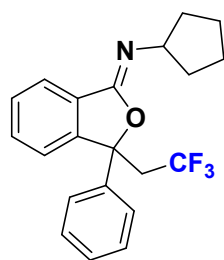

**3fa**

(Z)-N-cyclopentyl-3-phenyl-3-(2,2,2-trifluoroethyl)isobenzofuran-1(3H)-imine

**3fa** was obtained according the general procedure and purified by neutral alumina column (petroleum ether/ethyl acetate =15:1 to 10:1). Colorless oil (73% yield).

<sup>1</sup>H NMR (400 MHz, CDCl<sub>3</sub>) δ 7.86 - 7.79 (m, 1H), 7.52 - 7.34 (m, 7H), 7.33 - 7.26 (m, 1H), 4.40 (t, *J* = 7.1 Hz, 1H), 3.33 - 3.15 (m, 1H), 3.15 - 2.97 (m, 1H), 2.08 (dt, *J* = 7.7, 4.2 Hz, 2H), 1.83 (ddt, *J* = 8.7, 5.3, 2.7 Hz, 2H), 1.72 - 1.58 (m, 4H).

$^{13}\text{C}$  NMR (101 MHz,  $\text{CDCl}_3$ )  $\delta$  156.3, 147.0, 141.2, 131.33, 129.9, 129.1, 129.1, 129.1, 128.9, 128.3, 124.7 (q,  $J = 280.8\text{Hz}$ , 1C), 124.4, 123.8, 121.9, 120.5, 86.0, 86.0, 58.0, 43.5 (q,  $J = 27.3\text{Hz}$ , 1C), 34.5, 34.2, 24.6, 24.5.

$^{19}\text{F}$  NMR (377 MHz,  $\text{CDCl}_3$ )  $\delta$  - 60.3.

HRMS (ESI)  $m/z$  calcd for  $\text{C}_{21}\text{H}_{20}\text{F}_3\text{NO}$   $[\text{M}+\text{H}]^+$ : 360.1570, found:360.1567.

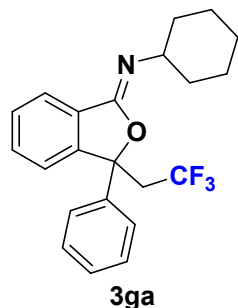

(*Z*)-*N*-cyclohexyl-3-phenyl-3-(2,2,2-trifluoroethyl)isobenzofuran-1(3H)-imine

**3ga** was obtained according the general procedure and purified by neutral alumina column (petroleum ether/ethyl acetate =15:1 to 10:1). Colorless oil (70% yield).

$^1\text{H}$  NMR (400 MHz,  $\text{CDCl}_3$ )  $\delta$  7.84 (d,  $J = 7.5$  Hz, 1H), 7.49 - 7.37 (m, 7H), 7.32 - 7.29 (m, 1H), 3.92 (tt,  $J = 10.4, 4.1$  Hz, 1H), 3.30 - 3.21 (m, 1H), 3.14 - 3.03 (m, 1H), 1.97 - 1.88 (m, 2H), 1.85 - 1.76 (m, 2H), 1.71 - 1.64 (m, 1H), 1.52 - 1.36 (m, 4H), 1.25 (q,  $J = 4.8$  Hz, 1H).

$^{13}\text{C}$  NMR (101 MHz,  $\text{CDCl}_3$ )  $\delta$  155.7, 147.0, 141.3, 134.5, 131.4, 130.0, 129.2, 129.2, 129.0, 128.4, 124.8 (q,  $J = 279.8\text{Hz}$ , 1C), 124.7, 124.5, 123.9, 122.0, 86.0, 56.0, 43.4 (q,  $J = 27.3\text{Hz}$ ), 34.3, 33.8, 26.0, 25.3, 25.3.

$^{19}\text{F}$  NMR (376 MHz,  $\text{CDCl}_3$ )  $\delta$  - 60.2.

HRMS (ESI)  $m/z$  calcd for  $\text{C}_{22}\text{H}_{22}\text{F}_3\text{NO}$   $[\text{M}+\text{H}]^+$ : 374.1726, found:374.1726.

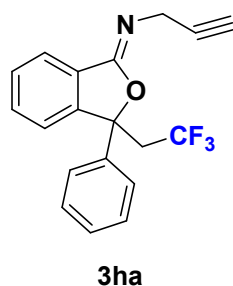

(*Z*)-3-phenyl-*N*-(prop-2-yn-1-yl)-3-(2,2,2-trifluoroethyl)isobenzofuran-1(3H)-imine

**3ha** was obtained according the general procedure and purified by neutral alumina column (petroleum ether/ethyl acetate =15:1 to 10:1). White solid (64% yield), mp 129-133 °C.

$^1\text{H}$  NMR (400 MHz,  $\text{CDCl}_3$ )  $\delta$  7.88 (dt,  $J = 7.5, 1.1$  Hz, 1H), 7.56 - 7.29 (m, 8H), 4.50 - 4.35 (m, 2H), 3.29 (dq,  $J = 15.6, 10.0$  Hz, 1H), 3.10 (dq,  $J = 15.6, 9.8$  Hz, 1H), 2.29 (d,  $J = 5.2$  Hz, 1H).

$^{13}\text{C}$  NMR (101 MHz,  $\text{CDCl}_3$ )  $\delta$  159.6, 147.3, 140.4, 132.1, 129.5, 129.2, 129.0, 128.8, 128.6, 124.6 (q,  $J = 280.8$  Hz, 1C), 124.5, 124.1, 122.1, 87.3, 82.2, 70.3, 43.5 (q,  $J = 28.3$  Hz, 1C), 36.9.

$^{19}\text{F}$  NMR(376 MHz,  $\text{CDCl}_3$ )  $\delta$  - 60.2.

**HRMS** (ESI)  $m/z$  calcd for  $C_{19}H_{14}F_3NO[M+H]^+$ : 330.1100, found:330.1098.

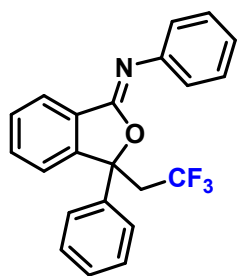

**3ia**

*(Z)*-N,3-diphenyl-3-(2,2,2-trifluoroethyl)isobenzofuran-1(3H)-imine

**3ia** was obtained according the general procedure and purified by neutral alumina column (petroleum ether/ethyl acetate =15:1 to 10:1). Colorless oil (86% yield).

**<sup>1</sup>H NMR** (400 MHz,  $CDCl_3$ )  $\delta$  8.04 - 7.93 (m, 1H), 7.61 - 7.48 (m, 3H), 7.48 - 7.27 (m, 9H), 7.16 (dd,  $J$  = 6.8, 1.8 Hz, 1H), 3.21 (ddq,  $J$  = 54.3, 15.6, 9.9 Hz, 2H).

**<sup>13</sup>C NMR** (101 MHz,  $CDCl_3$ )  $\delta$  156.2, 146.9, 146.3, 140.5, 132.2, 130.3, 129.6, 129.0, 129.0, 128.8, 124.7 (q,  $J$  = 279.8 Hz, 1C), 124.5, 123.7, 123.6, 122.3, 87.6, 43.4 (q,  $J$  = 28.3 Hz, 1C).

**<sup>19</sup>F NMR** (376 MHz,  $CDCl_3$ )  $\delta$  - 60.3.

**HRMS** (ESI)  $m/z$  calcd for  $C_{22}H_{16}F_3NO [M+H]^+$ : 368.1257, found: 368.1254.

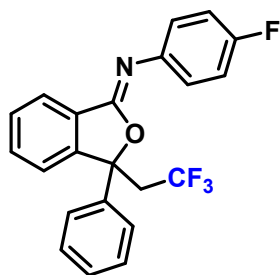

**3ja**

*(Z)*-N-(4-fluorophenyl)-3-phenyl-3-(2,2,2-trifluoroethyl)isobenzofuran-1(3H)-imine

**3ja** was obtained according the general procedure and purified by neutral alumina column (petroleum ether/ethyl acetate =15:1 to 10:1). White solid (71% yield), mp 114-118 °C.

**<sup>1</sup>H NMR** (400 MHz,  $CDCl_3$ )  $\delta$  8.00 - 7.93 (m, 1H), 7.59 - 7.27 (m, 10H), 7.10 - 6.99 (m, 2H), 3.30 (dq,  $J$  = 15.7, 9.9 Hz, 1H), 3.14 (dq,  $J$  = 15.6, 9.8 Hz, 1H).

**<sup>13</sup>C NMR** (101 MHz,  $CDCl_3$ )  $\delta$  160.5 (d,  $J$  = 242.4 Hz, 1C), 156.3, 146.8, 142.1, 140.3, 132.3, 130.2, 129.7, 129.1, 128.7, 125.4 (d,  $J$  = 9.1 Hz, 1C), 124.6 (q,  $J$  = 279.8 Hz, 1C), 124.5, 124.4, 122.3, 115.5 (d,  $J$  = 22.2Hz, 1C), 87.8, 43.4 (q,  $J$  = 27.8 Hz, 1C).

**<sup>19</sup>F NMR**(376 MHz,  $CDCl_3$ )  $\delta$  - 60.3, - 118.6.

**HRMS** (ESI)  $m/z$  calcd for  $C_{22}H_{15}F_4NO [M+H]^+$ : 386.1163, found: 386.1162.

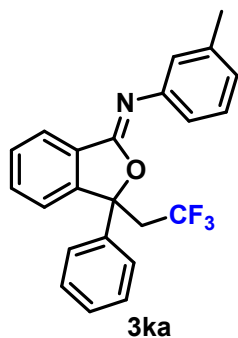

*(Z)*-3-phenyl-*N*-(*m*-tolyl)-3-(2,2,2-trifluoroethyl)isobenzofuran-1(3H)-imine

**3ka** was obtained according the general procedure and purified by neutral alumina column (petroleum ether/ethyl acetate =15:1 to 10:1). White solid (78% yield), mp 121-125 °C.

<sup>1</sup>H NMR (400 MHz, CDCl<sub>3</sub>) δ 8.00 - 7.95 (m, 1H), 7.59 - 7.44 (m, 5H), 7.38 - 7.27 (m, 4H), 7.25 - 7.21 (m, 2H), 6.98 (dtd, *J* = 7.1, 1.6, 0.8 Hz, 1H), 3.29 (dq, *J* = 15.6, 10.0 Hz, 1H), 3.20 - 3.10 (m, 1H), 2.39 (d, *J* = 0.7 Hz, 3H).

<sup>13</sup>C NMR<sup>1</sup> (101 MHz, CDCl<sub>3</sub>) δ 156.1, 147.0, 146.1, 140.5, 138.5, 132.2, 130.3, 129.6, 129.0, 128.6, 128.6, 125.2, 124.7 (q, *J* = 280.8 Hz, 1C) 124.6, 124.5, 122.2, 120.5, 87.6, 43.4(q, *J* = 28.3 Hz, 1C), 21.6.

<sup>19</sup>F NMR(376 MHz, CDCl<sub>3</sub>) δ - 60.2.

HRMS (ESI) *m/z* calcd for C<sub>23</sub>H<sub>18</sub>F<sub>3</sub>NO [M+H]<sup>+</sup>: 382.1413, found: 382.1416.

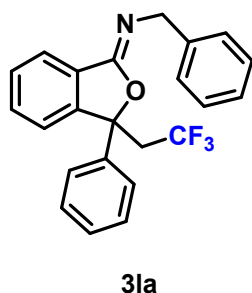

*(Z)*-*N*-benzyl-3-phenyl-3-(2,2,2-trifluoroethyl)isobenzofuran-1(3H)-imine

**3la** was obtained according the general procedure and purified by neutral alumina column (petroleum ether/ethyl acetate =15:1 to 10:1). Colorless oil (89% yield).

<sup>1</sup>H NMR (400 MHz, CDCl<sub>3</sub>) δ 7.90 - 7.85 (m, 1H), 7.52 - 7.26 (m, 13H), 4.88 (d, *J* = 3.1 Hz, 2H), 3.29 (dq, *J* = 15.6, 10.0 Hz, 1H), 3.11 (qd, *J* = 9.9, 5.4 Hz, 1H).

<sup>13</sup>C NMR (101 MHz, CDCl<sub>3</sub>) δ 157.9, 147.3, 140.8, 140.7, 131.8, 129.7, 129.4, 129.0, 128.5, 128.1, 126.7, 124.7 (q, *J* = 279.8 Hz, 1C) 124.5, 124.0, 122.1, 86.7, 51.5, 43.6 (q, *J* = 27.7 Hz, 1C).

<sup>19</sup>F NMR (376 MHz, CDCl<sub>3</sub>) δ - 60.1.

HRMS (ESI) *m/z* calcd for C<sub>23</sub>H<sub>18</sub>F<sub>3</sub>NO [M+H]<sup>+</sup>: 382.1413, found: 382.1415

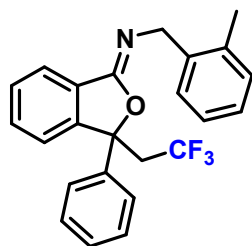

**3ma**

(*E*)-*N*-(2-methylbenzyl)-3-phenyl-3-(2,2,2-trifluoroethyl)isobenzofuran-1(3H)-imine **3ma** was obtained according the general procedure and purified by neutral alumina column (petroleum ether/ethyl acetate =15:1 to 10:1). Colorless oil (82% yield).

<sup>1</sup>H NMR (400 MHz, CDCl<sub>3</sub>) δ 7.89 (dt, *J* = 7.6, 1.1 Hz, 1H), 7.56 - 7.43 (m, 6H), 7.39 - 7.32 (m, 3H), 7.24 - 7.18 (m, 3H), 4.86 (s, 2H), 3.37 - 3.26 (m, 1H), 3.18 - 3.08 (m, 1H), 2.44 (s, 3H).

<sup>13</sup>C NMR (101 MHz, CDCl<sub>3</sub>) δ 157.7, 147.3, 140.9, 138.8, 136.4, 134.5, 131.7, 130.1, 129.4, 129.2, 129.0, 128.5, 128.4, 126.8, 126.3, 126.0, 124.7 (q, *J* = 280.8 Hz, 1C), 124.7, 124.5, 124.0, 122.1, 86.6, 49.5, 43.6 (q, *J* = 27.3 Hz, 1C), 19.4.

<sup>19</sup>F NMR (376 MHz, CDCl<sub>3</sub>) δ -60.1.

HRMS (ESI) *m/z* calcd for C<sub>24</sub>H<sub>20</sub>F<sub>3</sub>NO [M+H]<sup>+</sup>: 396.1570, found: 396.1569.

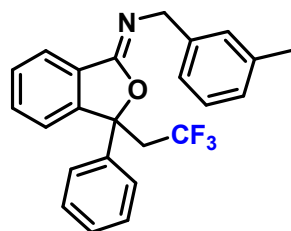

**3na**

(*E*)-*N*-(3-methylbenzyl)-3-phenyl-3-(2,2,2-trifluoroethyl)isobenzofuran-1(3H)-imine **3na** was obtained according the general procedure and purified by neutral alumina column (petroleum ether/ethyl acetate =15:1 to 10:1). Colorless oil (80% yield).

<sup>1</sup>H NMR (400 MHz, CDCl<sub>3</sub>) δ 7.89 (dt, *J* = 7.5, 1.0 Hz, 1H), 7.55 - 7.44 (m, 6H), 7.39 - 7.30 (m, 5H), 7.11 - 7.06 (m, 1H), 4.86 (s, 2H), 3.35 - 3.27 (m, 1H), 3.15 - 3.07 (m, 1H), 2.36 (s, 3H).

<sup>13</sup>C NMR (101 MHz, CDCl<sub>3</sub>) δ 157.9, 147.2, 140.9, 140.5, 138.1, 134.5, 131.8, 130.0, 129.4, 129.2, 129.0, 128.5, 128.4, 127.4, 125.2, 124.7 (q, *J* = 279.8 Hz, 1C), 124.7, 124.5, 124.0, 122.1, 86.6, 51.6, 43.6 (q, *J* = 27.27 Hz, 1C) 21.6.

<sup>19</sup>F NMR (376 MHz, CDCl<sub>3</sub>) δ -60.1.

HRMS (ESI) *m/z* calcd for C<sub>24</sub>H<sub>20</sub>F<sub>3</sub>NO [M+H]<sup>+</sup>: 396.1570, found: 396.1566.

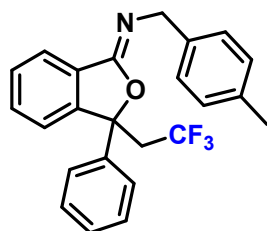

**3oa**

(*Z*)-*N*-(4-methylbenzyl)-3-phenyl-3-(2,2,2-trifluoroethyl)isobenzofuran-1(3H)-imine

**30a** was obtained according the general procedure and purified by neutral alumina column (petroleum ether/ethyl acetate =15:1 to 10:1). Colorless oil (85% yield).

<sup>1</sup>H NMR (400 MHz, CDCl<sub>3</sub>) δ 7.88 (dt, *J* = 7.4, 1.0 Hz, 1H), 7.56 - 7.44 (m, 5H), 7.41 - 7.32 (m, 5H), 7.18 (d, *J* = 7.7 Hz, 2H), 4.85 (d, *J* = 3.6 Hz, 2H), 3.35 - 3.26 (m, 1H), 3.19 - 3.06 (m, 1H), 2.36 (s, 3H).

<sup>13</sup>C NMR (101 MHz, CDCl<sub>3</sub>) δ 157.7, 147.2, 140.9, 137.7, 136.2, 134.5, 131.7, 129.8, 129.4, 129.2, 129.0, 128.9, 128.5, 128.1, 126.3, 124.7 (q, *J* = 279.8 Hz, 1C), 124.7, 124.5, 124.0, 122.1, 86.6, 51.3, 43.6 (q, *J* = 28.3 Hz, 1C), 21.2.

<sup>19</sup>F NMR (376 MHz, CDCl<sub>3</sub>) δ - 60.1.

HRMS (ESI) *m/z* calcd for C<sub>24</sub>H<sub>20</sub>F<sub>3</sub>NO [M+H]<sup>+</sup>: 396.1570, found: 396.1574.

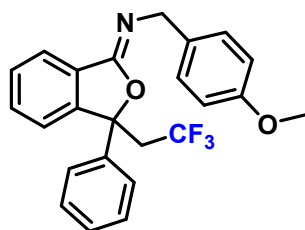

**3pa**

(*Z*)-*N*-(4-methoxybenzyl)-3-phenyl-3-(2,2,2-trifluoroethyl)isobenzofuran-1(3H)-imine

**3pa** was obtained according the general procedure and purified by neutral alumina column (petroleum ether/ethyl acetate =15:1 to 10:1). Colorless oil (77% yield).

<sup>1</sup>H NMR (400 MHz, CDCl<sub>3</sub>) δ 7.90 - 7.83 (m, 1H), 7.53 - 7.30 (m, 10H), 6.91 (dq, *J* = 8.6, 2.4 Hz, 2H), 4.99 - 4.67 (m, 2H), 3.82 (s, 3H), 3.30 (dtd, *J* = 15.9, 10.9, 9.4 Hz, 1H), 3.10 (dq, *J* = 15.5, 9.8 Hz, 1H).

<sup>13</sup>C NMR (101 MHz, CDCl<sub>3</sub>) δ 158.5, 157.7, 147.2, 140.9, 132.9, 131.7, 129.8, 129.4, 129.3, 128.9, 128.5, 124.7 (q, *J* = 279.8 Hz, 1C), 124.5, 124.0, 122.1, 113.9, 86.6, 55.4, 51.0, 43.6 (q, *J* = 27.3 Hz, 1C).

<sup>19</sup>F NMR (376 MHz, CDCl<sub>3</sub>) δ - 60.1.

HRMS (ESI) *m/z* calcd for C<sub>24</sub>H<sub>20</sub>F<sub>3</sub>NO<sub>2</sub> [M+H]<sup>+</sup>: 412.1519, found: 412.1520.

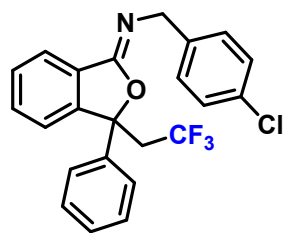

**3qa**

(*Z*)-*N*-(4-chlorobenzyl)-3-phenyl-3-(2,2,2-trifluoroethyl)isobenzofuran-1(3H)-imine

**3qa** was obtained according the general procedure and purified by neutral alumina column (petroleum ether/ethyl acetate =15:1 to 10:1). White solid (79% yield), mp 136-140 °C.

<sup>1</sup>H NMR (400 MHz, CDCl<sub>3</sub>) δ 7.86 (dt, *J* = 7.6, 1.1 Hz, 1H), 7.52 - 7.30 (m, 12H), 4.90 - 4.73 (m, 2H), 3.29 (dq, *J* = 15.6, 9.9 Hz, 1H), 3.17 - 3.05 (m, 1H).

<sup>13</sup>C NMR (101 MHz, CDCl<sub>3</sub>) δ 158.2, 147.2, 140.7, 139.2, 132.3, 131.9, 129.6, 129.5, 129.4, 129.0, 128.6, 128.5, 124.7 (q, *J* = 279.8 Hz, 1C), 124.5, 124.0, 122.2, 86.8,



50.8, 43.6 (q,  $J = 27.3\text{Hz}$ , 1C).

$^{19}\text{F}$  NMR (376 MHz,  $\text{CDCl}_3$ )  $\delta$  - 60.2.

HRMS (ESI)  $m/z$  calcd for  $\text{C}_{23}\text{H}_{17}\text{ClF}_3\text{NO}$   $[\text{M}+\text{H}]^+$ : 416.1024, found: 416.1020.

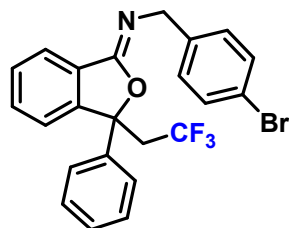

**3ra**

(*E*)-*N*-(4-bromobenzyl)-3-phenyl-3-(2,2,2-trifluoroethyl)isobenzofuran-1(3H)-imine  
**3ra** was obtained according the general procedure and purified by neutral alumina column (petroleum ether/ethyl acetate =15:1 to 10:1). White solid (75% yield), mp 142-145 °C.

$^1\text{H}$  NMR (400 MHz,  $\text{CDCl}_3$ )  $\delta$  7.87 (dt,  $J = 7.6, 1.0$  Hz, 1H), 7.55 - 7.45 (m, 6H), 7.42 - 7.35 (m, 6H), 4.87 - 4.76 (m, 2H), 3.35 - 3.26 (m, 1H), 3.18 - 3.08 (m, 1H).

$^{13}\text{C}$  NMR (101 MHz,  $\text{CDCl}_3$ )  $\delta$  158.3, 147.2, 140.7, 139.8, 134.5, 131.9, 131.5, 130.0, 129.8, 129.5, 129.2, 129.0, 126.3, 124.7, 124.7 (q,  $J = 279.8$  Hz, 1C), 124.5, 123.9, 122.9, 122.2, 120.4, 86.8, 50.8, 43.5 (q,  $J = 27.3\text{Hz}$ , 1C).

$^{19}\text{F}$  NMR (376 MHz,  $\text{CDCl}_3$ )  $\delta$  - 60.2.

HRMS (ESI)  $m/z$  calcd for  $\text{C}_{23}\text{H}_{17}\text{BrF}_3\text{NO}$   $[\text{M}+\text{H}]^+$ : 460.0518, found: 460.0517.

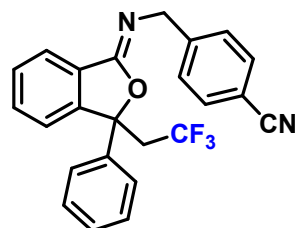

**3sa**

(*E*)-4-(((3-phenyl-3-(2,2,2-trifluoroethyl)isobenzofuran-1(3H)ylidene)amino)methyl)benzonitrile

**3sa** was obtained according the general procedure and purified by neutral alumina column (petroleum ether/ethyl acetate =15:1 to 10:1). White solid (78% yield), mp 133-137 °C.

$^1\text{H}$  NMR (400 MHz,  $\text{CDCl}_3$ )  $\delta$  7.88 (dt,  $J = 7.5, 1.1$  Hz, 1H), 7.66 - 7.33 (m, 12H), 4.96 - 4.85 (m, 2H), 3.35 - 3.25 (m, 1H), 3.12 (dq,  $J = 15.6, 9.8$  Hz, 1H).

$^{13}\text{C}$  NMR (101 MHz,  $\text{CDCl}_3$ )  $\delta$  158.7, 147.2, 146.4, 140.5, 132.3, 132.1, 129.6, 129.4, 129.0, 128.7, 128.6, 124.7 (q,  $J = 279.8\text{Hz}$ , 1C), 124.4, 123.9, 123.3, 122.3, 119.4, 110.3, 87.1, 87.1, 51.0, 43.5 (q,  $J = 28.3\text{Hz}$ , 1C).

$^{19}\text{F}$  NMR (376 MHz,  $\text{CDCl}_3$ )  $\delta$  - 60.2.

HRMS (ESI)  $m/z$  calcd for  $\text{C}_{24}\text{H}_{17}\text{F}_3\text{N}_2\text{O}$   $[\text{M}+\text{H}]^+$ : 407.1366, found: 407.1366.

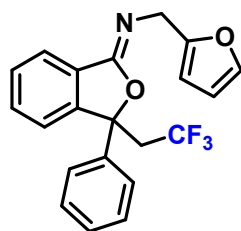

**3ta**

(*Z*)-*N*-(furan-2-ylmethyl)-3-phenyl-3-(2,2,2-trifluoroethyl)isobenzofuran-1(3H)-imine **3ta** was obtained according the general procedure and purified by neutral alumina column (petroleum ether/ethyl acetate =15:1 to 10:1). Yellow oil (72% yield).

<sup>1</sup>H NMR (400 MHz, CDCl<sub>3</sub>) δ 7.91 - 7.83 (m, 1H), 7.52 - 7.42 (m, 5H), 7.40 - 7.31 (m, 4H), 6.46 - 6.16 (m, 2H), 4.89 - 4.75 (m, 2H), 3.34 - 3.23 (m, 1H), 3.15 - 3.05 (m, 1H).

<sup>13</sup>C NMR (101 MHz, CDCl<sub>3</sub>) δ 158.9, 153.9, 147.3, 141.9, 140.6, 132.0, 129.4, 129.0, 128.6, 124.7 (q, *J* = 280.8 Hz, 1C), 124.5, 124.2, 122.1, 110.4, 106.7, 87.0, 44.7, 43.5 (q, *J* = 27.3 Hz, 1C).

<sup>19</sup>F NMR(376 MHz, CDCl<sub>3</sub>) δ - 60.2.

HRMS (ESI) *m/z* calcd for C<sub>21</sub>H<sub>16</sub>F<sub>3</sub>NO<sub>2</sub> [M+H]<sup>+</sup>: 372.1206, found: 372.1204.

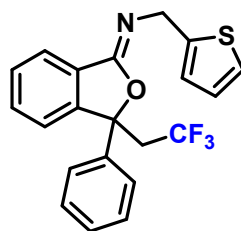

**3ua**

(*Z*)-3-phenyl-*N*-(thiophen-2-ylmethyl)-3-(2,2,2-trifluoroethyl)isobenzofuran-1(3H)-imine

**3ua** was obtained according the general procedure and purified by neutral alumina column (petroleum ether/ethyl acetate =15:1 to 10:1). Yellow oil (70% yield).

<sup>1</sup>H NMR (400 MHz, CDCl<sub>3</sub>) δ 7.87 (dt, *J* = 7.6, 1.0 Hz, 1H), 7.53 - 7.42 (m, 5H), 7.38 - 7.29 (m, 3H), 7.21 (dd, *J* = 5.1, 1.2 Hz, 1H), 7.06 (dq, *J* = 3.4, 1.1 Hz, 1H), 6.98 (dd, *J* = 5.1, 3.4 Hz, 1H), 5.11 - 4.96 (m, 2H), 3.35 - 3.24 (m, 1H), 3.09 (dq, *J* = 15.6, 9.9 Hz, 1H).

<sup>13</sup>C NMR (101 MHz, CDCl<sub>3</sub>) δ 158.3, 147.3, 144.0, 140.6, 131.9, 129.5, 129.5, 129.2, 129.0, 128.6, 126.8, 124.7, 124.7 (q, *J* = 124.7 Hz, 1C), 124.7, 124.5, 124.2, 124.1, 122.1, 87.0, 46.6, 43.6 (q, *J* = 27.3 Hz, 1C).

<sup>19</sup>F NMR (376 MHz, CDCl<sub>3</sub>) δ - 60.1.

HRMS (ESI) *m/z* calcd for C<sub>21</sub>H<sub>16</sub>SF<sub>3</sub>NO [M+H]<sup>+</sup>: 388.0977, found: 388.0977.

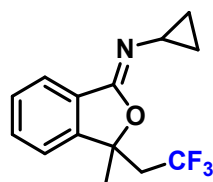

**3ab**

(Z)-N-cyclopropyl-3-methyl-3-(2,2,2-trifluoroethyl)isobenzofuran-1(3H)-imine  
**3ab** was obtained according the general procedure and purified by neutral alumina column (petroleum ether/ethyl acetate =15:1 to 10:1). Colorless oil (72% yield).

<sup>1</sup>H NMR (500 MHz, CDCl<sub>3</sub>) δ 7.74 (d, *J* = 7.8 Hz, 1H), 7.48 (td, *J* = 7.5, 1.2 Hz, 1H), 7.42 (td, *J* = 7.5, 1.1 Hz, 1H), 7.29 (d, *J* = 7.6 Hz, 1H), 3.37 (tt, *J* = 7.2, 3.7 Hz, 1H), 2.78 (dq, *J* = 15.5, 10.4 Hz, 1H), 2.71 - 2.62 (m, 1H), 1.72 (s, 3H), 0.84 - 0.79 (m, 2H), 0.78 - 0.73 (m, 2H).

<sup>13</sup>C NMR (101 MHz, CDCl<sub>3</sub>) δ 158.1, 147.9, 131.2, 130.0, 129.1, 125.0 (q, *J* = 224.2 Hz, 1C), 123.2, 120.7, 84.0 (q, *J* = 2.0 Hz, 1C) 43.8 (q, *J* = 21.21Hz, 1C), 29.6, 26.7, 26.7, 8.0, 7.9.

<sup>19</sup>F NMR (377 MHz, CDCl<sub>3</sub>) δ - 60.9.

HRMS (ESI) *m/z* calcd for C<sub>14</sub>H<sub>14</sub>F<sub>3</sub>NO [M+H]<sup>+</sup>: 270.1100, found: 270.1100.

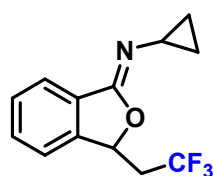

**3ac**

(Z)-N-cyclopropyl-3-(2,2,2-trifluoroethyl)isobenzofuran-1(3H)-imine

**3ac** was obtained according the general procedure and purified by neutral alumina column (petroleum ether/ethyl acetate =15:1 to 10:1). Colorless oil (68% yield).

<sup>1</sup>H NMR (500 MHz, CDCl<sub>3</sub>) δ 7.76 (d, *J* = 7.8 Hz, 1H), 7.50 (td, *J* = 7.5, 1.2 Hz, 1H), 7.44 (t, *J* = 7.5 Hz, 1H), 7.37 - 7.31 (m, 1H), 5.74 (dd, *J* = 8.8, 3.3 Hz, 1H), 3.41 (tt, *J* = 7.2, 3.7 Hz, 1H), 2.71 (dq, *J* = 15.6, 10.6, 3.4 Hz, 1H), 2.57 (dq, *J* = 15.4, 10.2, 8.7 Hz, 1H), 0.86 - 0.80 (m, 2H), 0.76 (tdd, *J* = 8.5, 7.3, 4.5 Hz, 2H).

<sup>13</sup>C NMR (126MHz,CDCl<sub>3</sub>)δ 158.5, 143.6, 131.3, 130.5, 129.3, 125.4 (q, *J* = 223.2 Hz, 1C), 123.3, 121.2, 76.4 (q, *J* = 3.0 Hz,1C), 40.6 (q, *J* = 8.1Hz, 1C), 29.6, 8.1, 7.9.

<sup>19</sup>F NMR (377 MHz, CDCl<sub>3</sub>) δ - 63.7.

HRMS (ESI) *m/z* calcd for C<sub>13</sub>H<sub>12</sub>F<sub>3</sub>NO [M+H]<sup>+</sup>: 256.0944, found: 256.0943.

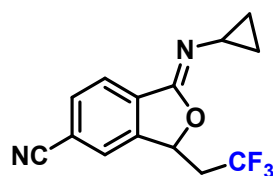

**3ad**

(Z)-1-(cyclopropylimino)-3-(2,2,2-trifluoroethyl)-1,3-dihydroisobenzofuran-5-carbonitrile

**3ad** was obtained according the general procedure and purified by neutral alumina column (petroleum ether/ethyl acetate =15:1 to 10:1). White solid (74% yield), mp 113-116°C.

**<sup>1</sup>H NMR** (400 MHz, CDCl<sub>3</sub>) δ 7.85 (d, *J* = 8.0 Hz, 1H), 7.73 (d, *J* = 8.0 Hz, 1H), 7.66 (s, 1H), 5.78 (dd, *J* = 8.1, 4.0 Hz, 1H), 3.39 (tt, *J* = 7.1, 3.5 Hz, 1H), 2.79 - 2.57 (m, 2H), 0.87 (td, *J* = 6.6, 2.1 Hz, 2H), 0.82 - 0.73 (m, 2H).

**<sup>13</sup>C NMR** (101 MHz, CDCl<sub>3</sub>) δ 156.3, 144.0, 134.8, 133.3, 125.6, 125.0 (q, *J* = 279.8 Hz, 1C), 124.2, 117.9, 114.8, 76.2, 40.1 (q, *J* = 29.3 Hz, 1C), 30.1, 8.6, 8.5.

**<sup>19</sup>F NMR** (377 MHz, CDCl<sub>3</sub>) δ - 63.5.

**HRMS** (ESI) *m/z* calcd for C<sub>14</sub>H<sub>11</sub>F<sub>3</sub>N<sub>2</sub>O [M+H]<sup>+</sup>: 281.0896, found: 281.0898.

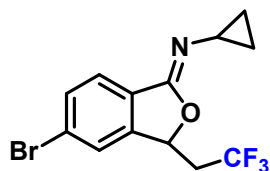

**3ae**

(*Z*)-5-bromo-*N*-cyclopropyl-3-(2,2,2-trifluoroethyl)isobenzofuran-1(3H)-imine

**3ae** was obtained according the general procedure and purified by neutral alumina column (petroleum ether/ethyl acetate =15:1 to 10:1). White solid (78% yield), mp 119-123 °C.

**<sup>1</sup>H NMR** (400 MHz, CDCl<sub>3</sub>) δ 7.62 (d, *J* = 8.2 Hz, 1H), 7.57 (dd, *J* = 8.2, 1.6 Hz, 1H), 7.50 (s, 1H), 5.71 (dd, *J* = 8.5, 3.5 Hz, 1H), 3.37 (tt, *J* = 7.3, 3.6 Hz, 1H), 2.76 - 2.51 (m, 2H), 0.91 - 0.80 (m, 2H), 0.80 - 0.67 (m, 2H).

**<sup>13</sup>C NMR** (101 MHz, CDCl<sub>3</sub>) δ 157.3, 145.4, 132.8, 129.6, 125.6, 125.2 (q, *J* = 278.8 Hz, 1C), 124.7, 124.6, 75.8, 40.3 (q, *J* = 28.3 Hz, 1C), 29.7, 8.2, 8.0.

**<sup>19</sup>F NMR** (377 MHz, CDCl<sub>3</sub>) δ - 63.7.

**HRMS** (ESI) *m/z* calcd for C<sub>13</sub>H<sub>11</sub>BrF<sub>3</sub>NO [M+H]<sup>+</sup>: 334.0049, found: 334.0048.

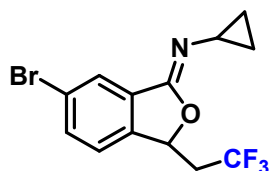

**3af**

(*Z*)-6-bromo-*N*-cyclopropyl-3-(2,2,2-trifluoroethyl)isobenzofuran-1(3H)-imine

**3af** was obtained according the general procedure and purified by neutral alumina column (petroleum ether/ethyl acetate =15:1 to 10:1). White solid (77% yield), mp 123-126 °C.

**<sup>1</sup>H NMR** (500 MHz, CDCl<sub>3</sub>) δ 7.91 (d, *J* = 1.8 Hz, 1H), 7.61 (dd, *J* = 8.1, 1.8 Hz, 1H), 7.22 (d, *J* = 8.1 Hz, 1H), 5.69 (dd, *J* = 8.4, 3.7 Hz, 1H), 3.37 (tt, *J* = 7.2, 3.6 Hz, 1H), 2.75 - 2.52 (m, 2H), 0.87 - 0.80 (m, 2H), 0.75 (dtd, *J* = 7.9, 4.8, 3.7, 1.4 Hz, 2H).

**<sup>13</sup>C NMR** (101 MHz, CDCl<sub>3</sub>) δ 156.8, 142.2, 134.3, 132.7, 126.3, 125.3 (q, *J* = 223.21 Hz, 1C), 123.6, 122.8, 76.3 (q, *J* = 2.02 Hz, 1C), 40.19 (q, *J* = 23.23 Hz, 1C), 29.73, 8.28, 8.12.

**<sup>19</sup>F NMR** (377 MHz, CDCl<sub>3</sub>) δ - 63.6.

**HRMS** (ESI) *m/z* calcd for C<sub>13</sub>H<sub>11</sub>BrF<sub>3</sub>NO [M+H]<sup>+</sup>: 334.0049, found: 334.0048.

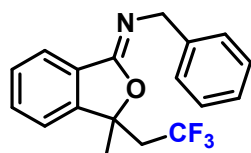

**3ag**

*(E)*-N-benzyl-3-methyl-3-(2,2,2-trifluoroethyl)isobenzofuran-1(3H)-imine

**3ag** was obtained according the general procedure and purified by neutral alumina column (petroleum ether/ethyl acetate =15:1 to 10:1). Colorless oil (75% yield).

<sup>1</sup>H NMR (400 MHz, CDCl<sub>3</sub>) δ 7.82 (d, *J* = 7.5 Hz, 1H), 7.48 - 7.27 (m, 5H), 7.25 - 7.13 (m, 3H), 4.66 (s, 2H), 2.77 - 2.68 (m, 1H), 2.65 - 2.54 (m, 1H), 1.64 (s, 3H).

<sup>13</sup>C NMR (101 MHz, CDCl<sub>3</sub>) δ 157.1, 147.3, 139.5, 130.7, 128.8, 128.2, 127.3, 126.9, 125.5, 123.9 (q, *J* = 278.76 Hz, 1C), 122.8, 119.7, 83.4, 83.4, 50.1, 42.6 (q, *J* = 27.3 Hz, 1C), 25.8.

<sup>19</sup>F NMR (376 MHz, CDCl<sub>3</sub>) δ - 60.9.

HRMS (ESI) *m/z* calcd for C<sub>18</sub>H<sub>16</sub>F<sub>3</sub>NO [M+H]<sup>+</sup>: 320.1257, found: 320.1256.

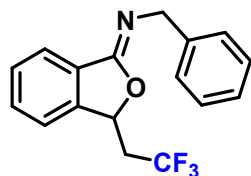

**3ah**

*(E)*-N-benzyl-3-(2,2,2-trifluoroethyl)isobenzofuran-1(3H)-imine

**3ah** was obtained according the general procedure and purified by neutral alumina column (petroleum ether/ethyl acetate =15:1 to 10:1). Colorless oil (66% yield).

<sup>1</sup>H NMR (400 MHz, CDCl<sub>3</sub>) δ 7.84 (d, *J* = 7.6 Hz, 1H), 7.47 (td, *J* = 7.4, 1.3 Hz, 1H), 7.42 (d, *J* = 7.4 Hz, 1H), 7.37 (d, *J* = 7.5 Hz, 2H), 7.30 - 7.23 (m, 3H), 7.18 - 7.13 (m, 1H), 5.68 (dd, *J* = 8.8, 3.3 Hz, 1H), 4.67 (s, 2H), 2.73 - 2.59 (m, 1H), 2.54 - 2.41 (m, 1H).

<sup>13</sup>C NMR (101 MHz, CDCl<sub>3</sub>) δ 157.6, 143.1, 139.4, 130.7, 129.3, 128.5, 127.3, 127.0, 125.6, 124.3 (q, *J* = 278.76 Hz, 1C), 122.9, 120.2, 50.2, 39.2 (q, *J* = 29.3 Hz), 28.7.

<sup>19</sup>F NMR (376 MHz, CDCl<sub>3</sub>) δ - 63.6.

HRMS (ESI) *m/z* calcd for C<sub>17</sub>H<sub>14</sub>F<sub>3</sub>NO [M+H]<sup>+</sup>: 306.1100, found: 306.1099.

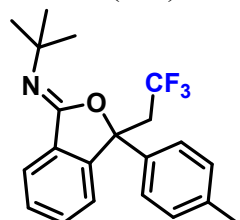

**3ai**

*(E)*-N-(tert-butyl)-3-(p-tolyl)-3-(2,2,2-trifluoroethyl)isobenzofuran-1(3H)-imine

**3ai** was obtained according the general procedure and purified by neutral alumina column (petroleum ether/ethyl acetate =15:1 to 10:1). Colorless oil (76% yield).

**<sup>1</sup>H NMR** (400 MHz, CDCl<sub>3</sub>) δ 7.73 (d, *J* = 7.6 Hz, 1H), 7.40 - 7.35 (m, 1H), 7.33 - 7.26 (m, 4H), 7.09 (d, *J* = 8.1 Hz, 2H), 3.19 (dq, *J* = 15.6, 10.0 Hz, 1H), 2.97 (dq, *J* = 15.6, 9.9 Hz, 1H), 2.23 (s, 3H), 1.40 (s, 9H).

**<sup>13</sup>C NMR** (101 MHz, CDCl<sub>3</sub>) δ 152.9, 145.3, 137.2, 137.1, 130.2, 130.0, 128.4, 128.0, 123.6 (q, *J* = 279.8 Hz, 1C), 123.4, 123.1, 120.7, 85.8, 52.8, 42.3 (q, *J* = 28.3 Hz, 1C), 29.1, 19.9.

**<sup>19</sup>F NMR** (376 MHz, CDCl<sub>3</sub>) δ - 60.1.

**HRMS** (ESI) *m/z* calcd for C<sub>21</sub>H<sub>22</sub>F<sub>3</sub>NO [M+H]<sup>+</sup>: 362.1726, found: 362.1726.

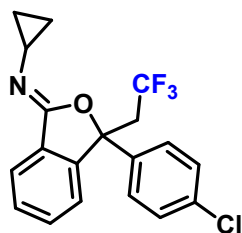

**3aj**

(*Z*)-3-(4-chlorophenyl)-*N*-cyclopropyl-3-(2,2,2-trifluoroethyl)isobenzofuran-1(3*H*)-imine

**3aj** was obtained according the general procedure and purified by neutral alumina column (petroleum ether/ethyl acetate =15:1 to 10:1). White solid (81% yield), mp 145-149 °C.

**<sup>1</sup>H NMR** (400 MHz, CDCl<sub>3</sub>) δ 7.74 (dd, *J* = 8.0, 1.4 Hz, 1H), 7.48 - 7.32 (m, 7H), 3.50 (tt, *J* = 7.0, 3.7 Hz, 1H), 3.24 (dq, *J* = 15.6, 9.9 Hz, 1H), 3.02 (dq, *J* = 15.5, 9.8 Hz, 1H), 0.90 - 0.84 (m, 2H), 0.84 - 0.77 (m, 2H).

**<sup>13</sup>C NMR** (101 MHz, CDCl<sub>3</sub>) δ 157.6, 146.4, 139.5, 134.5, 131.5, 129.5, 129.1, 126.1, 124.6 (q, *J* = 279.78 Hz, 1C), 123.5, 121.9, 85.8, 43.6 (q, *J* = 27.3 Hz, 1C), 29.9, 8.1, 8.1.

**<sup>19</sup>F NMR** (376 MHz, CDCl<sub>3</sub>) δ - 60.1.

**HRMS** (ESI) *m/z* calcd for C<sub>19</sub>H<sub>15</sub>ClF<sub>3</sub>NO [M+H]<sup>+</sup>: 366.0867, found: 366.0865.

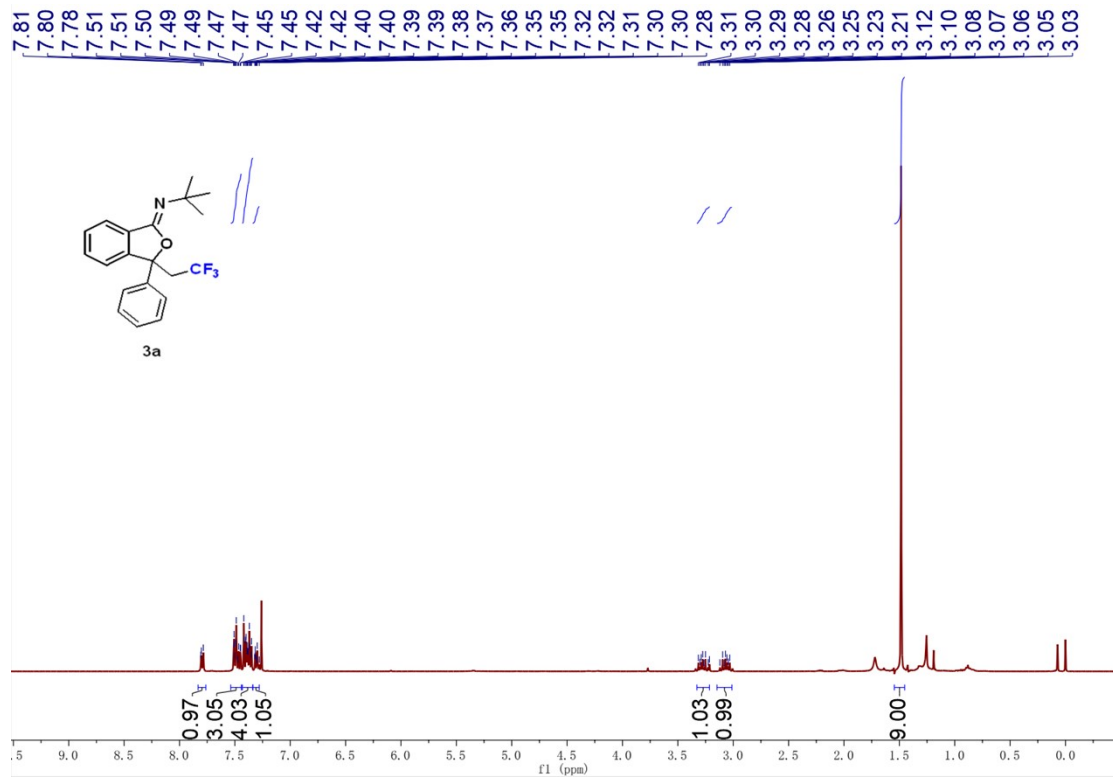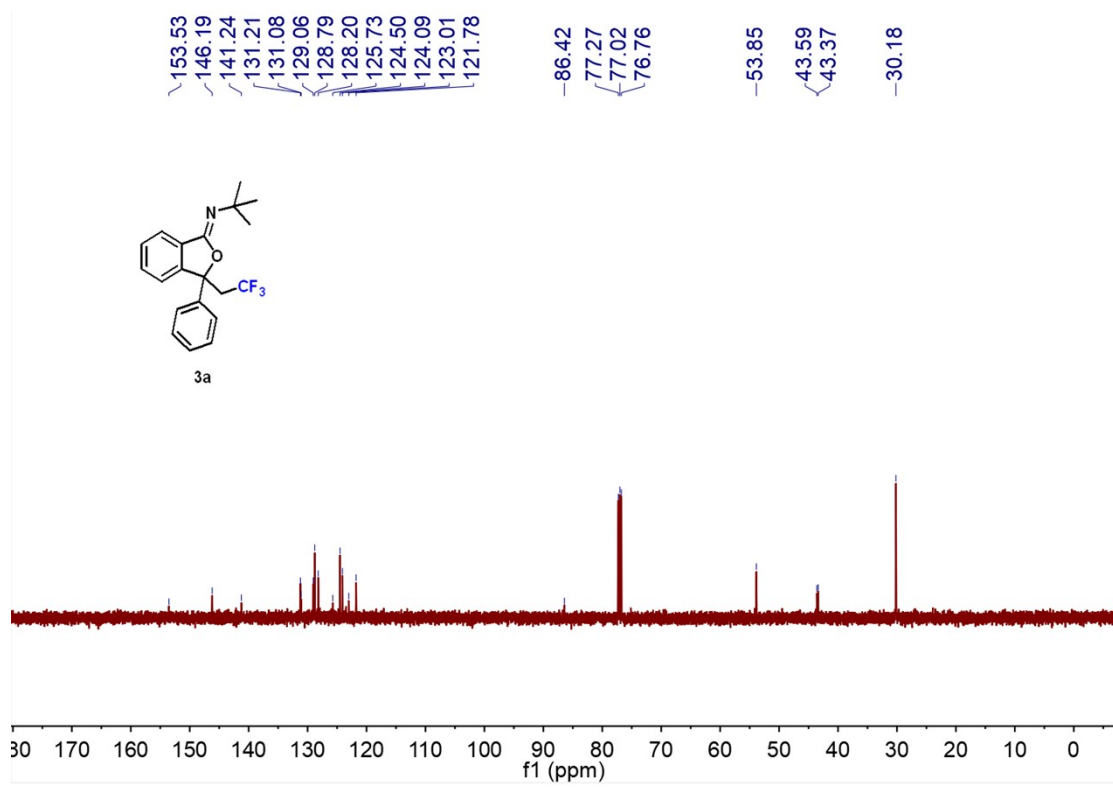

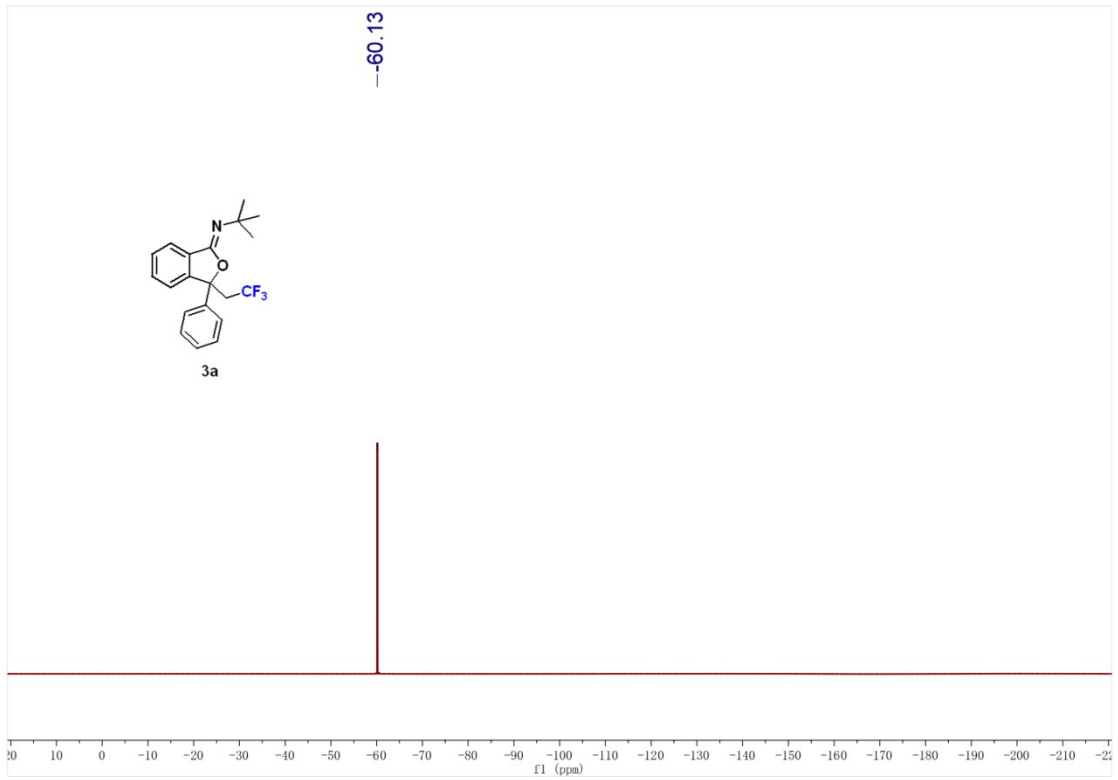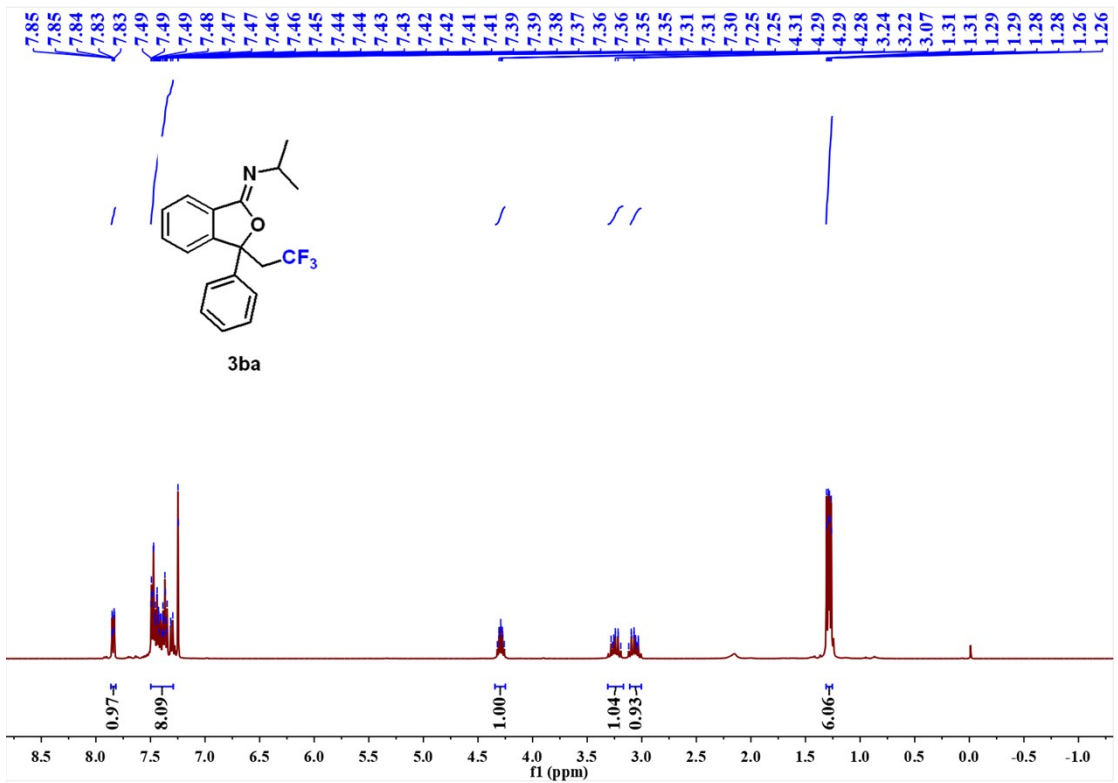



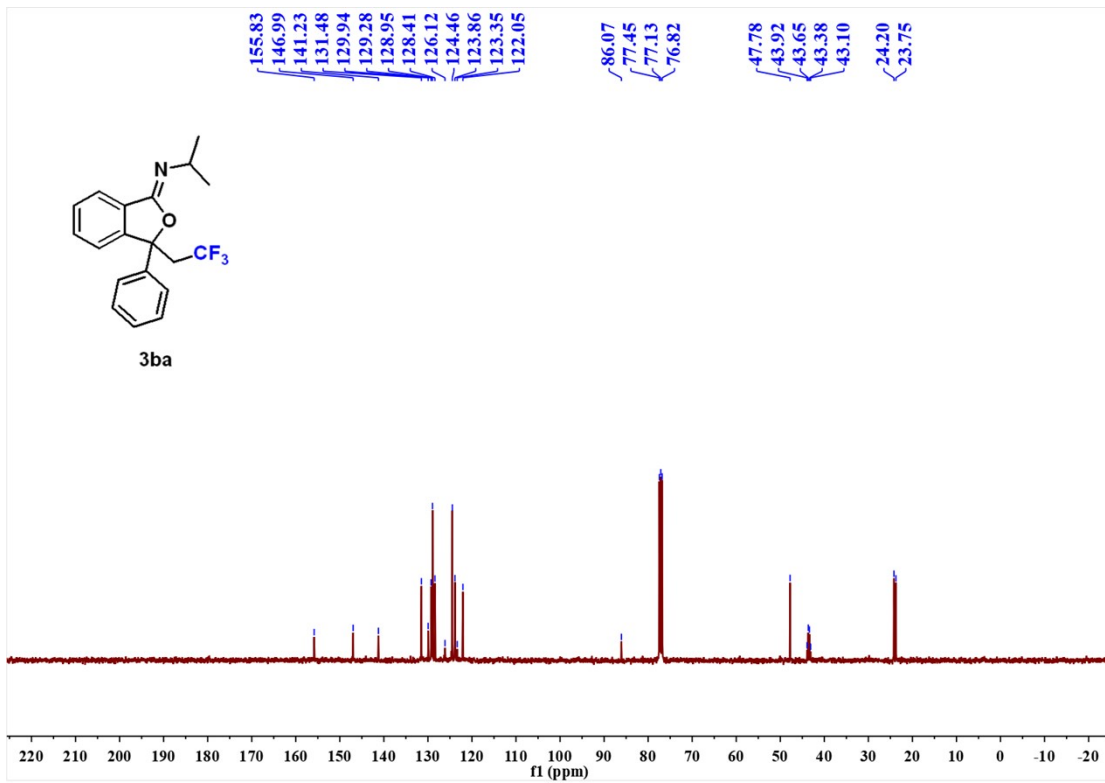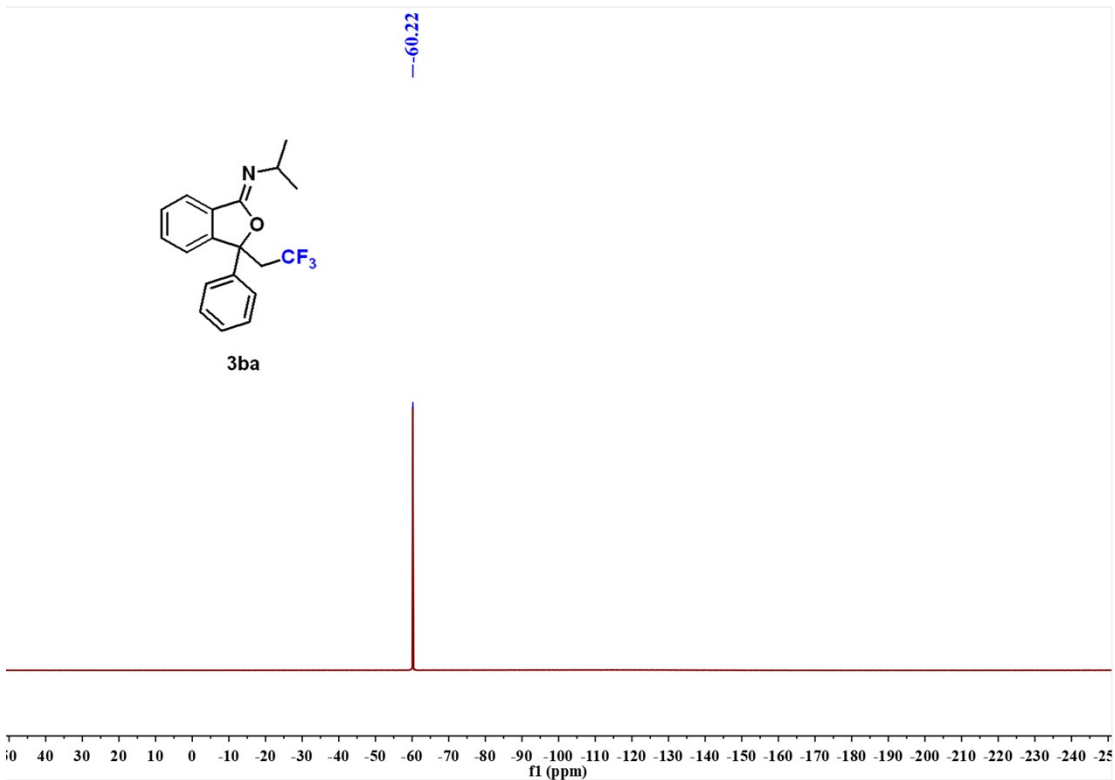

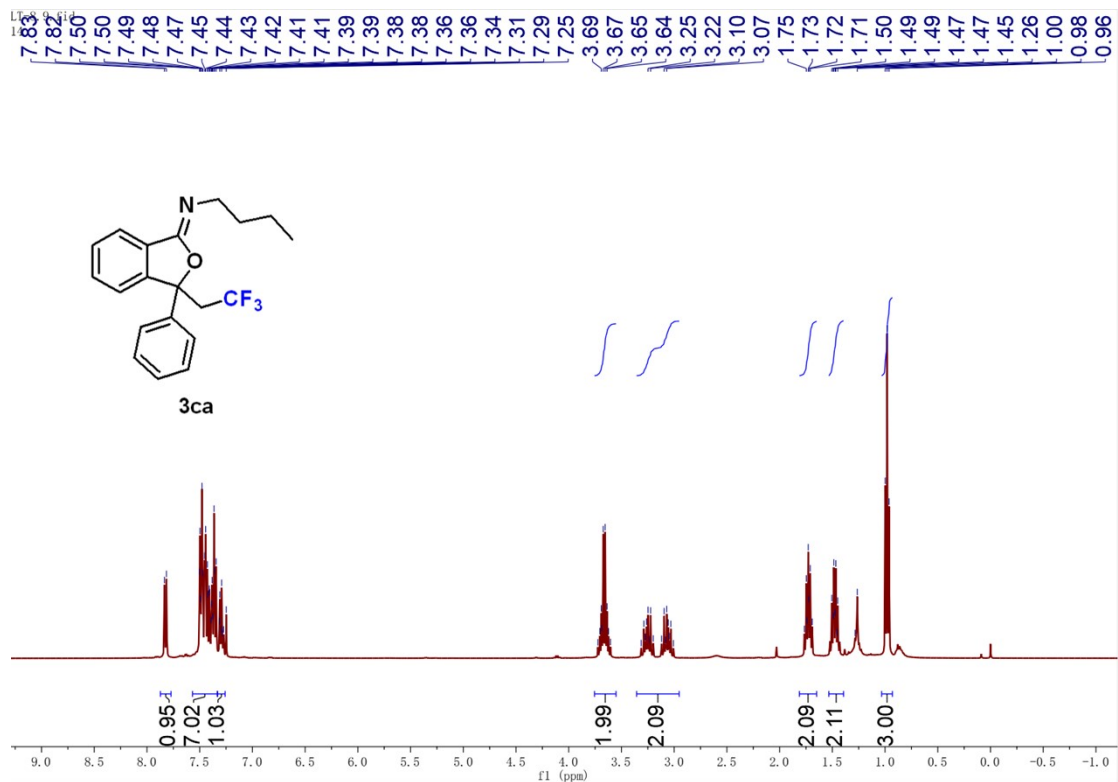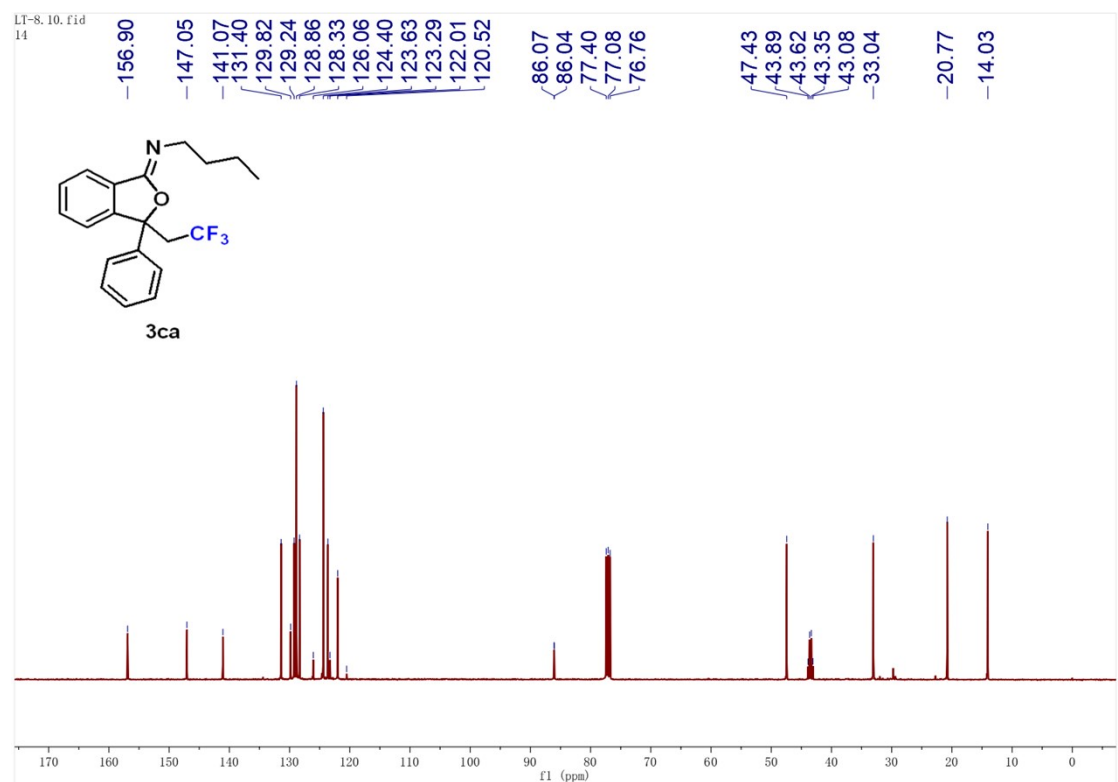

9.10.fid  
14

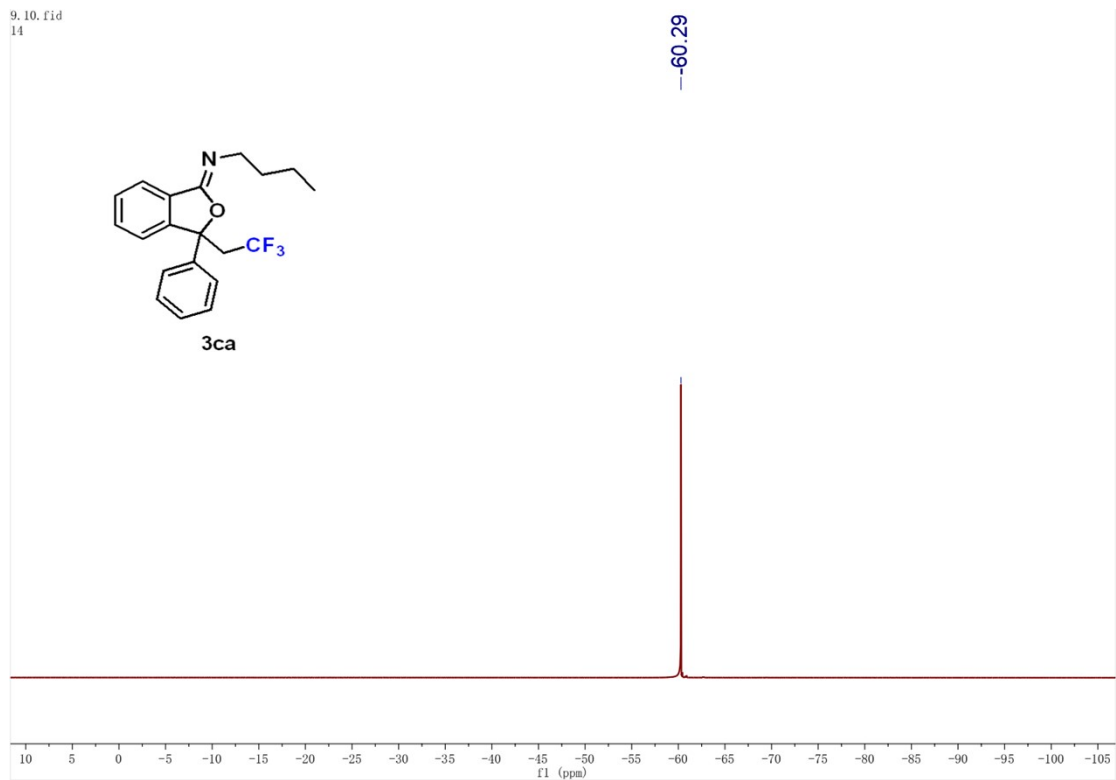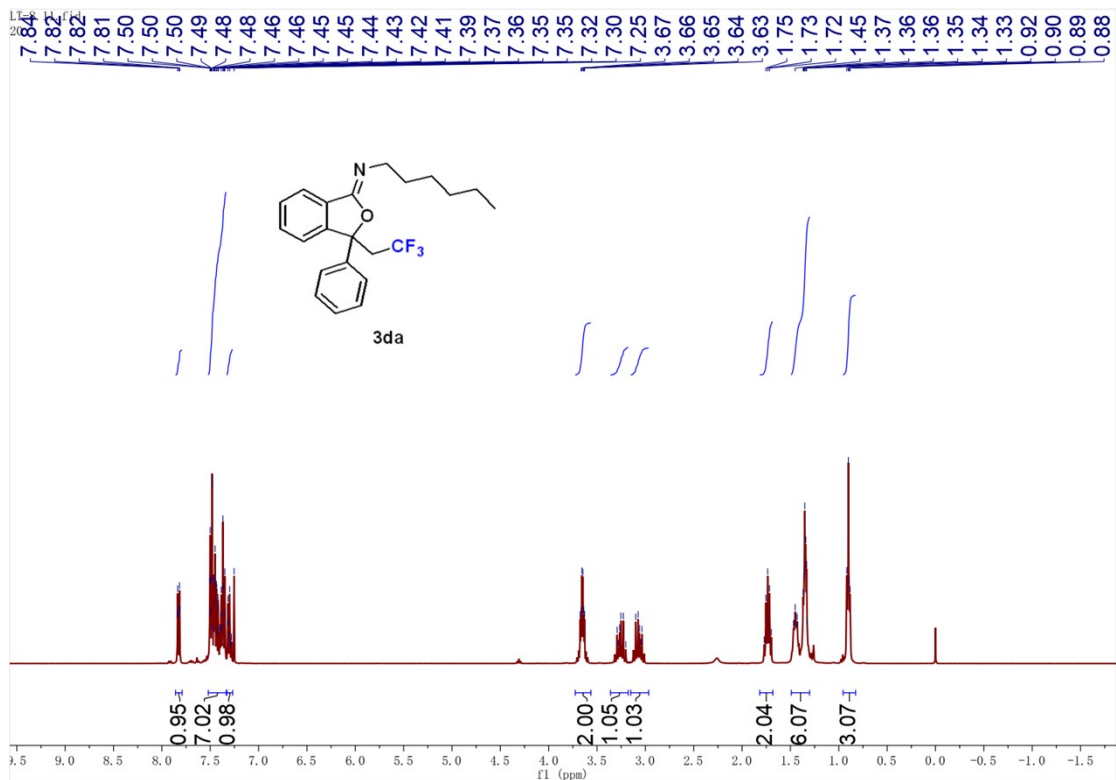

LT-8\_12.fid  
20

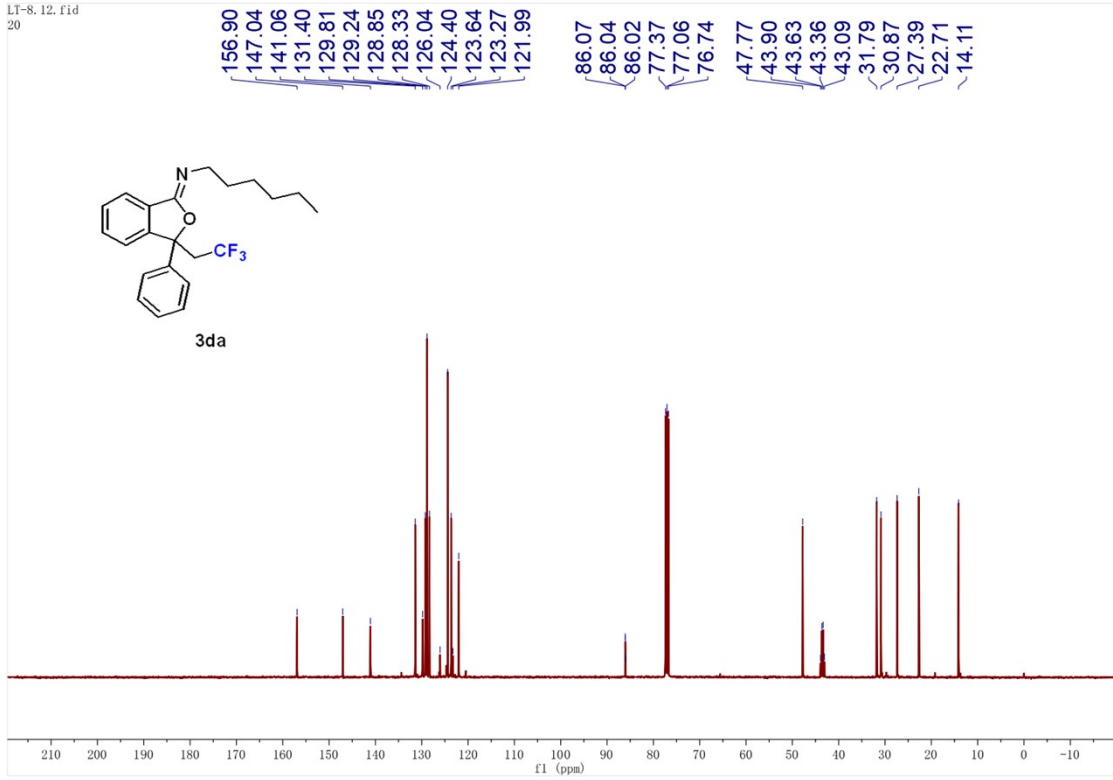

9\_12.fid  
20

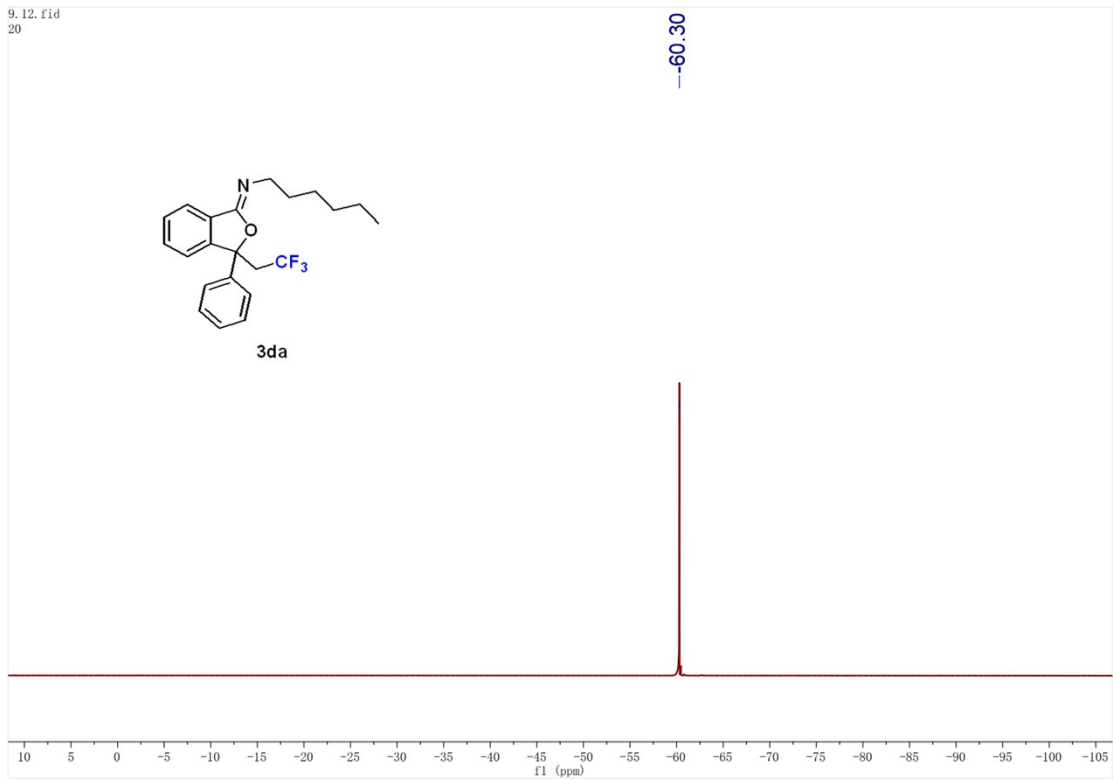

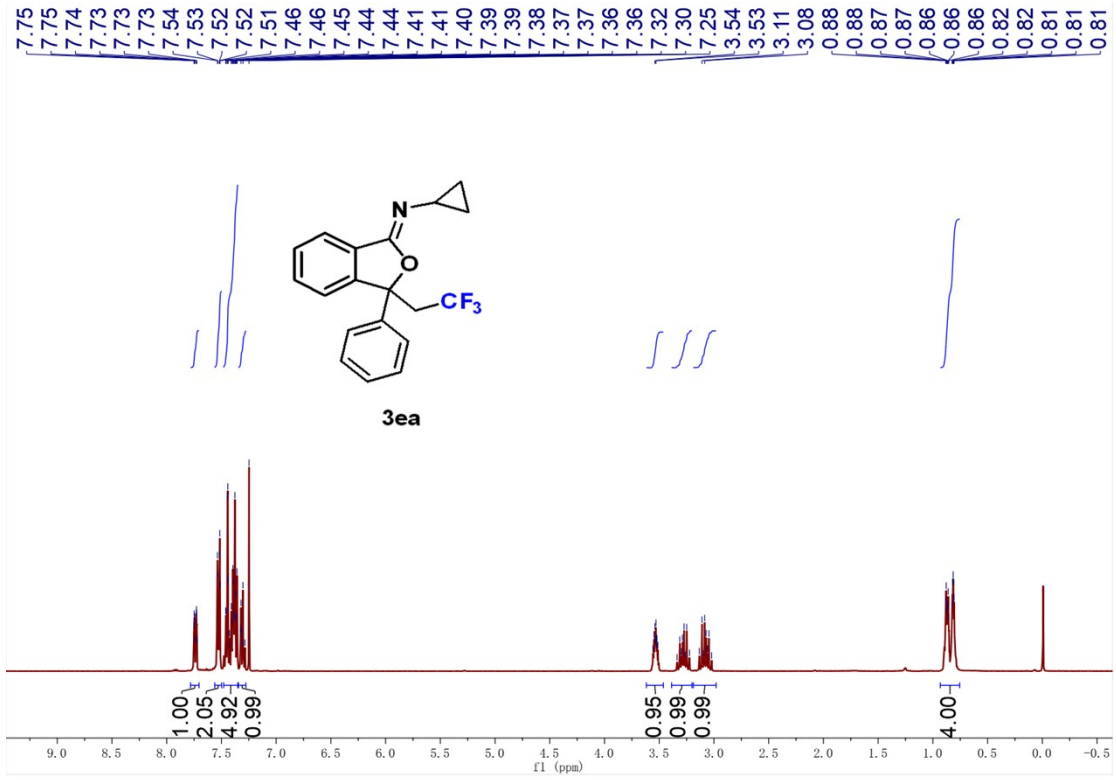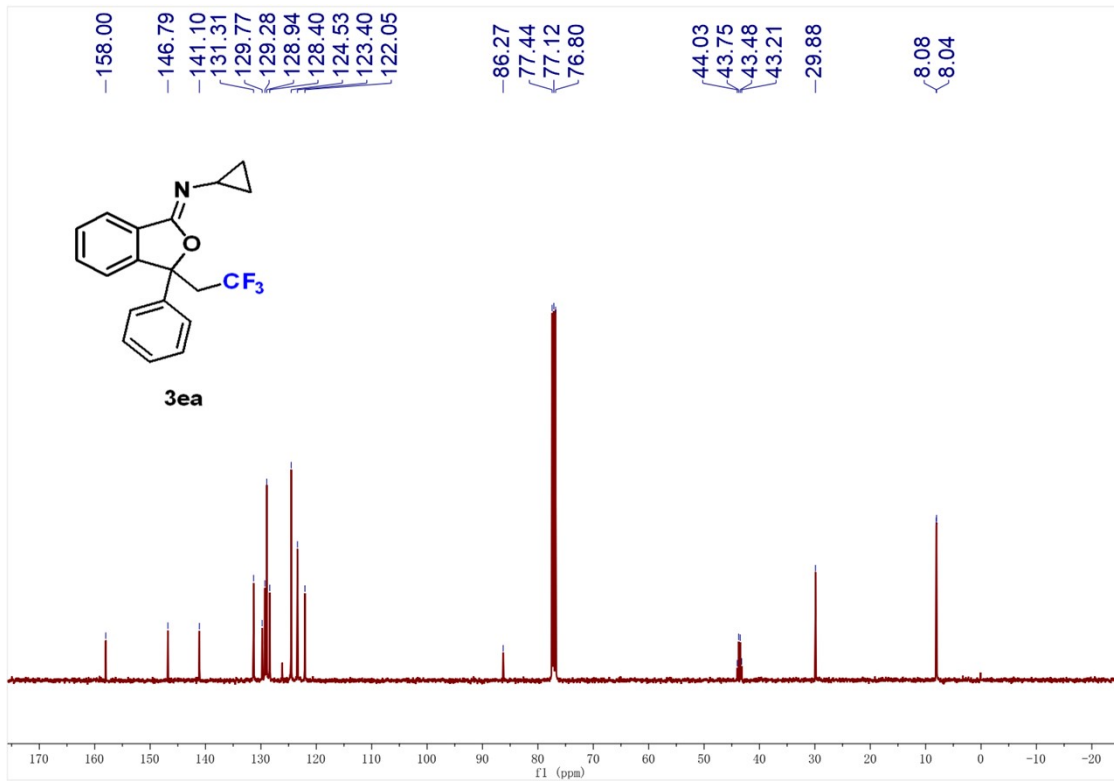

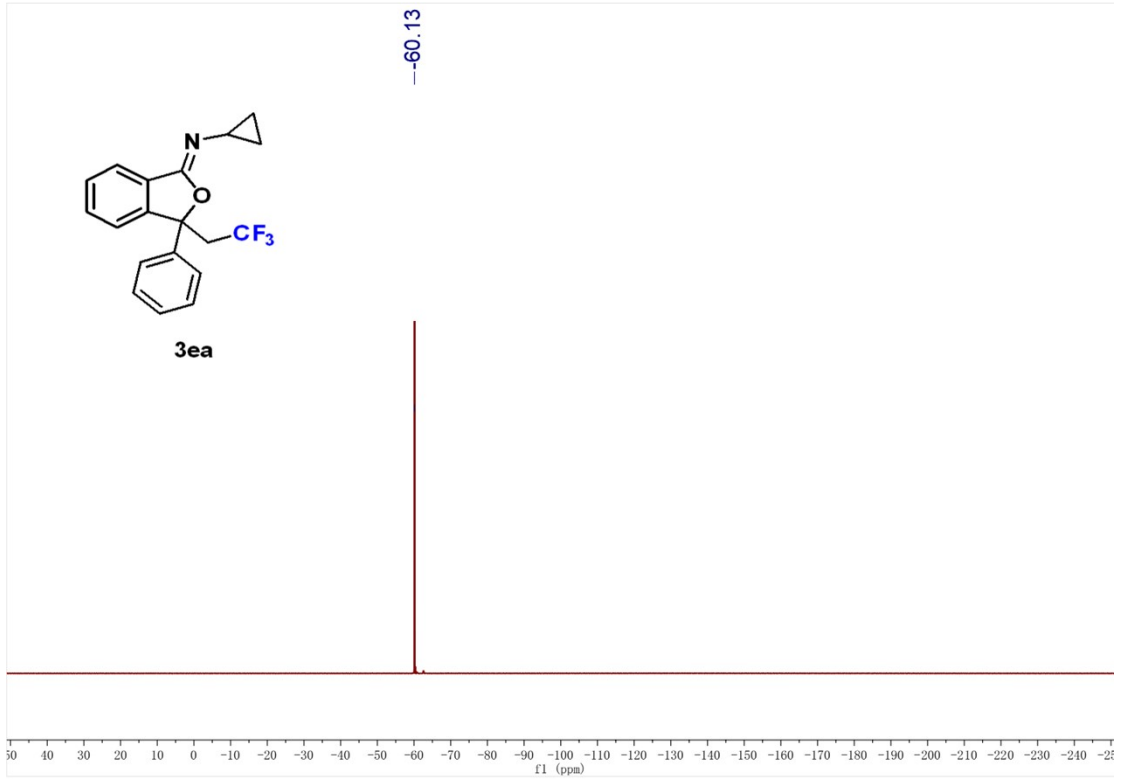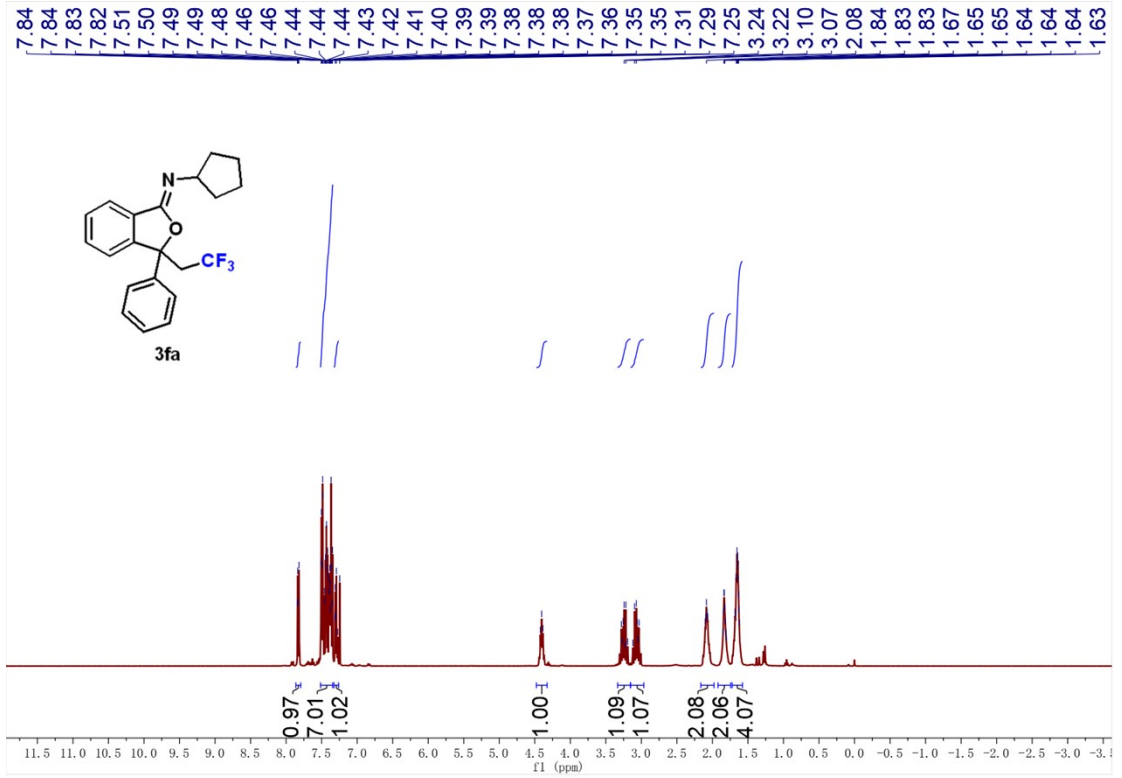

LT-8.8.fid  
11

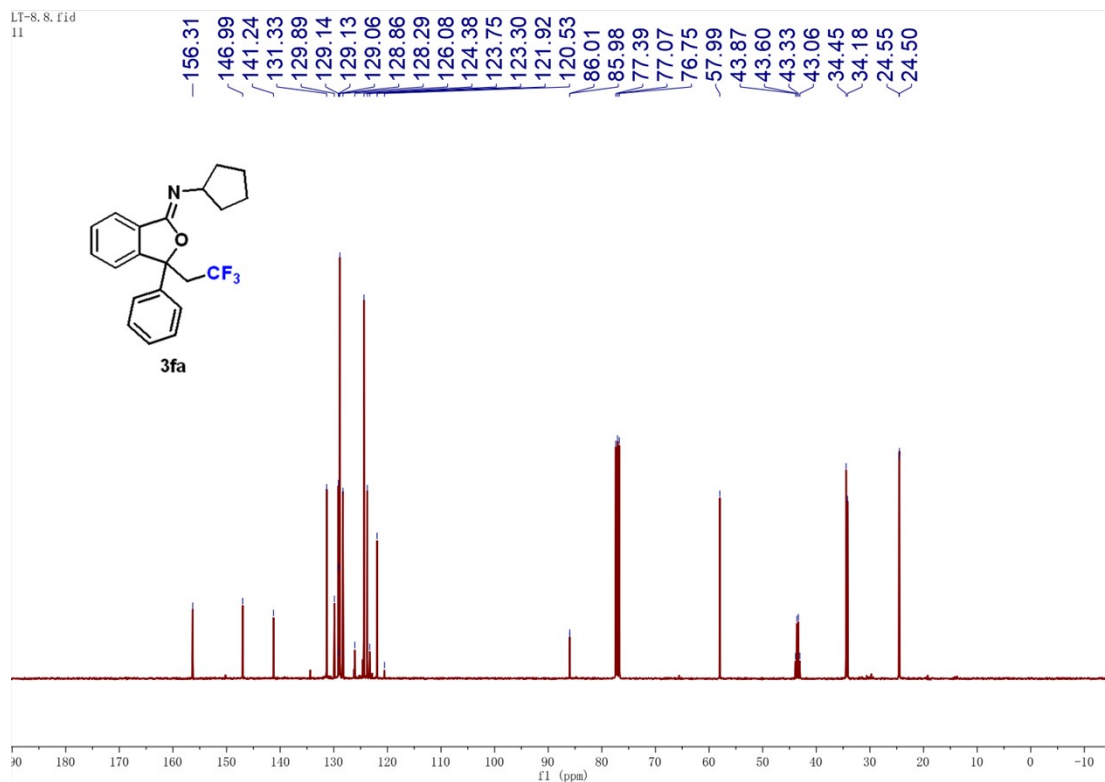

9.9.fid  
11

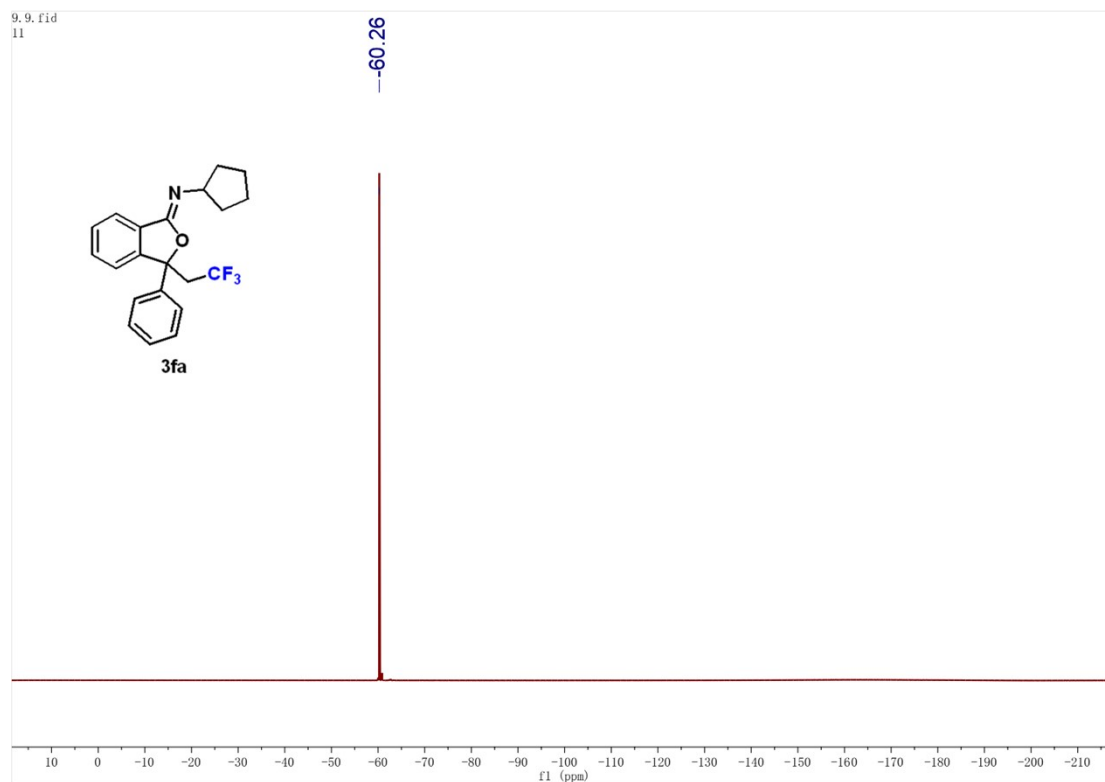

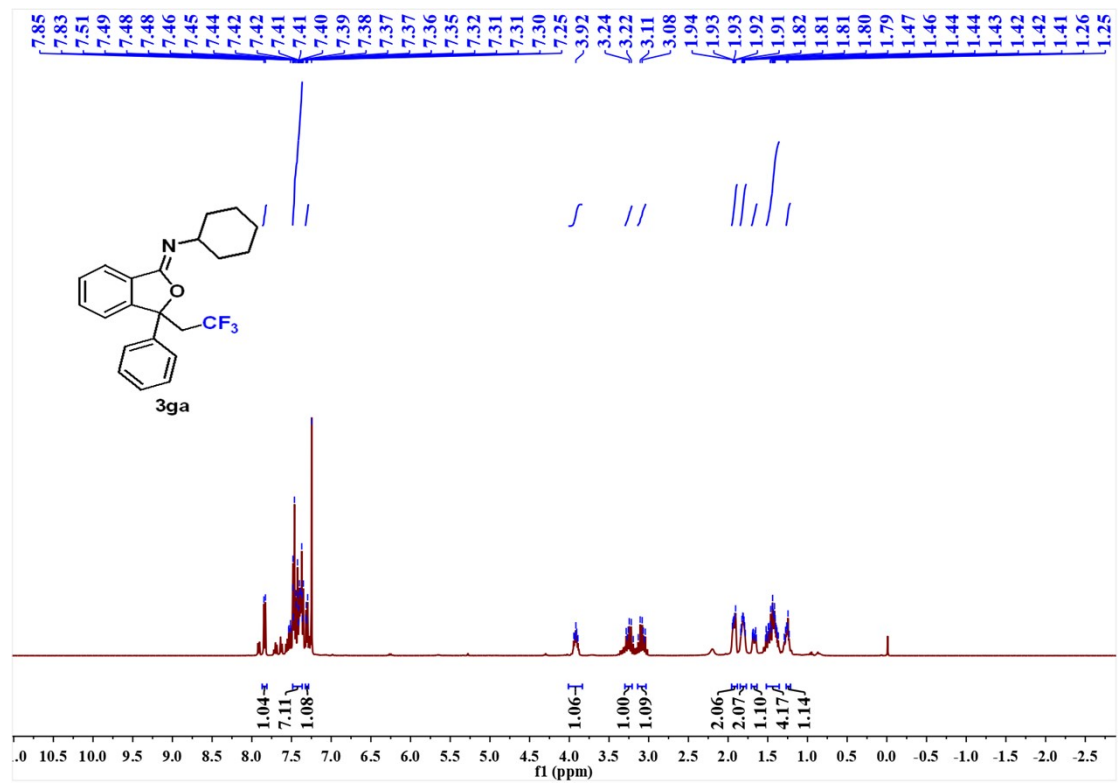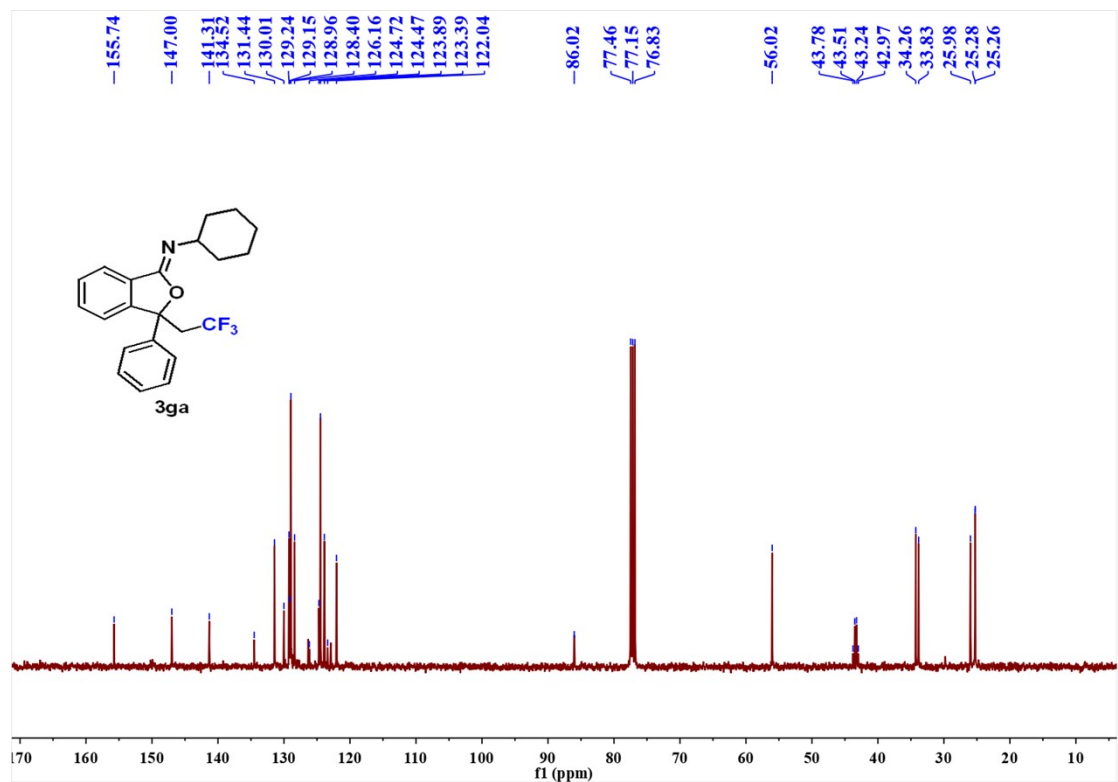



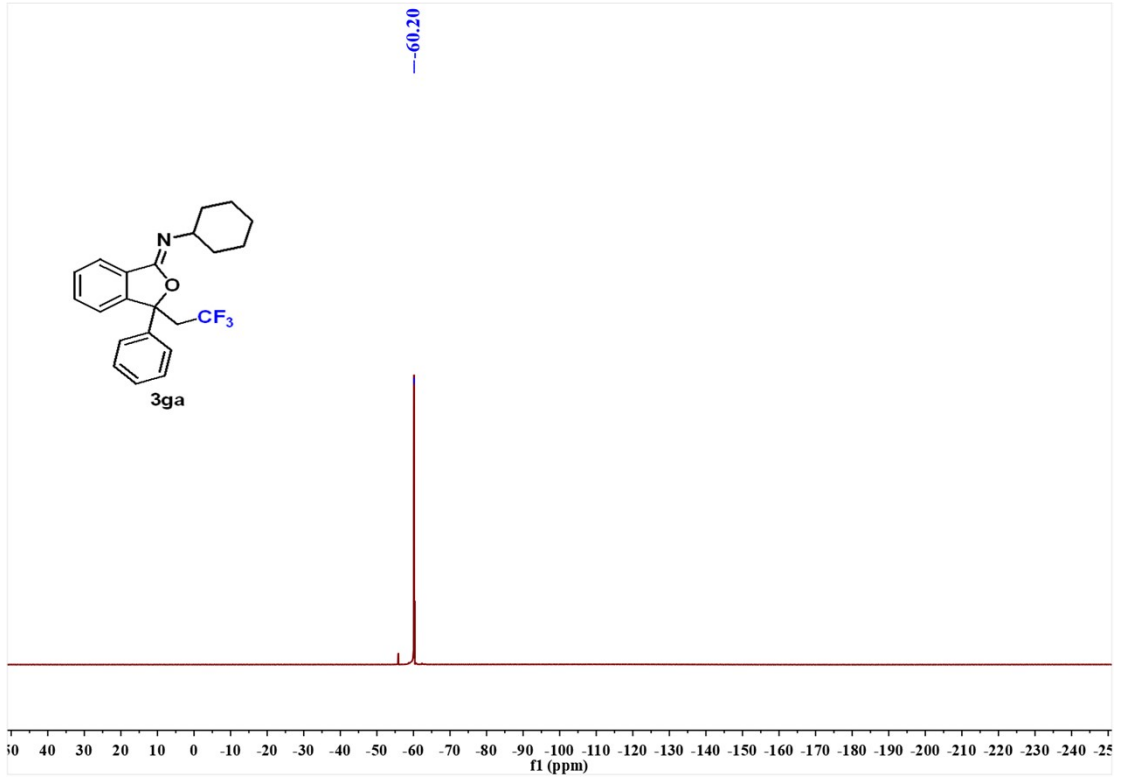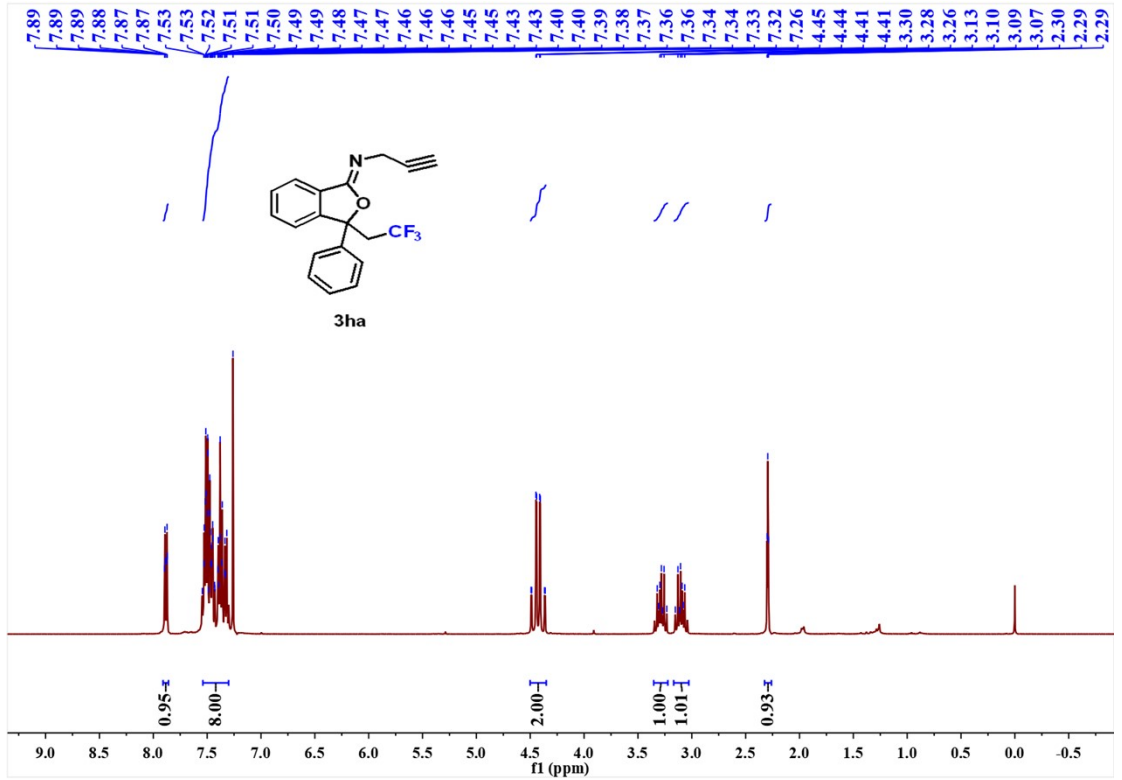

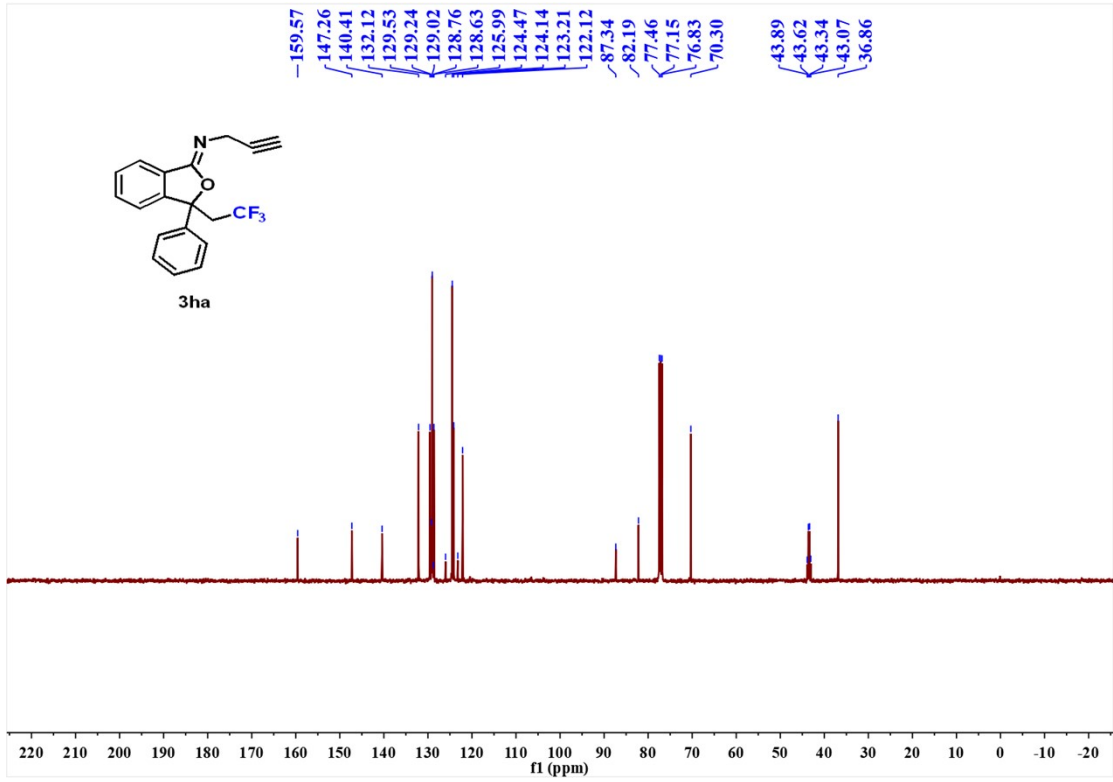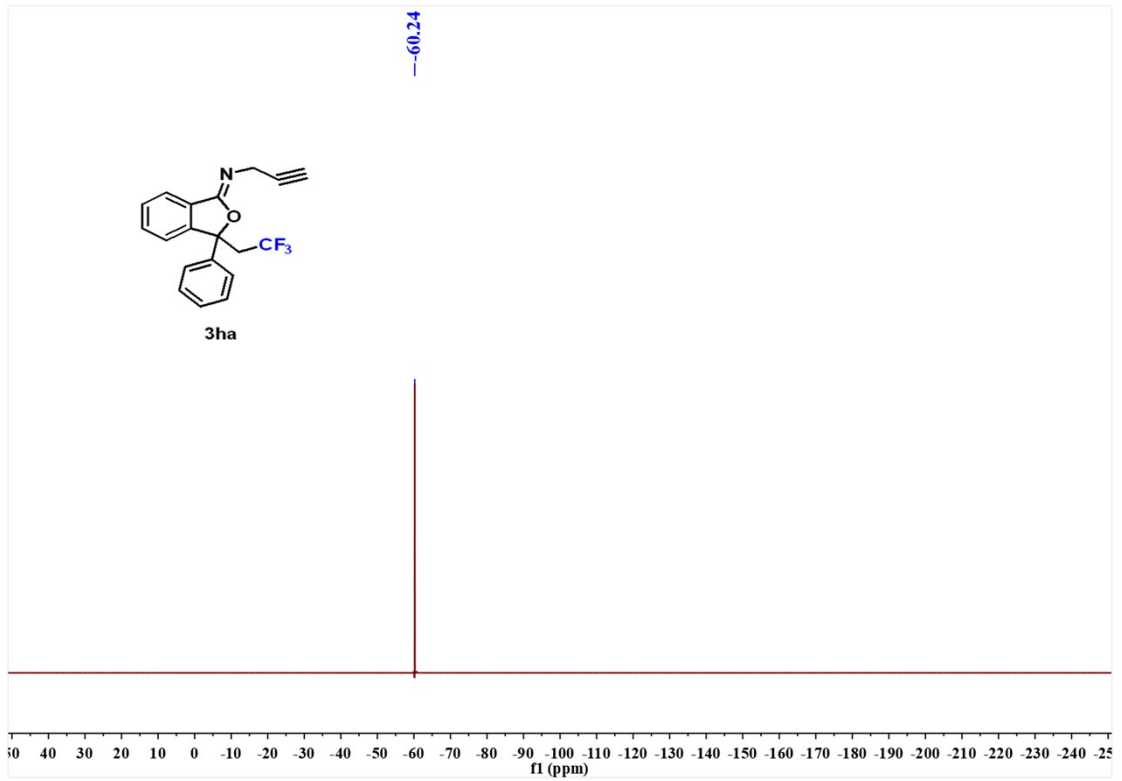

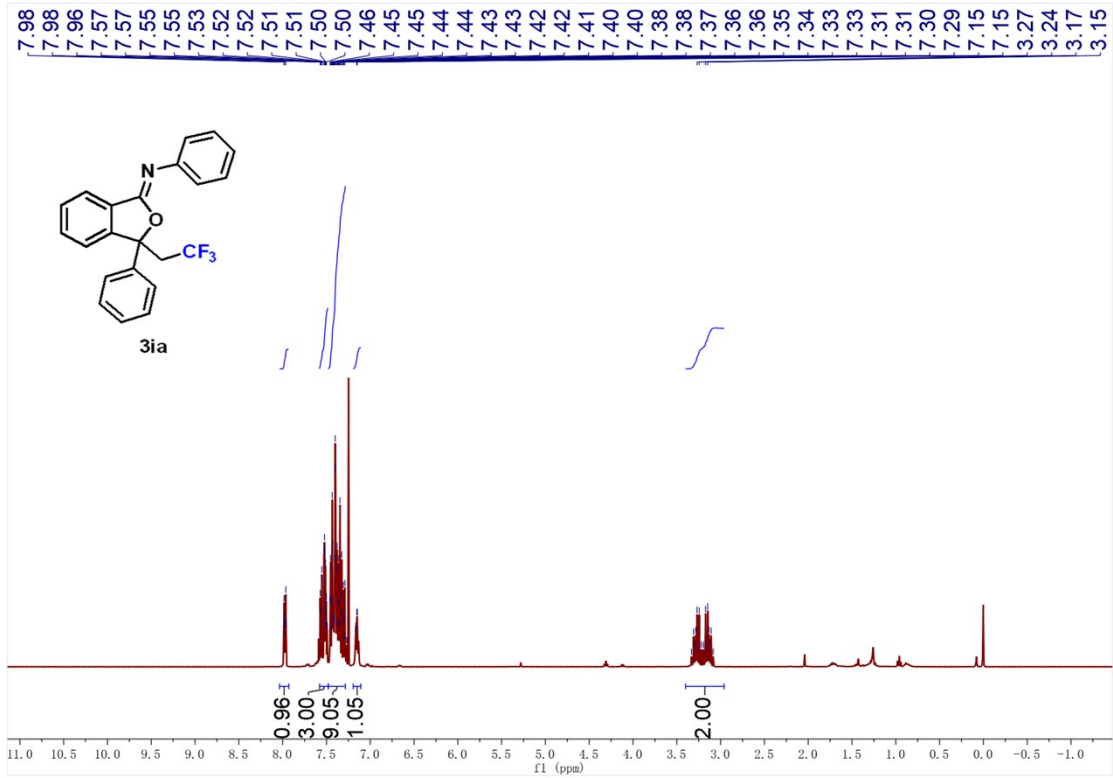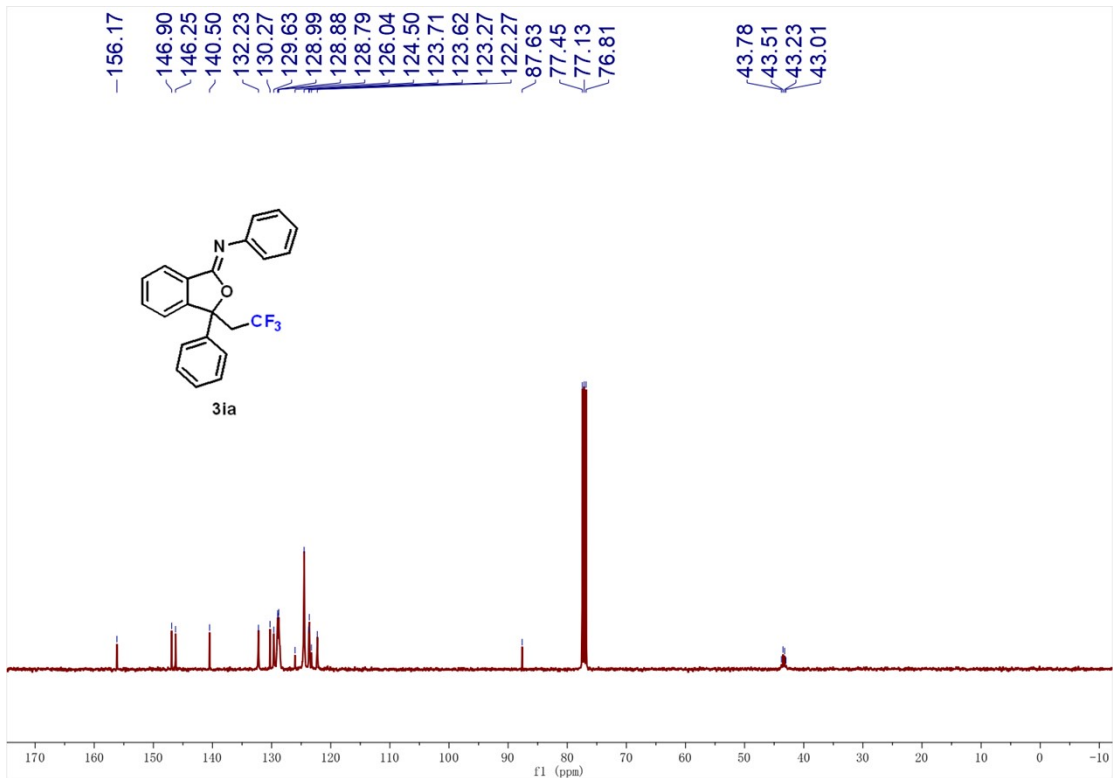

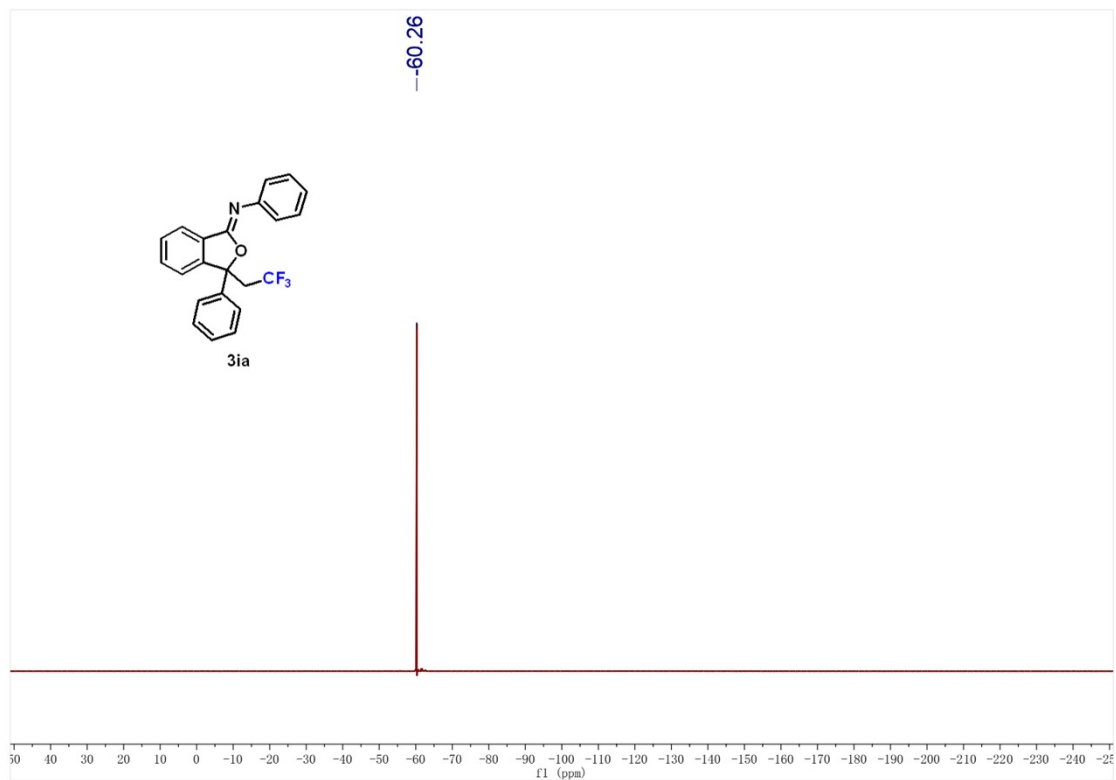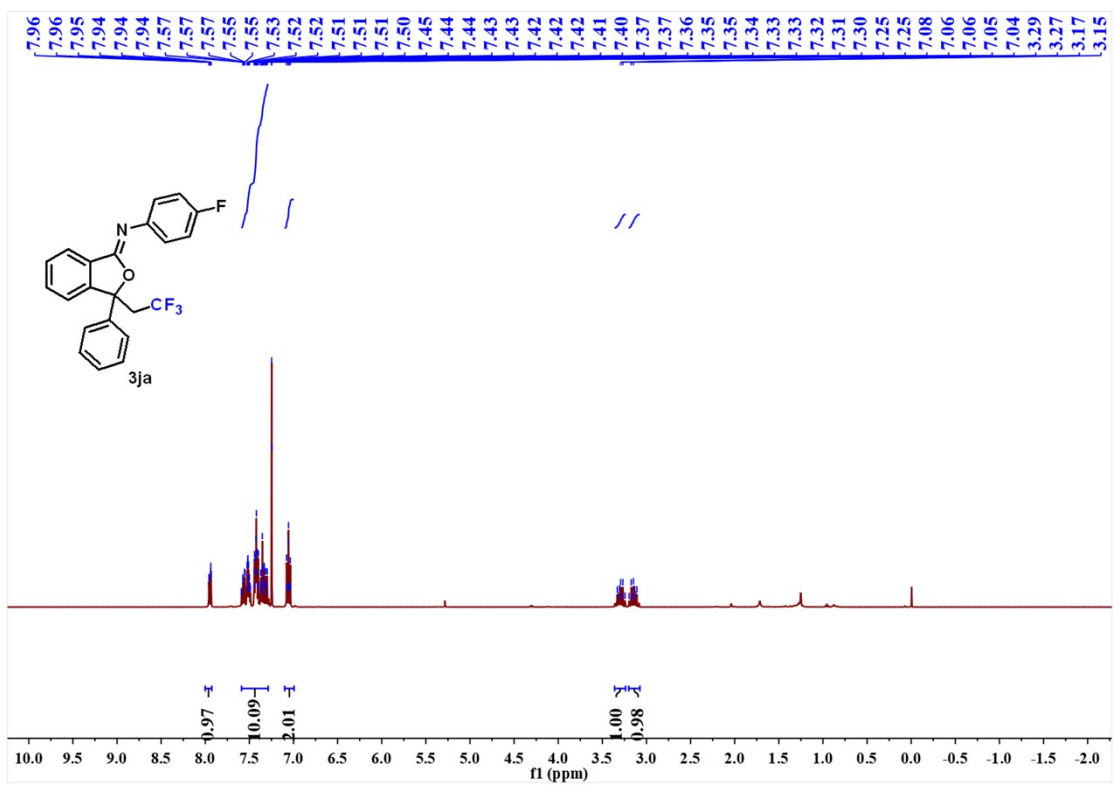

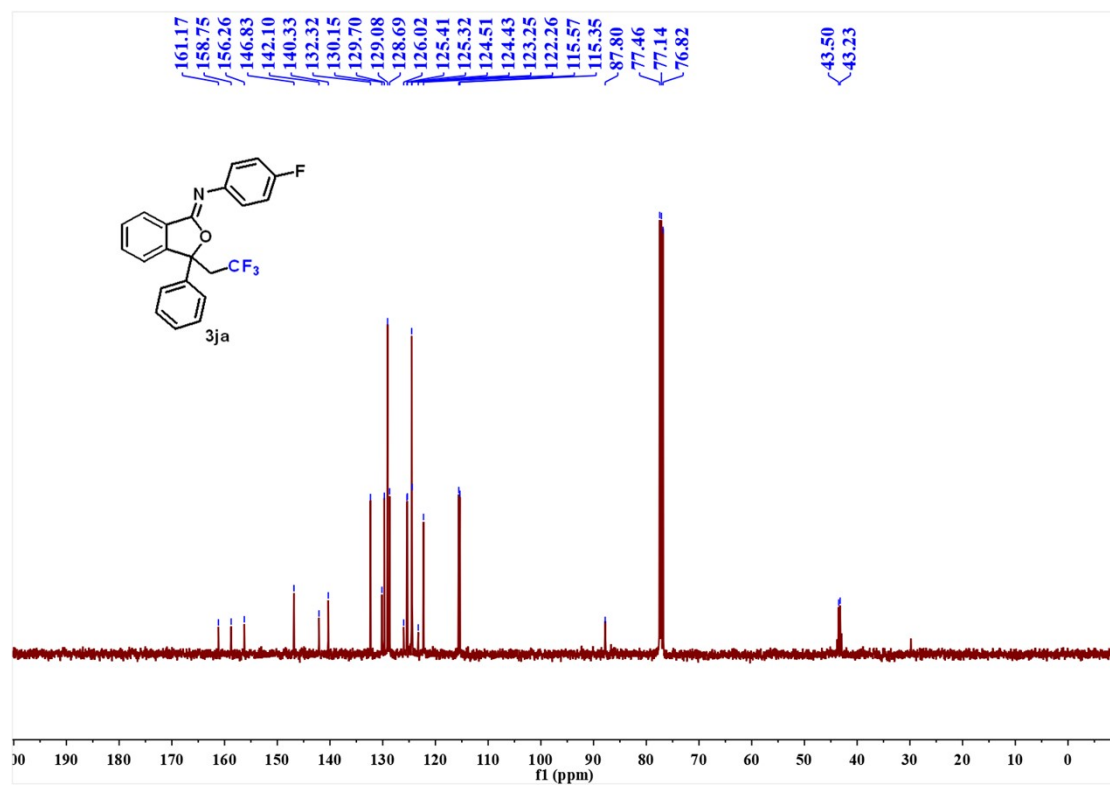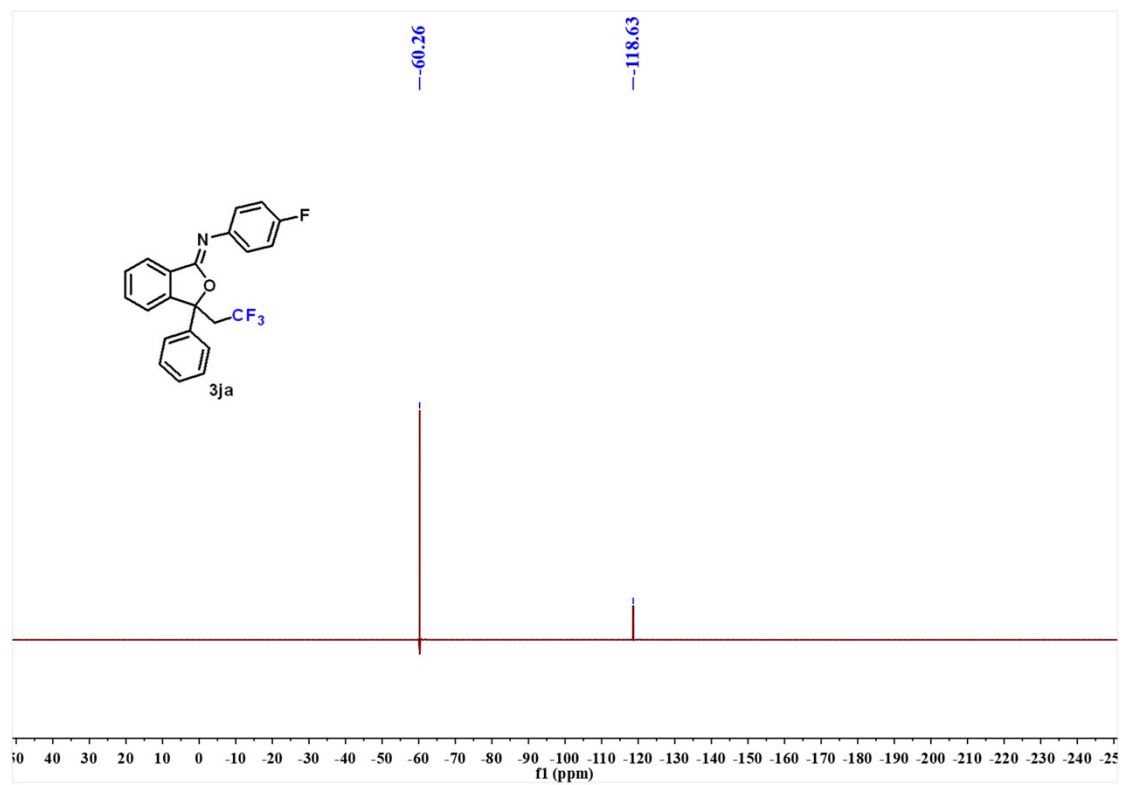

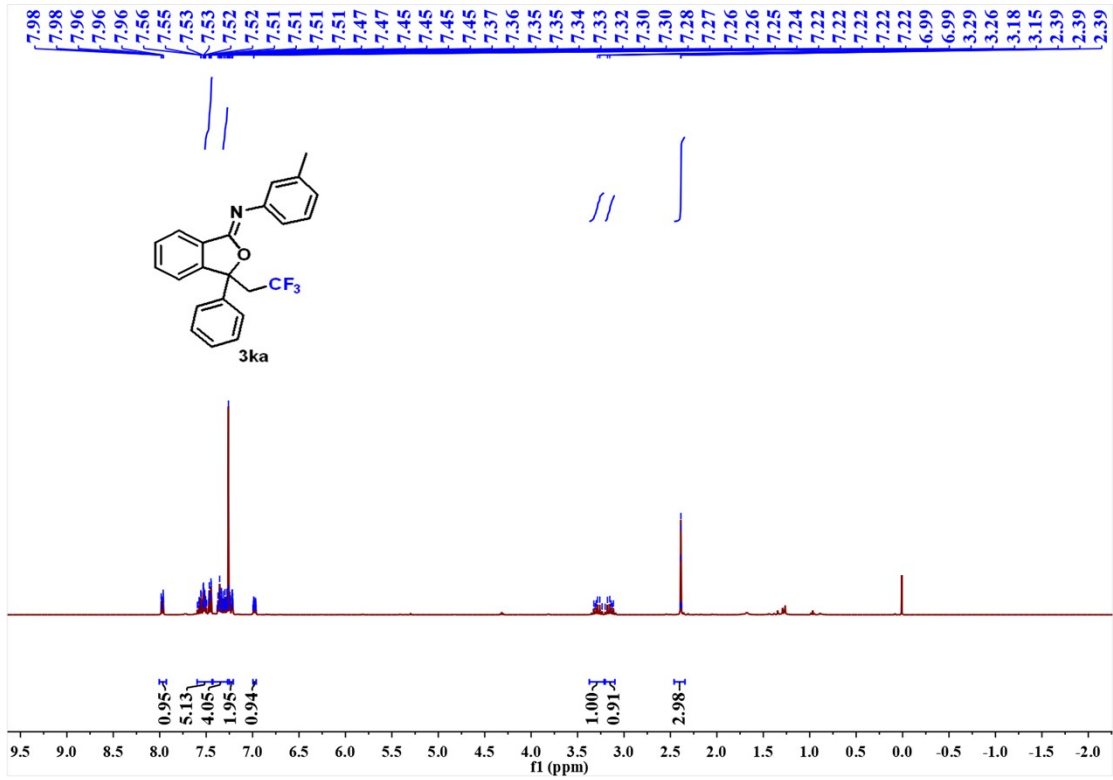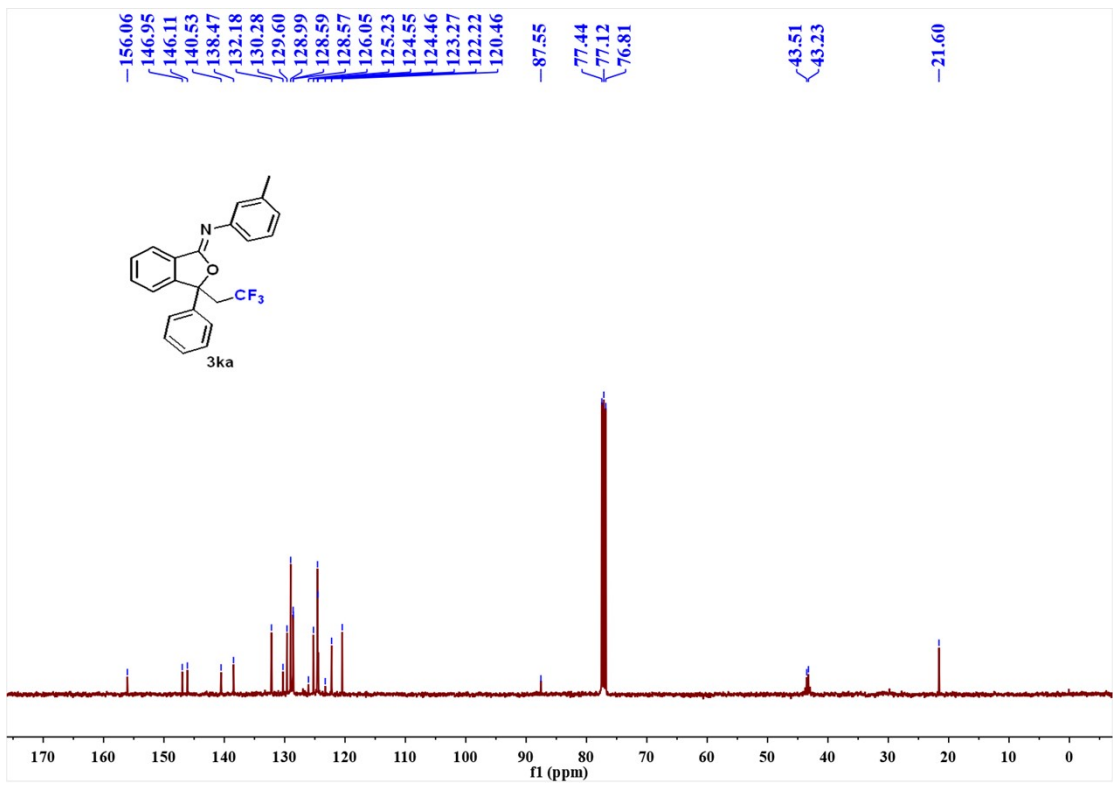

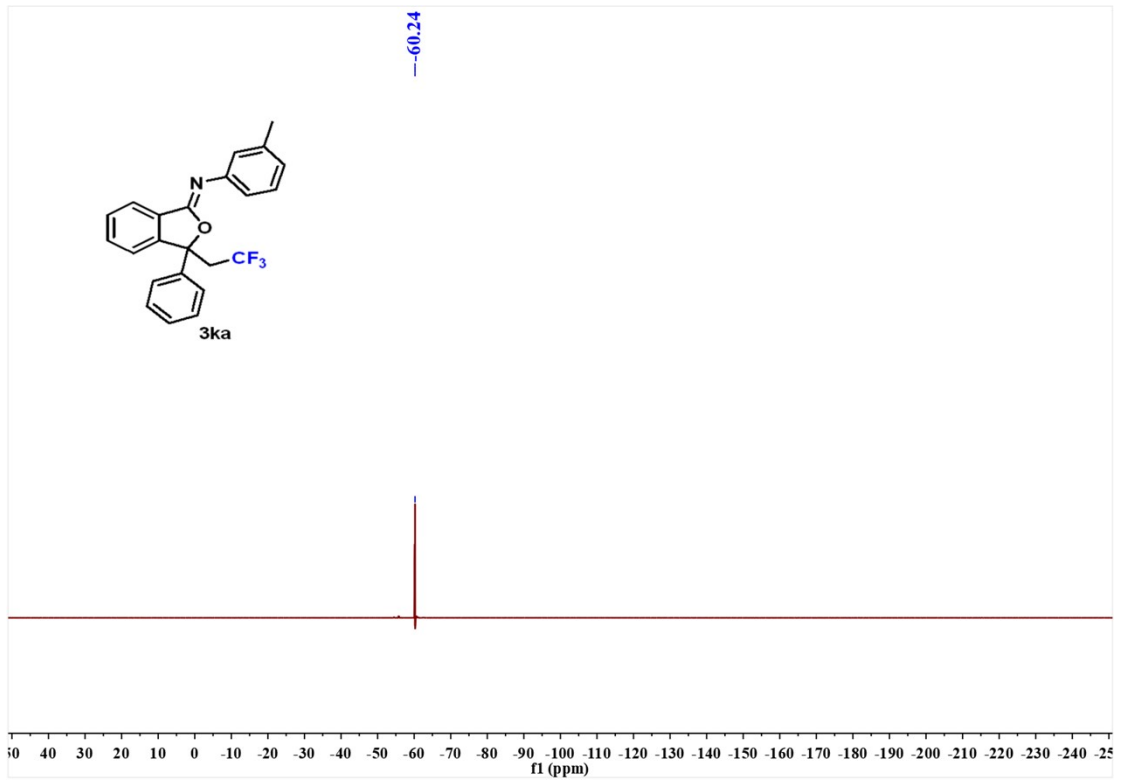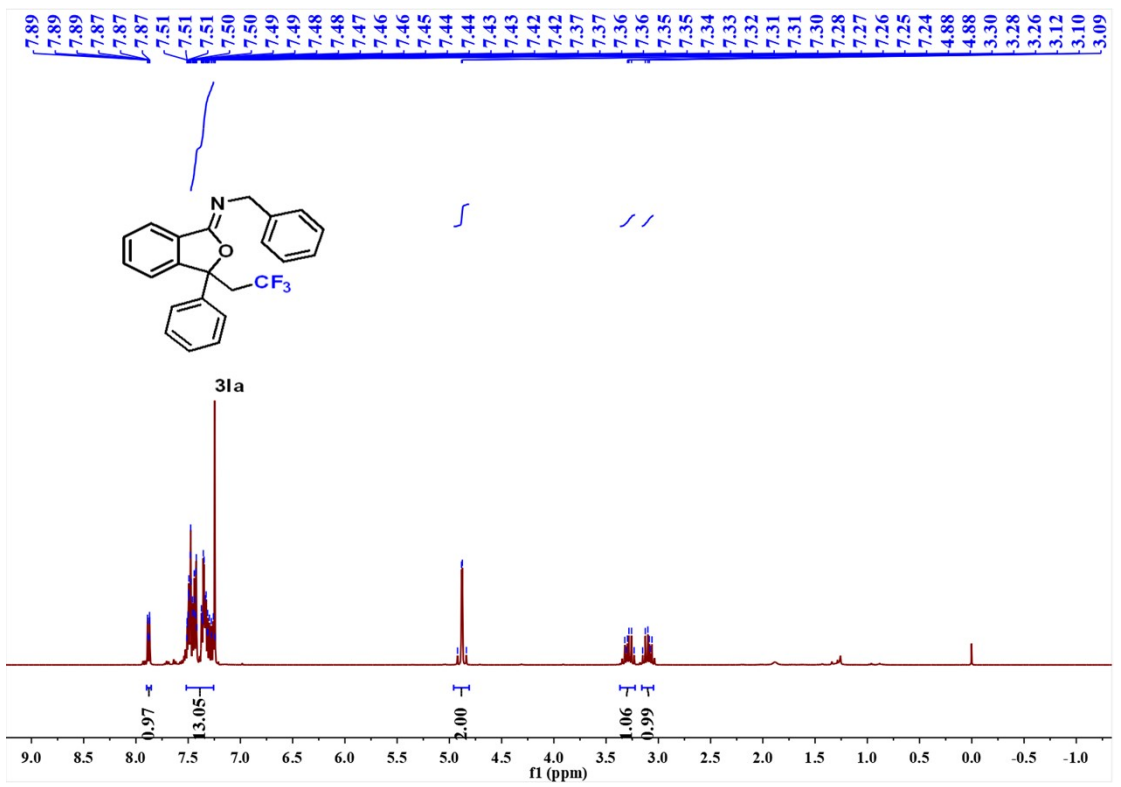

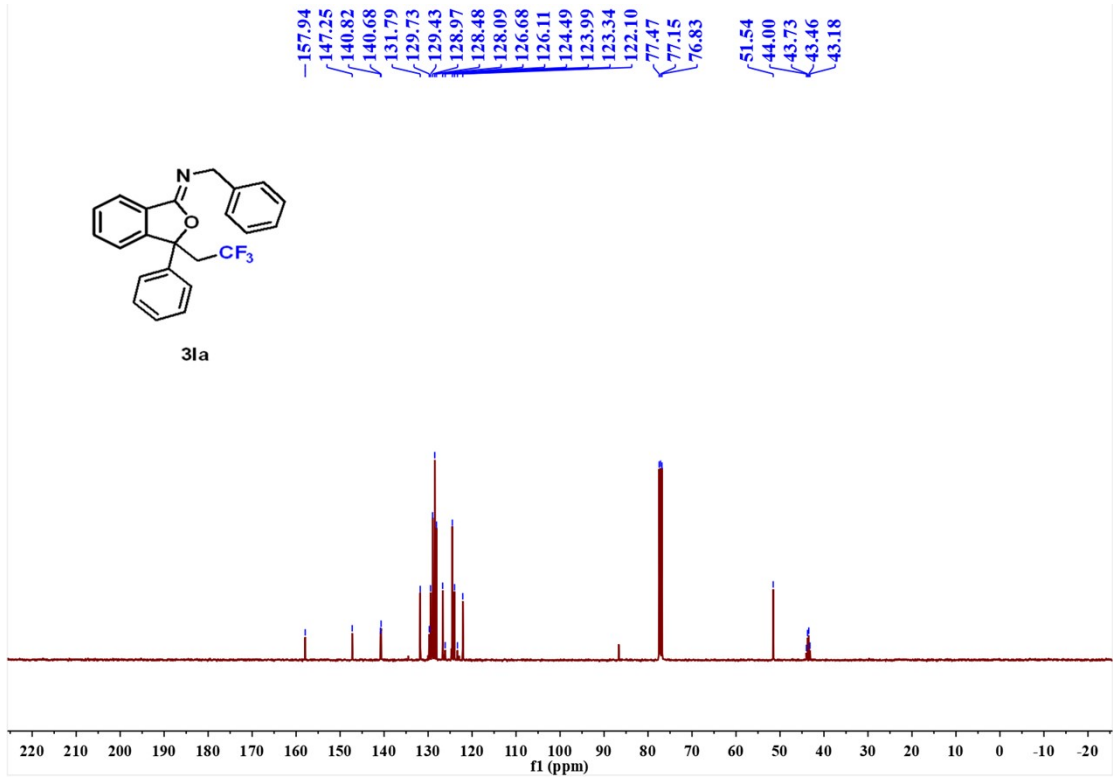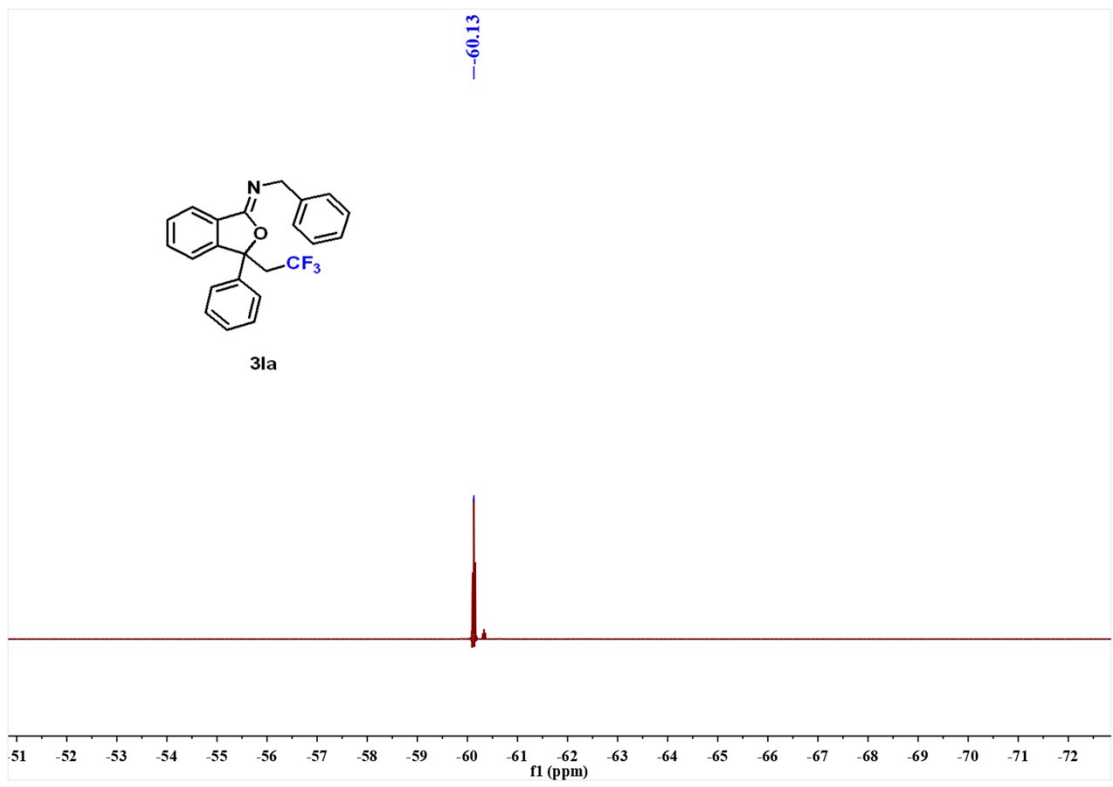



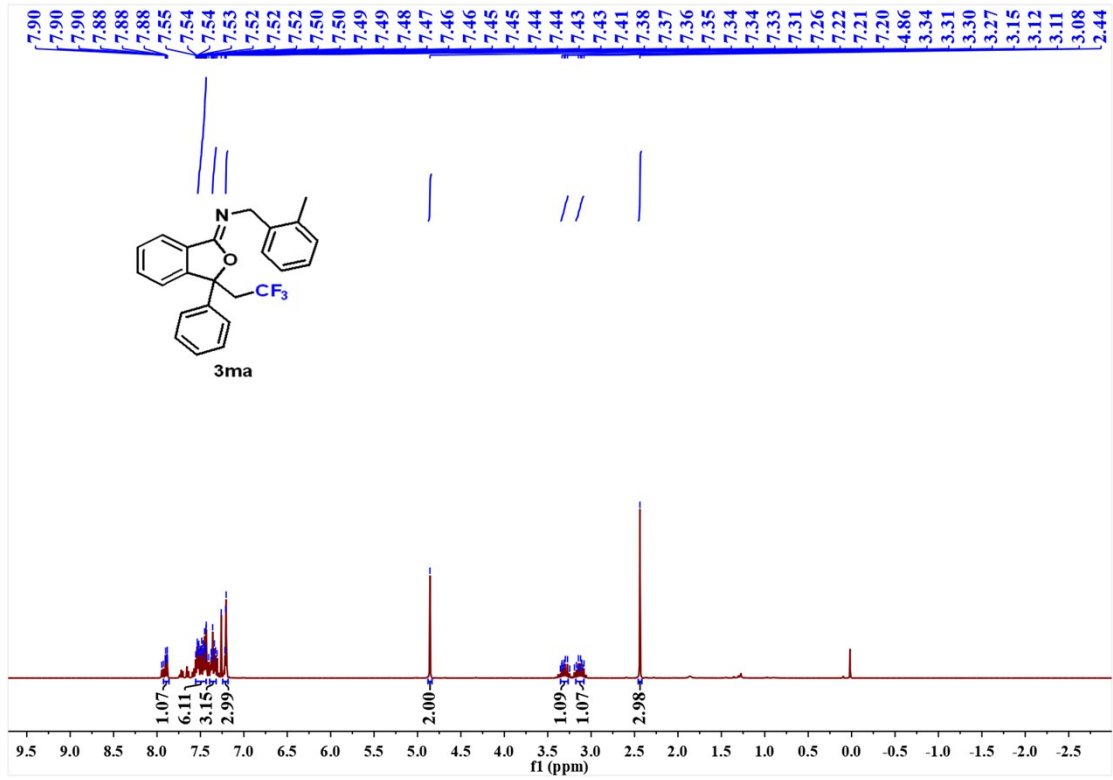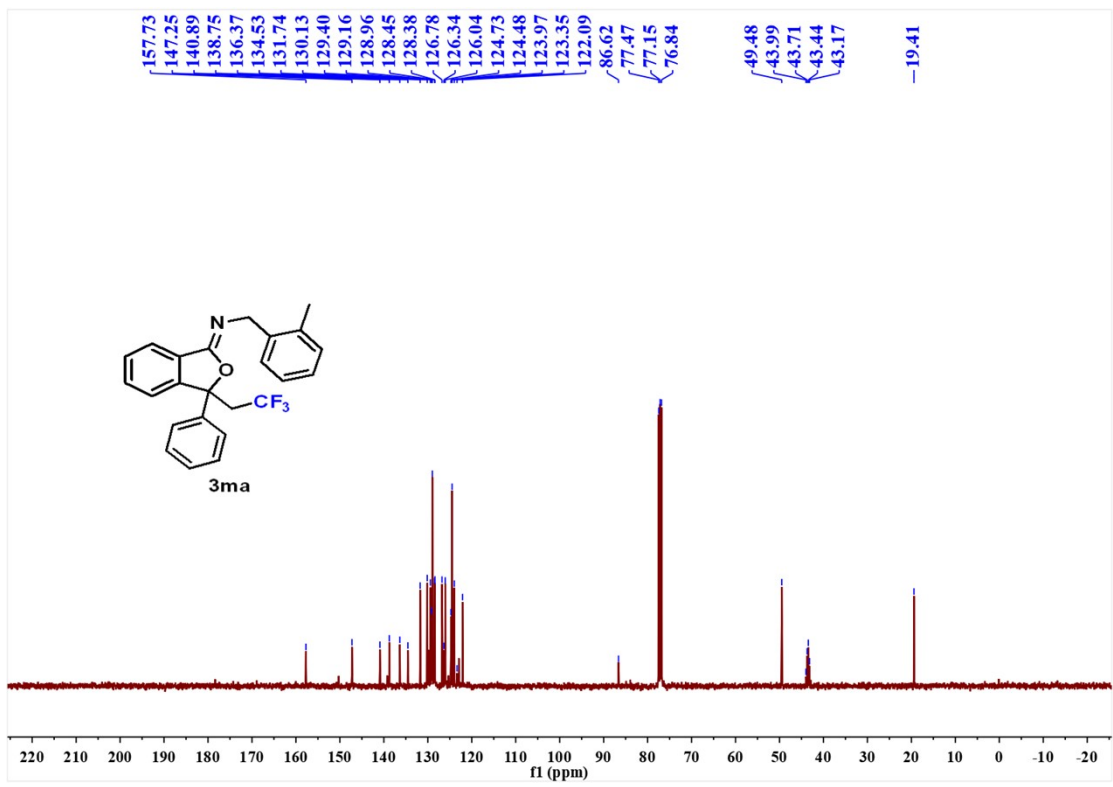

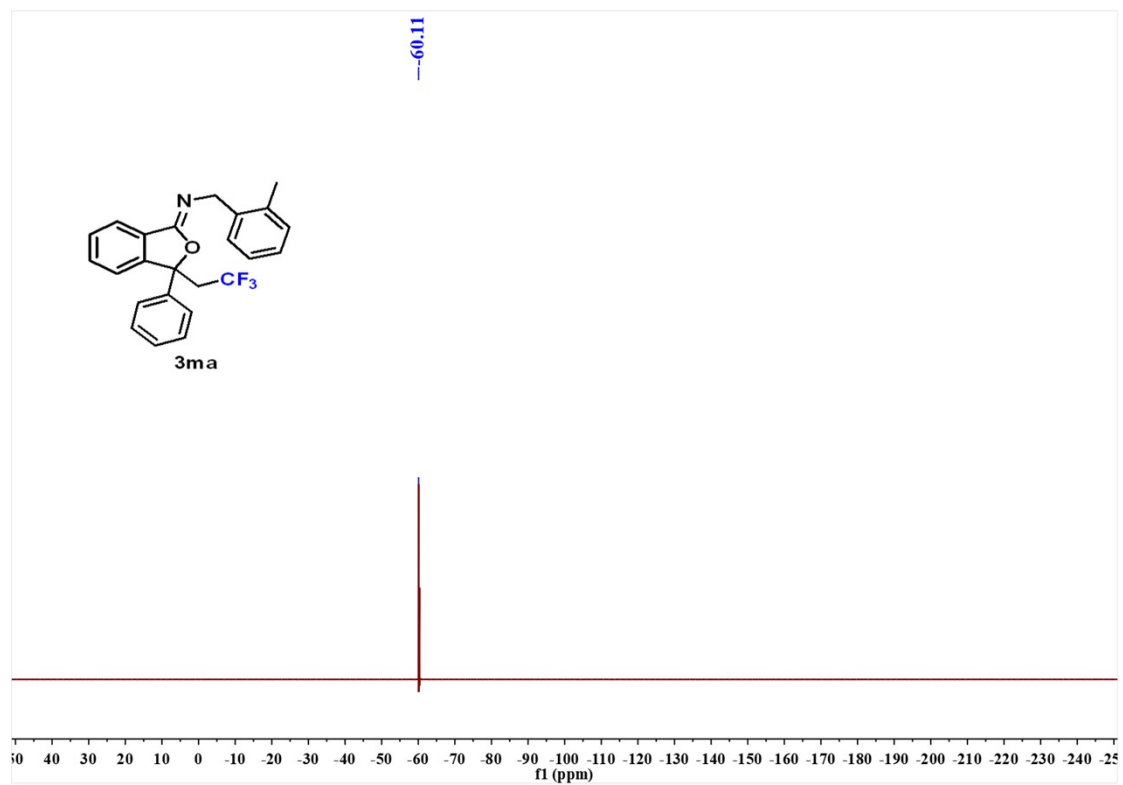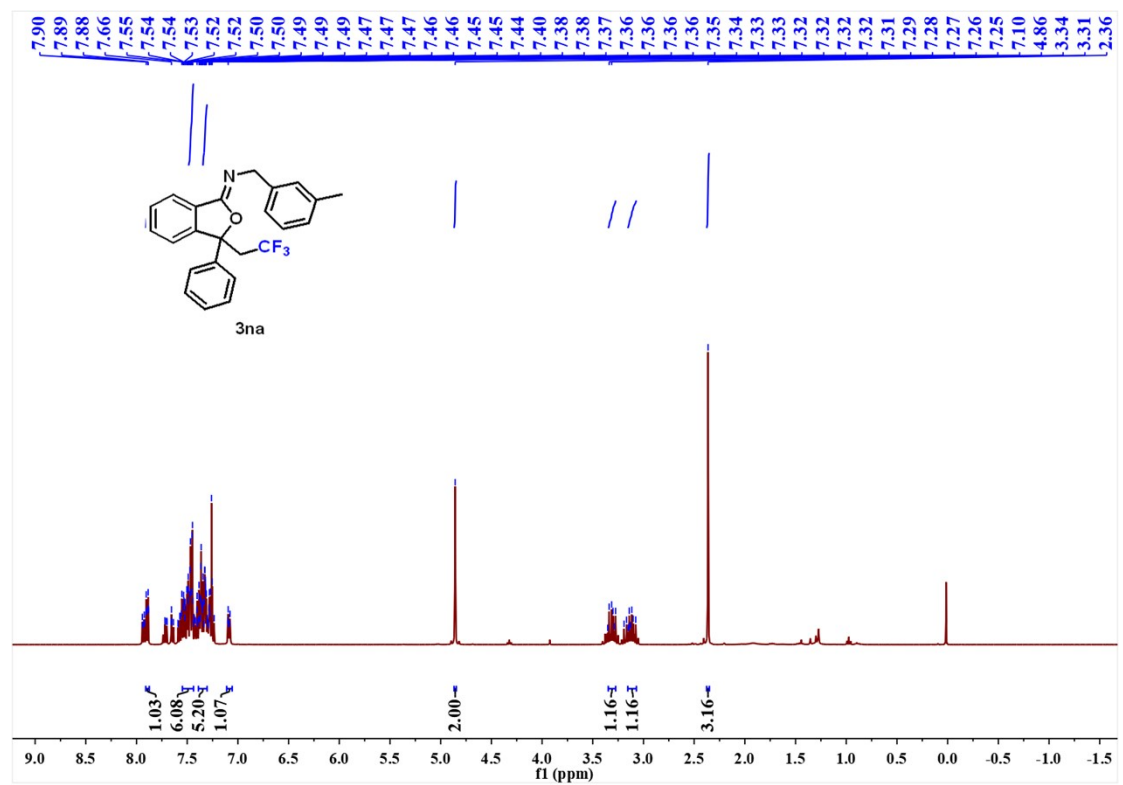

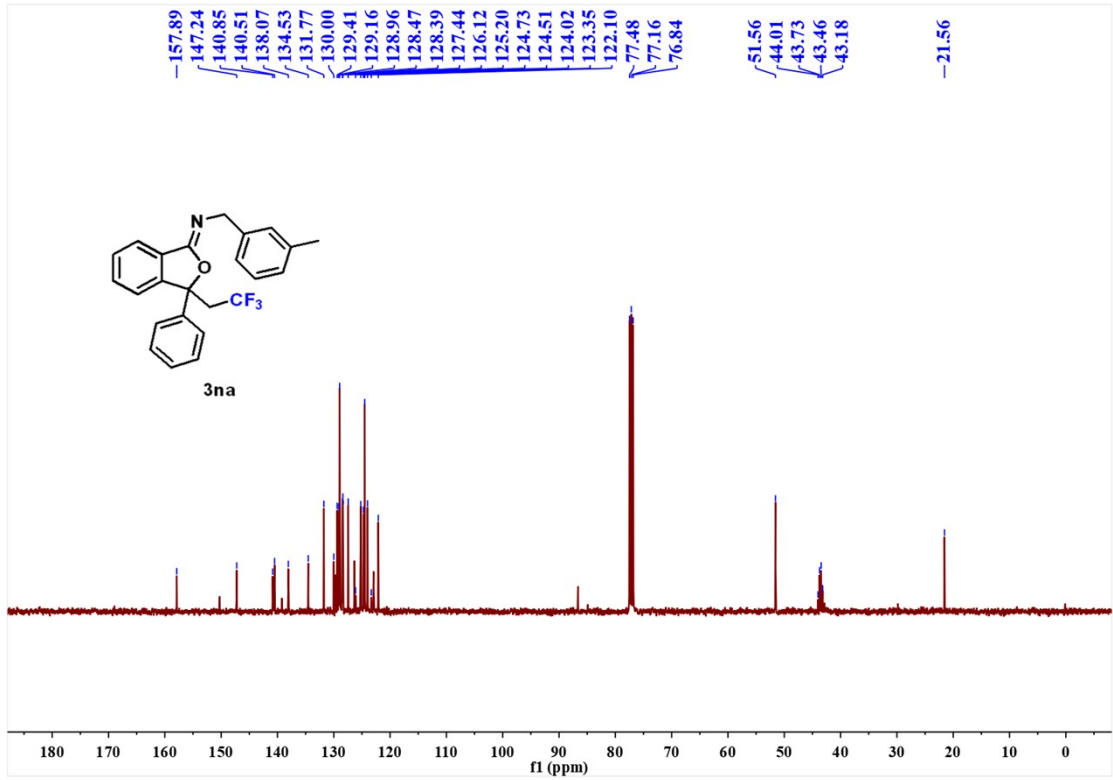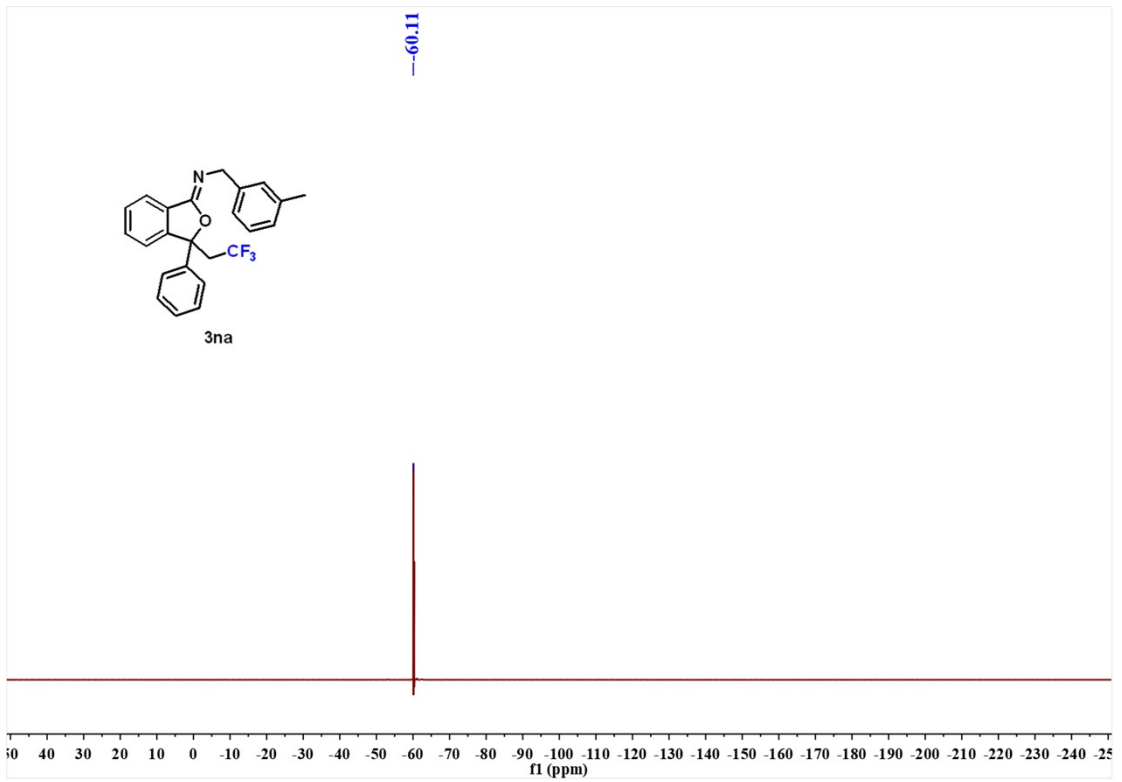

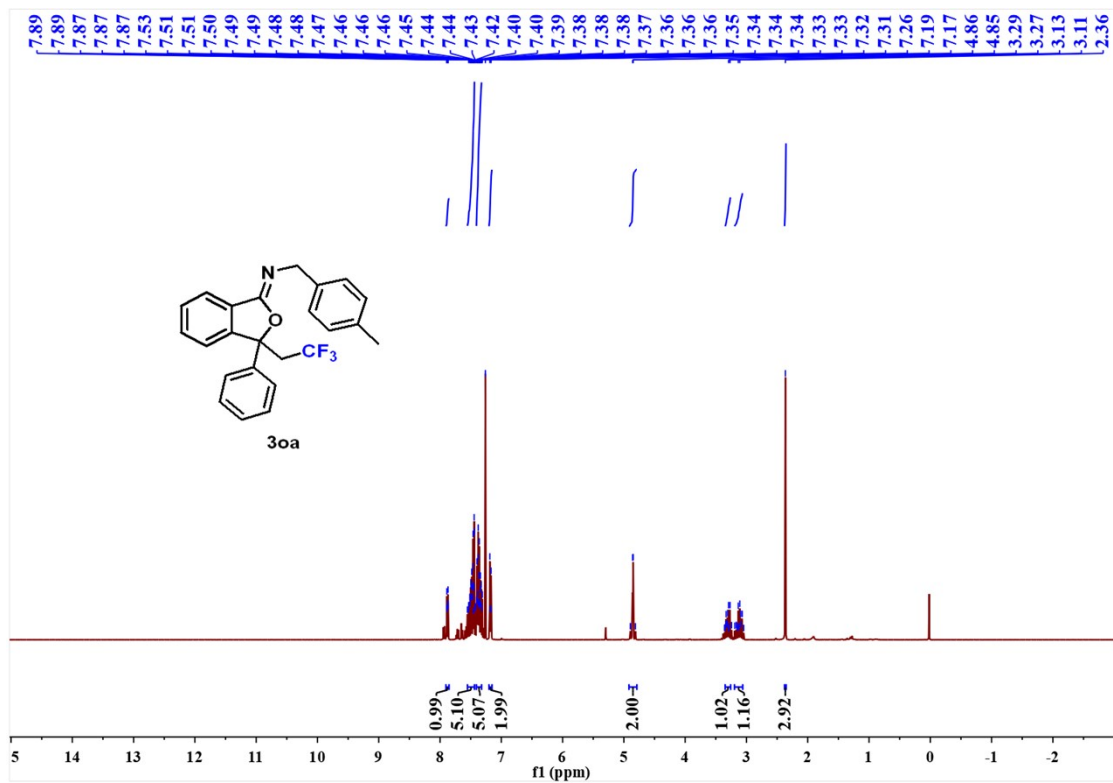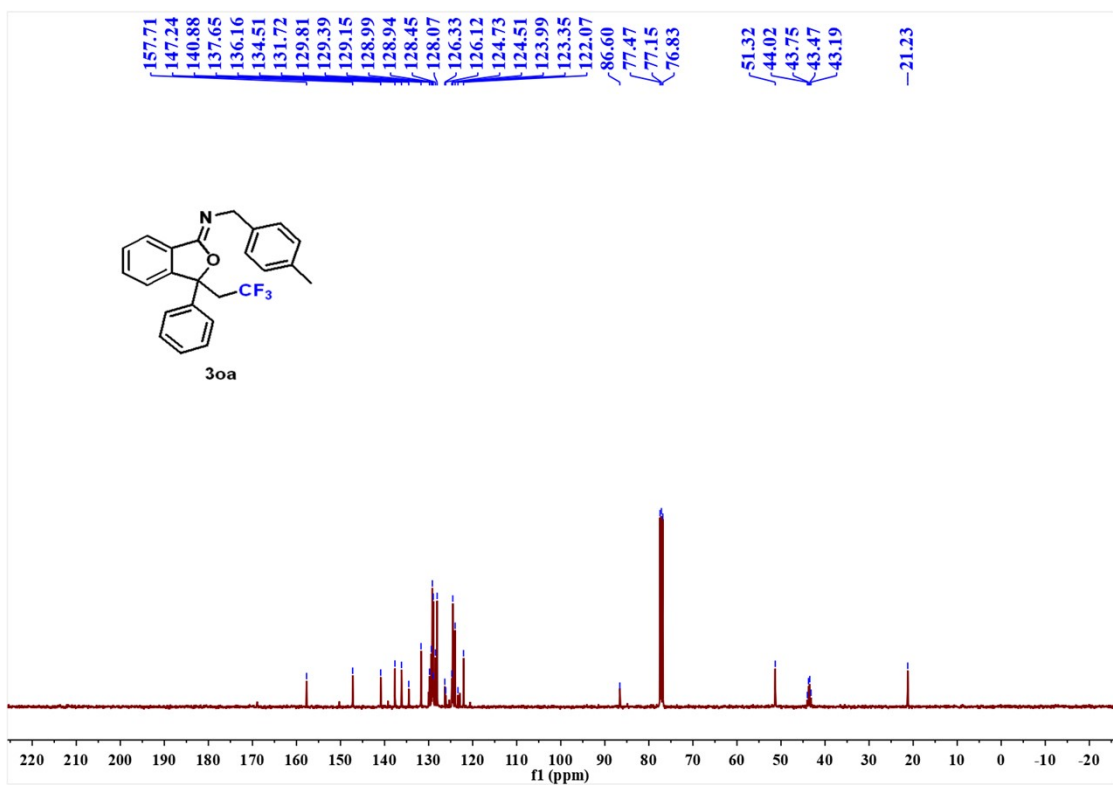

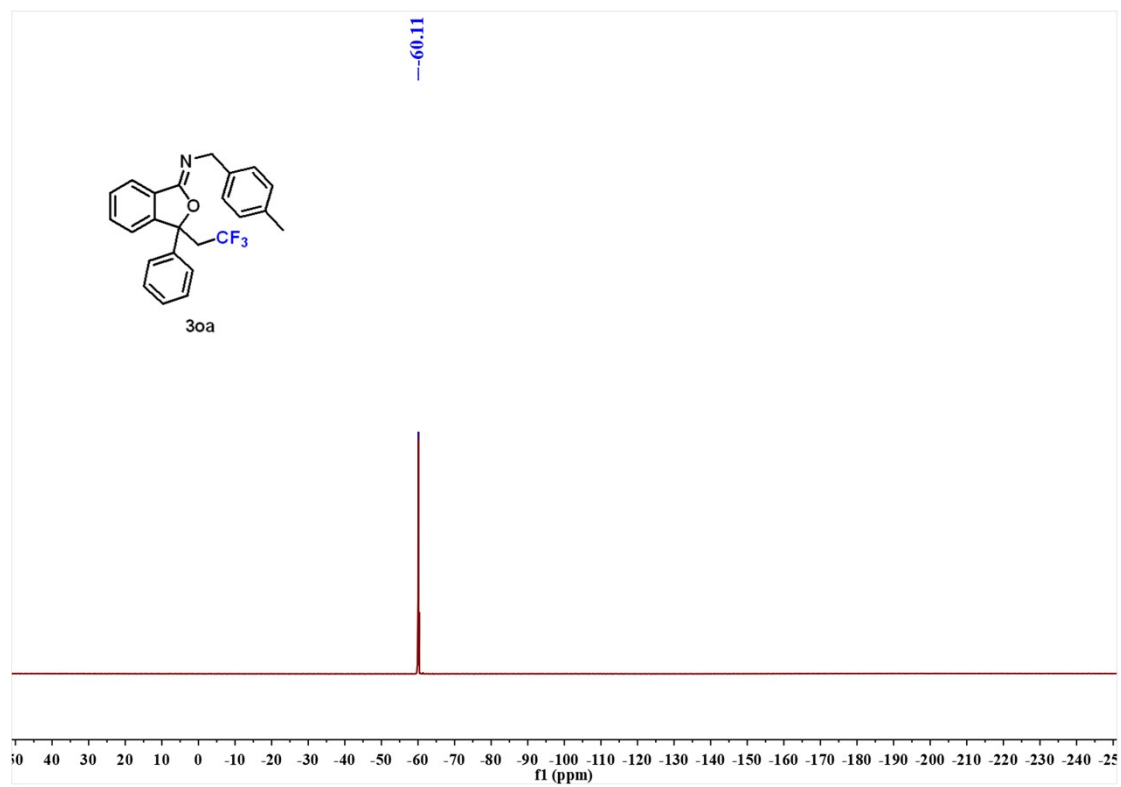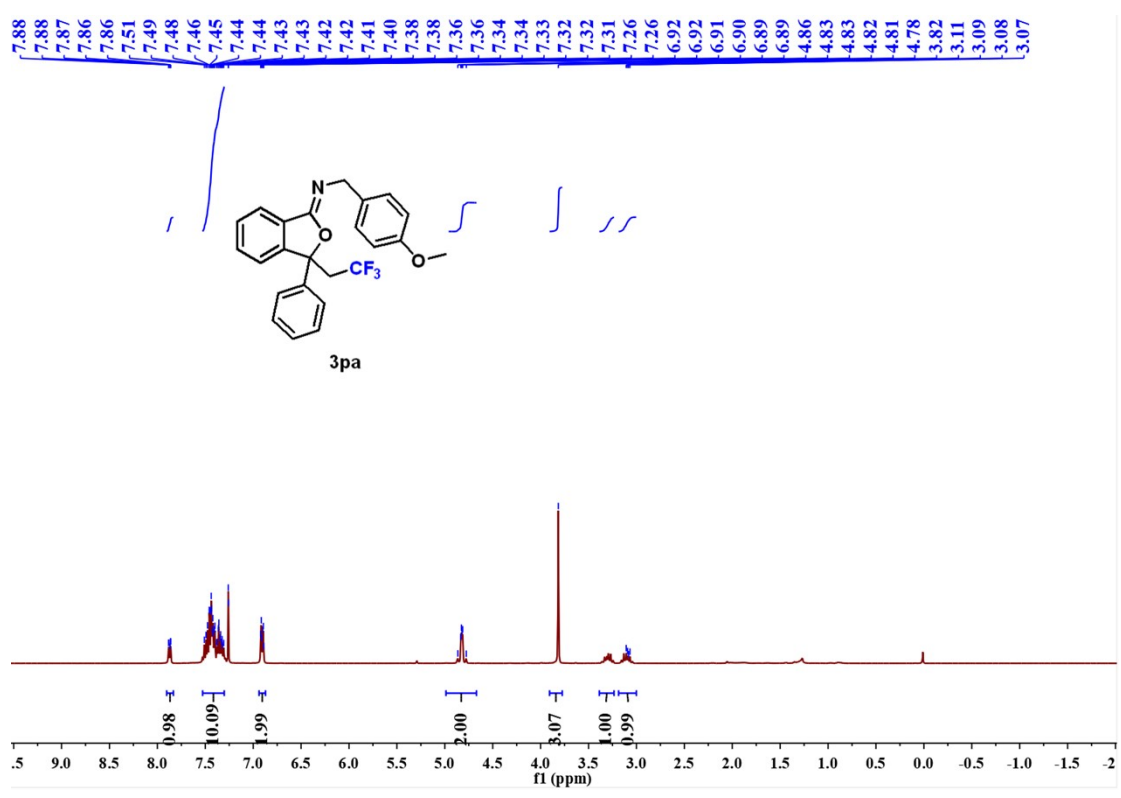

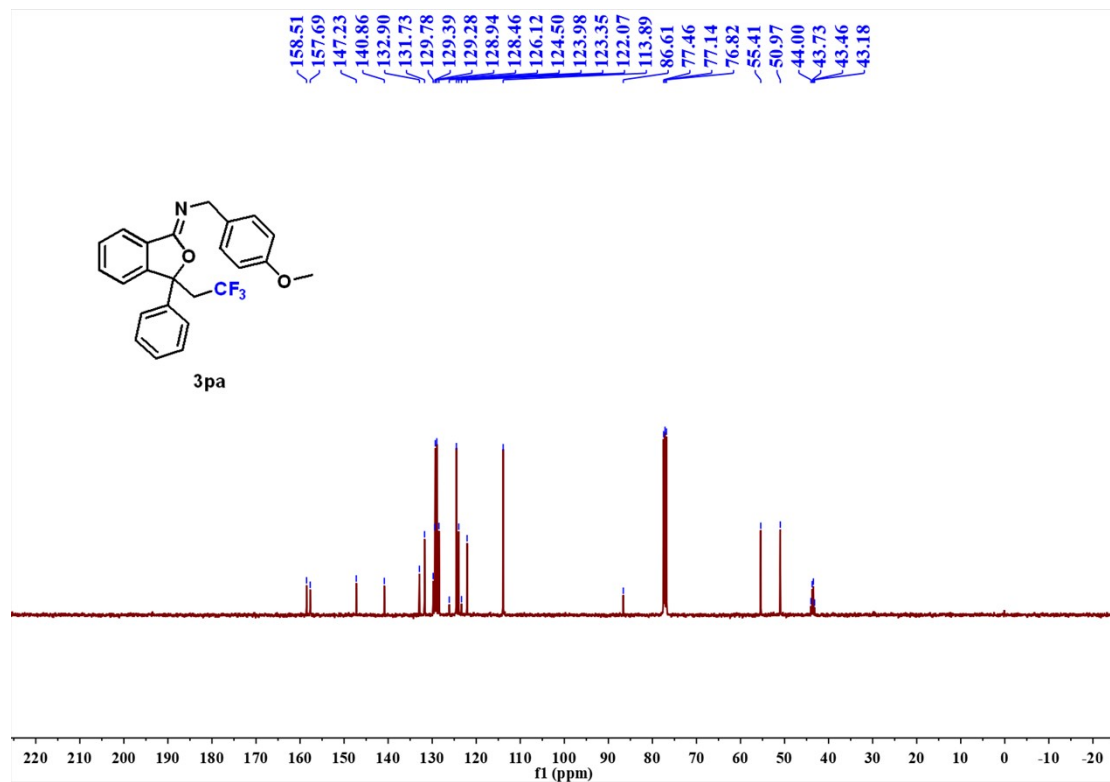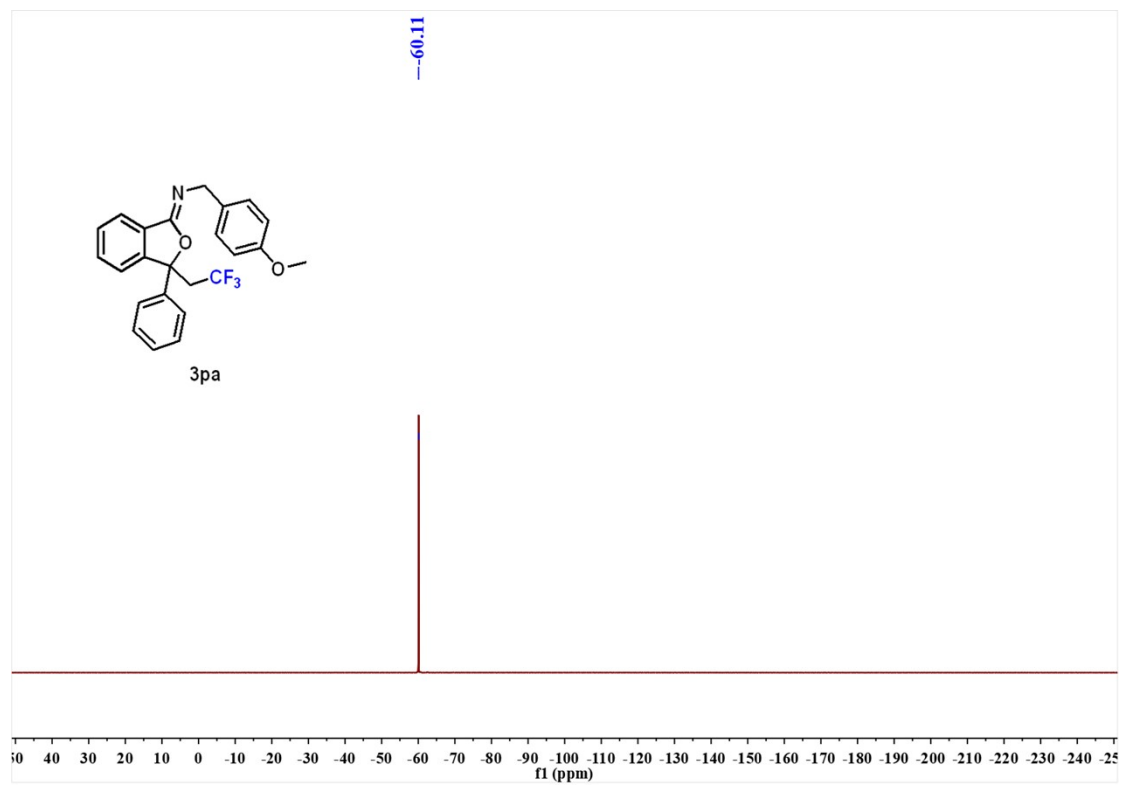

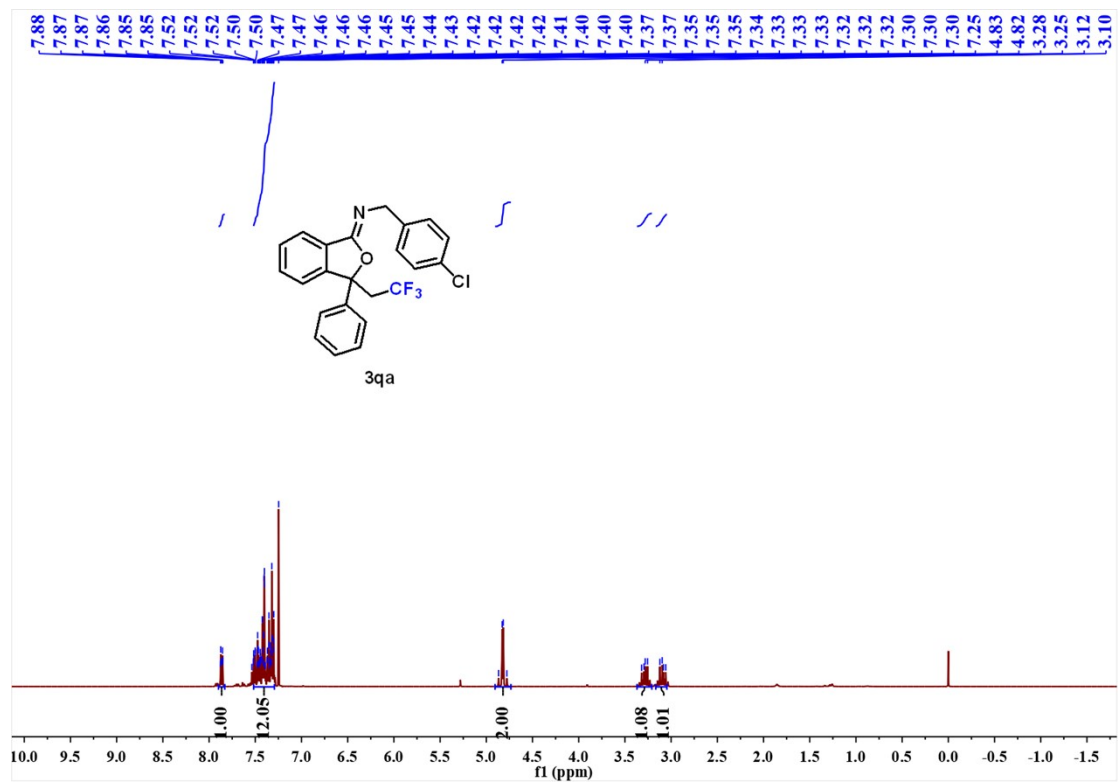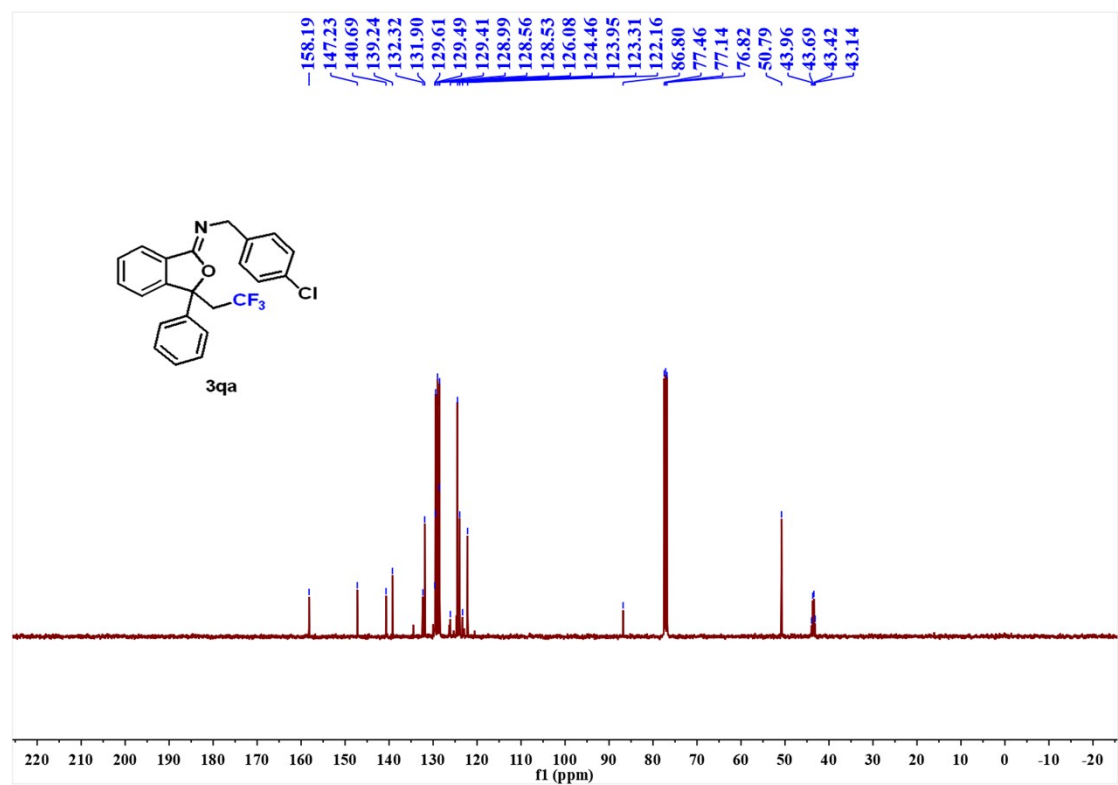

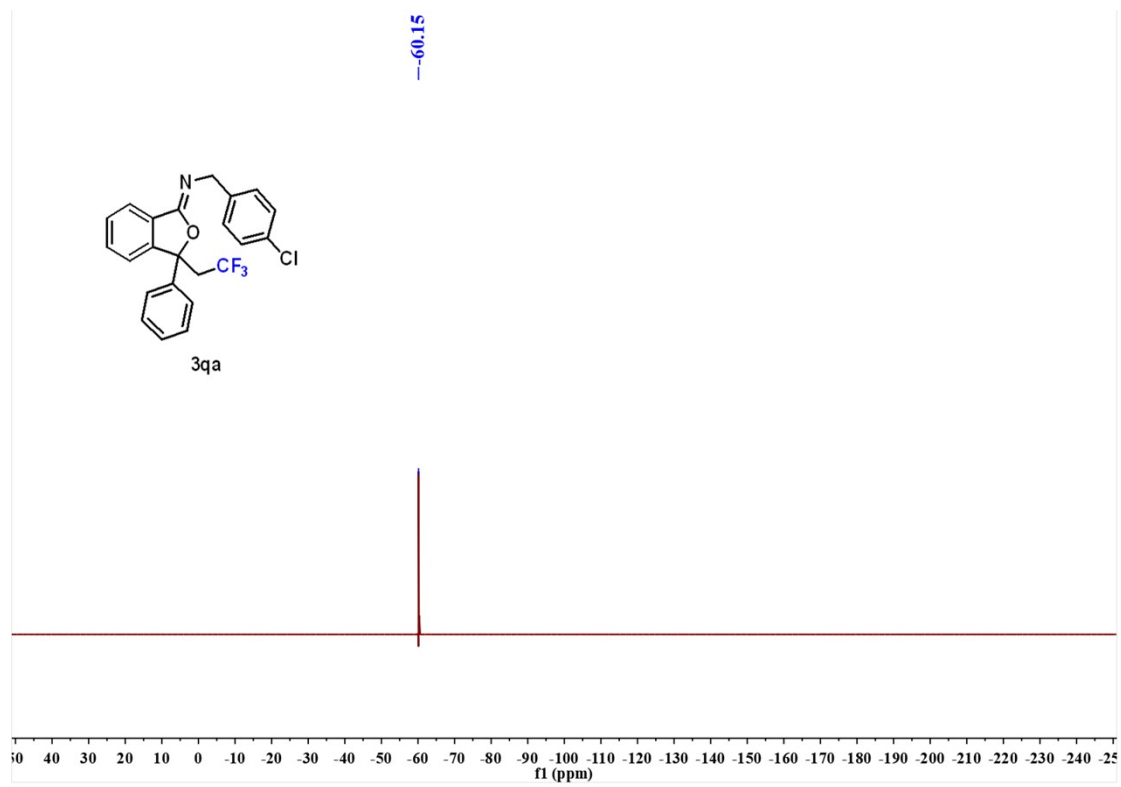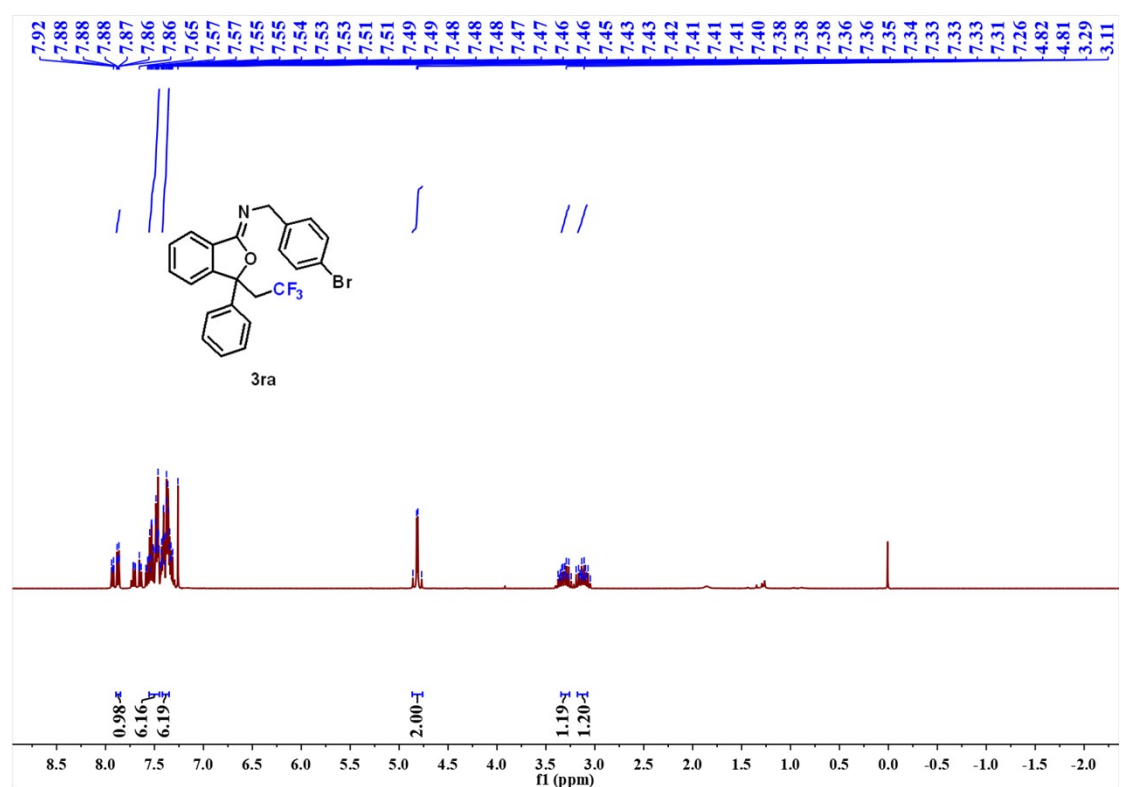



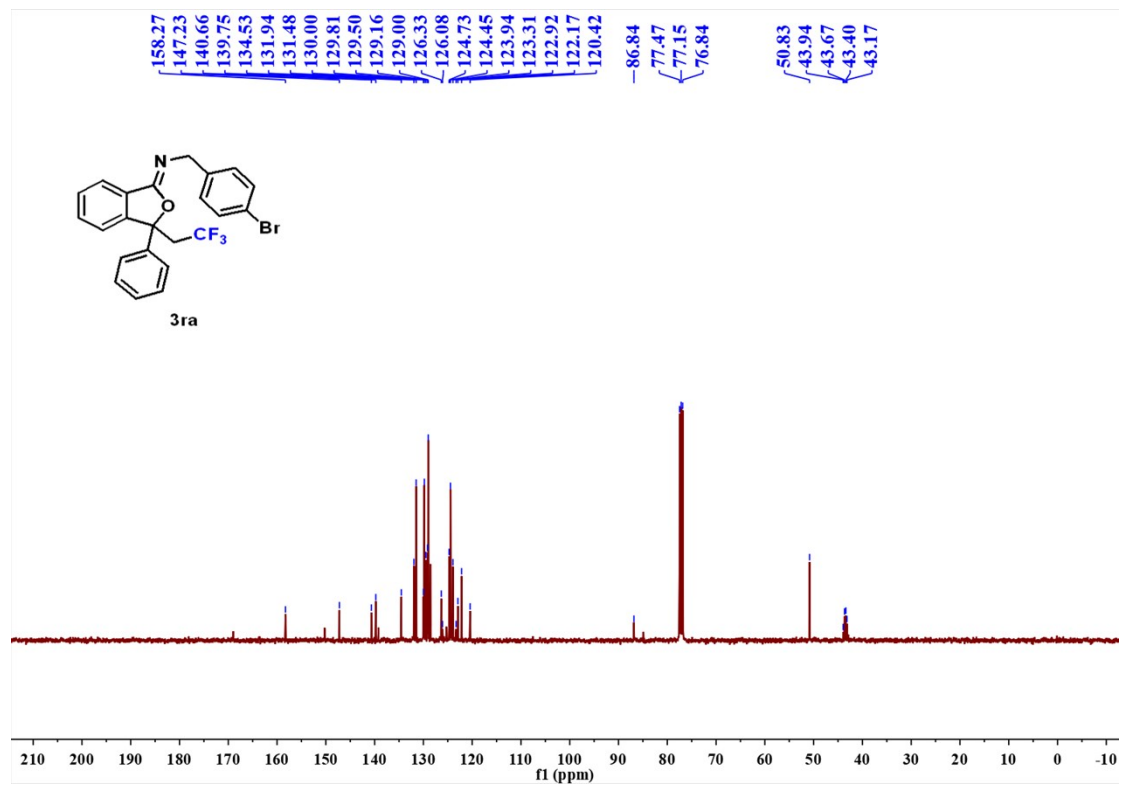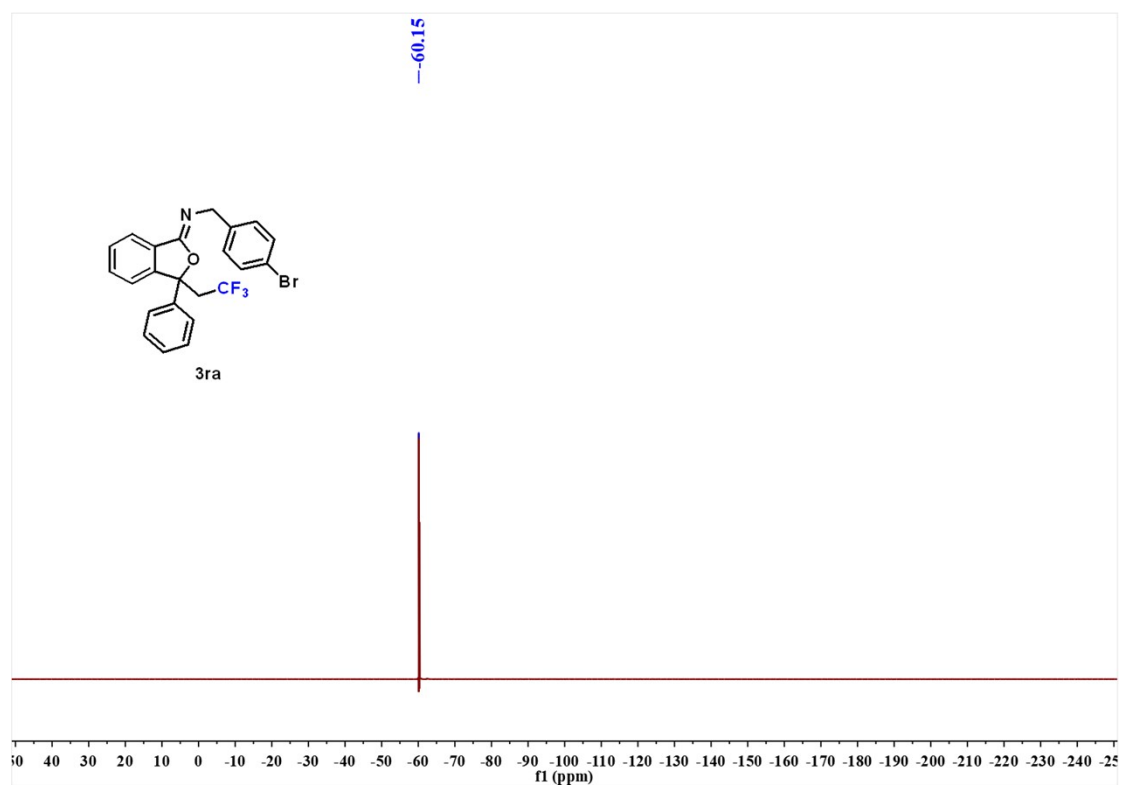

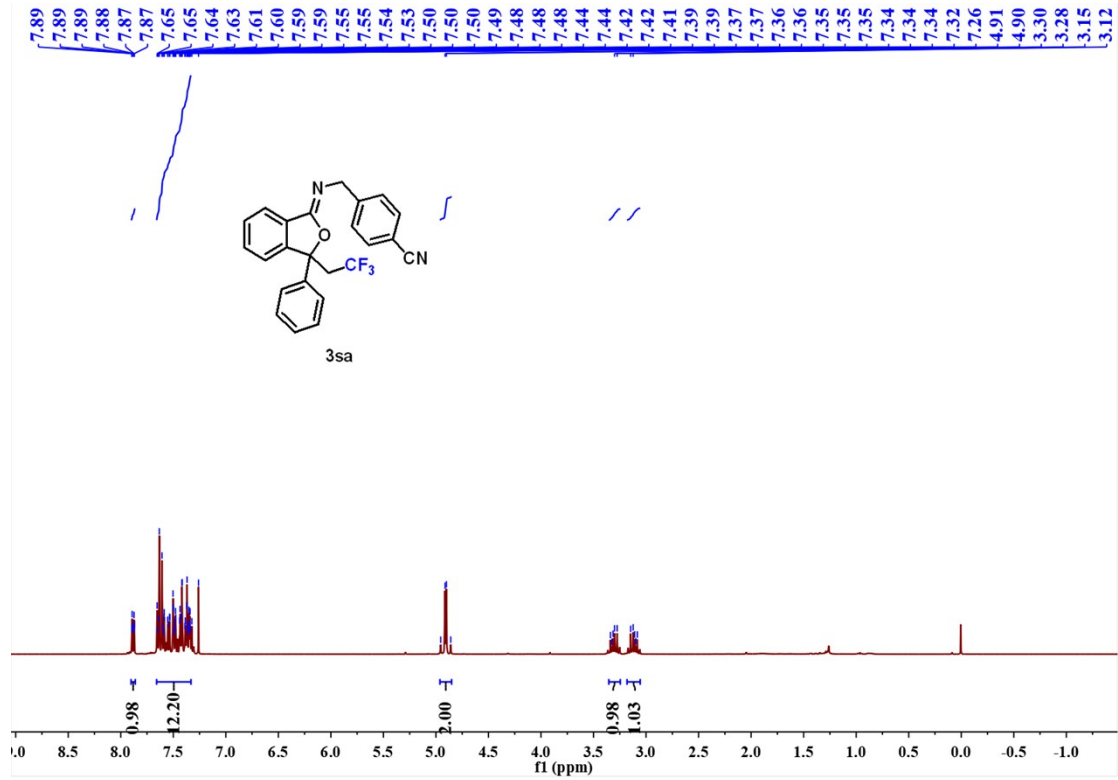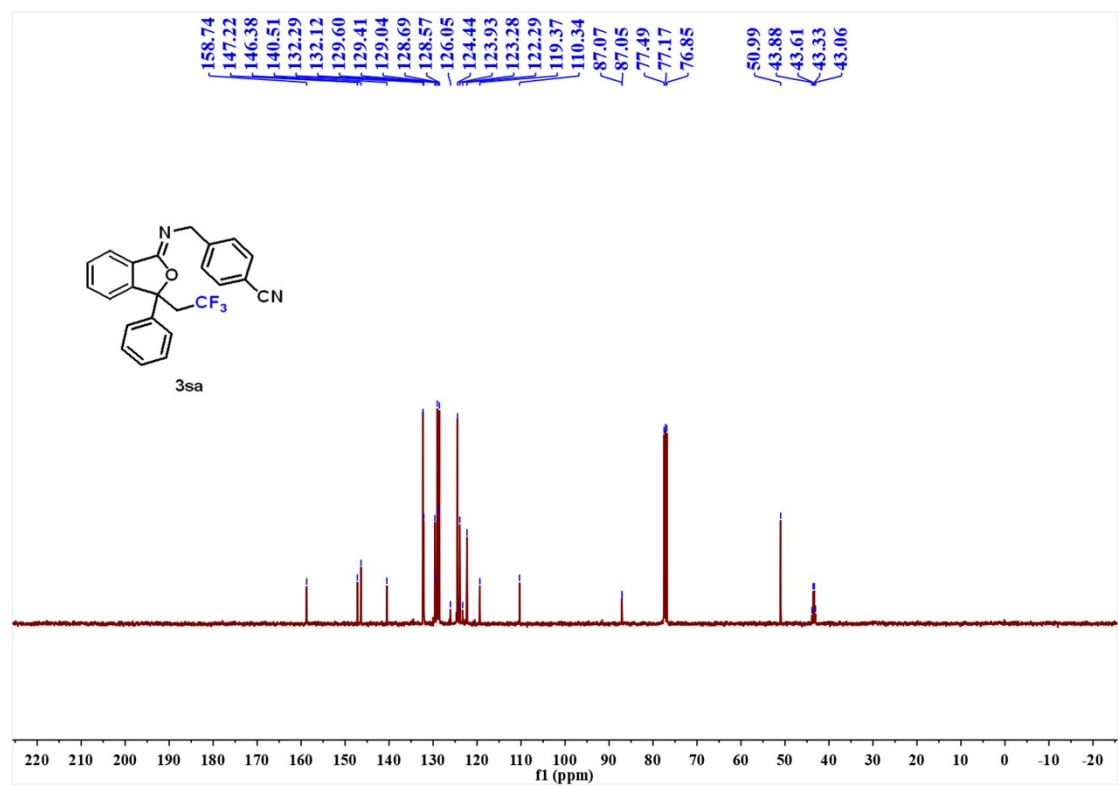

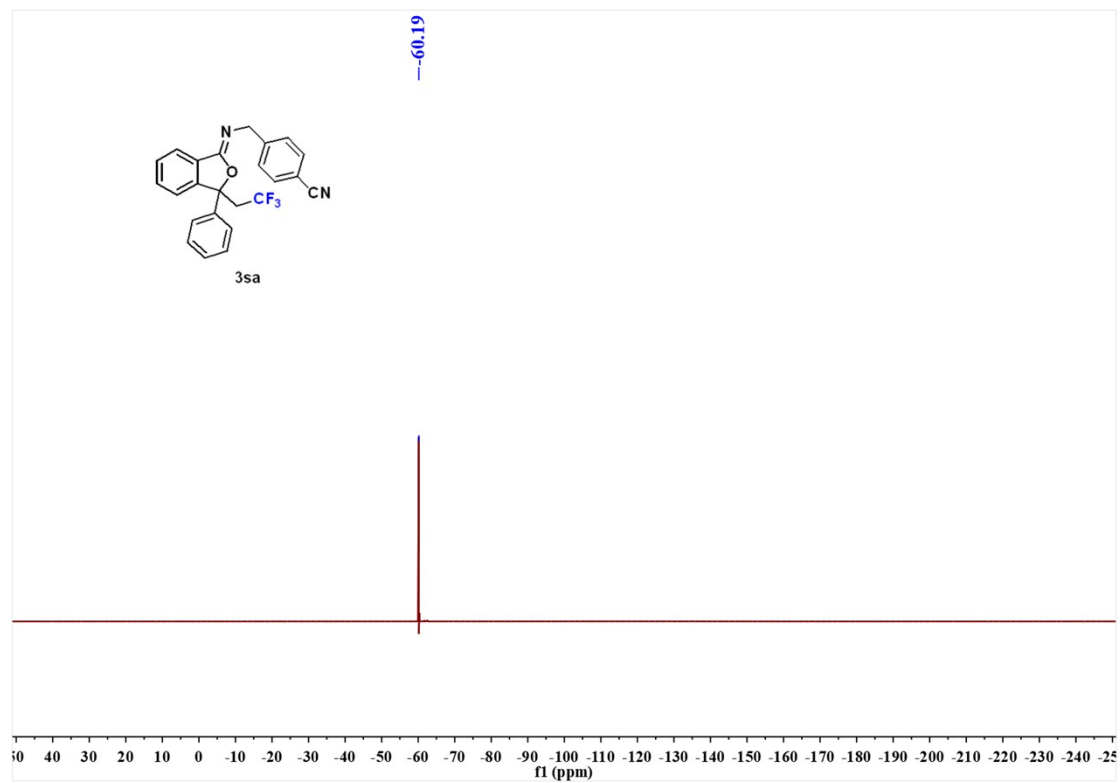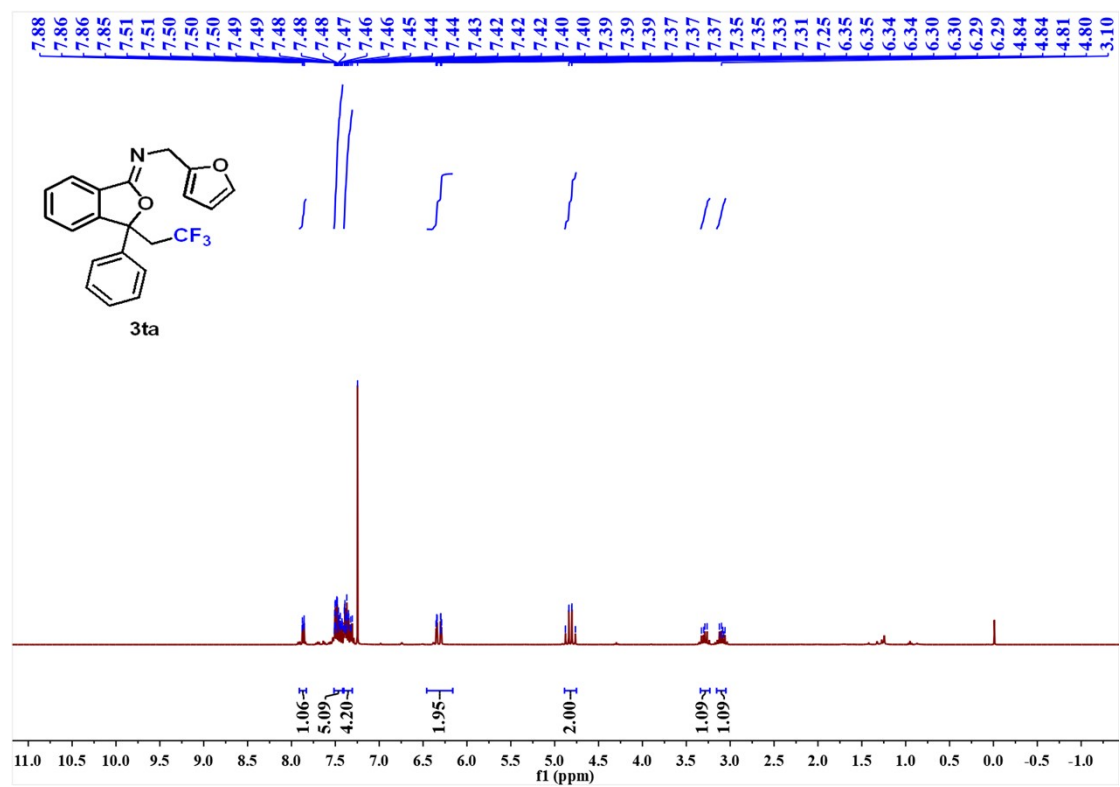

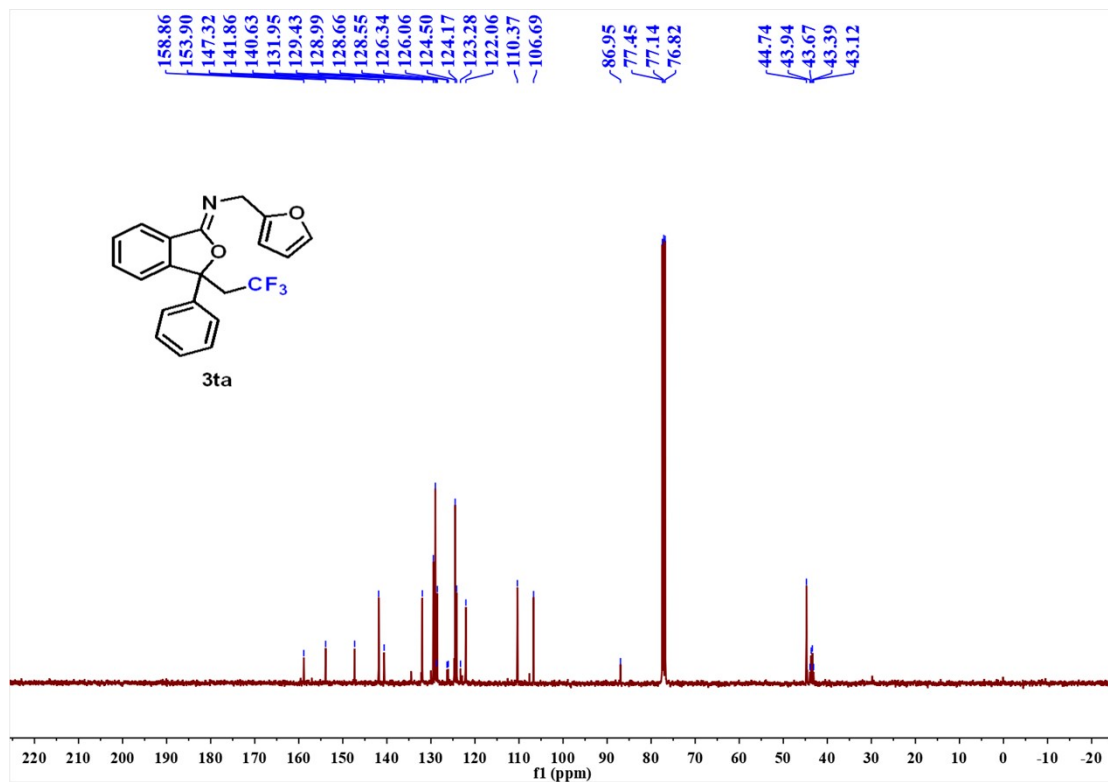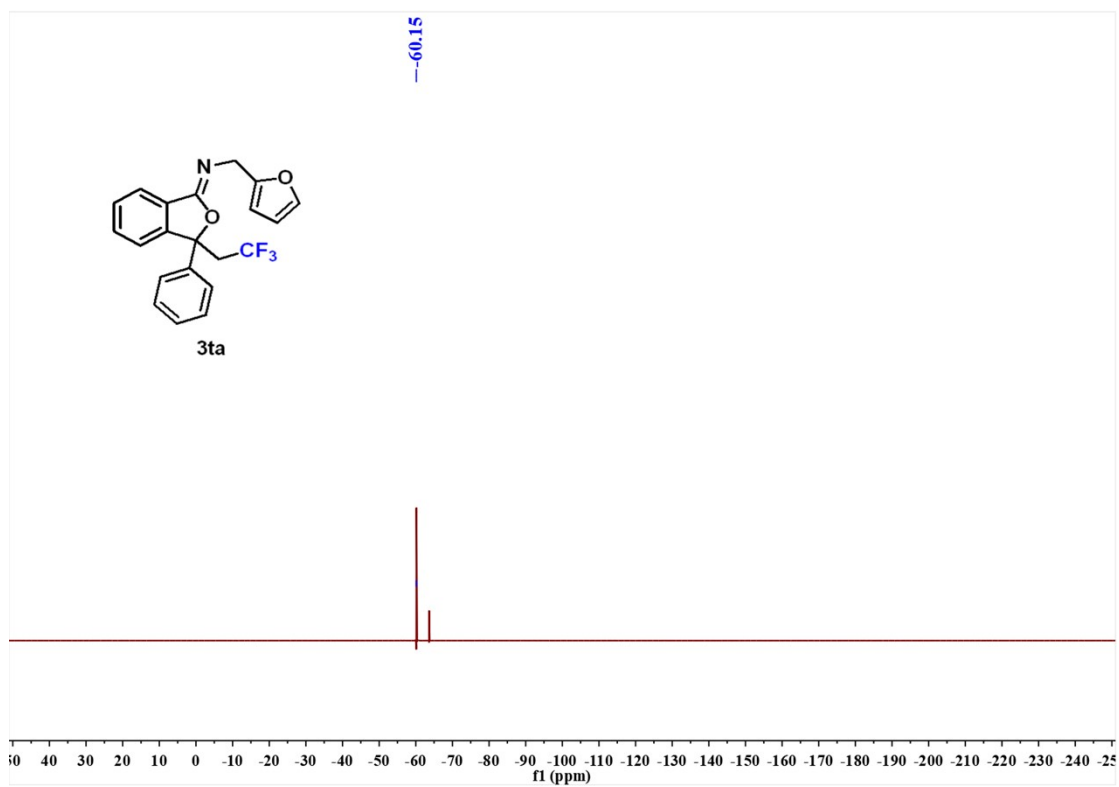

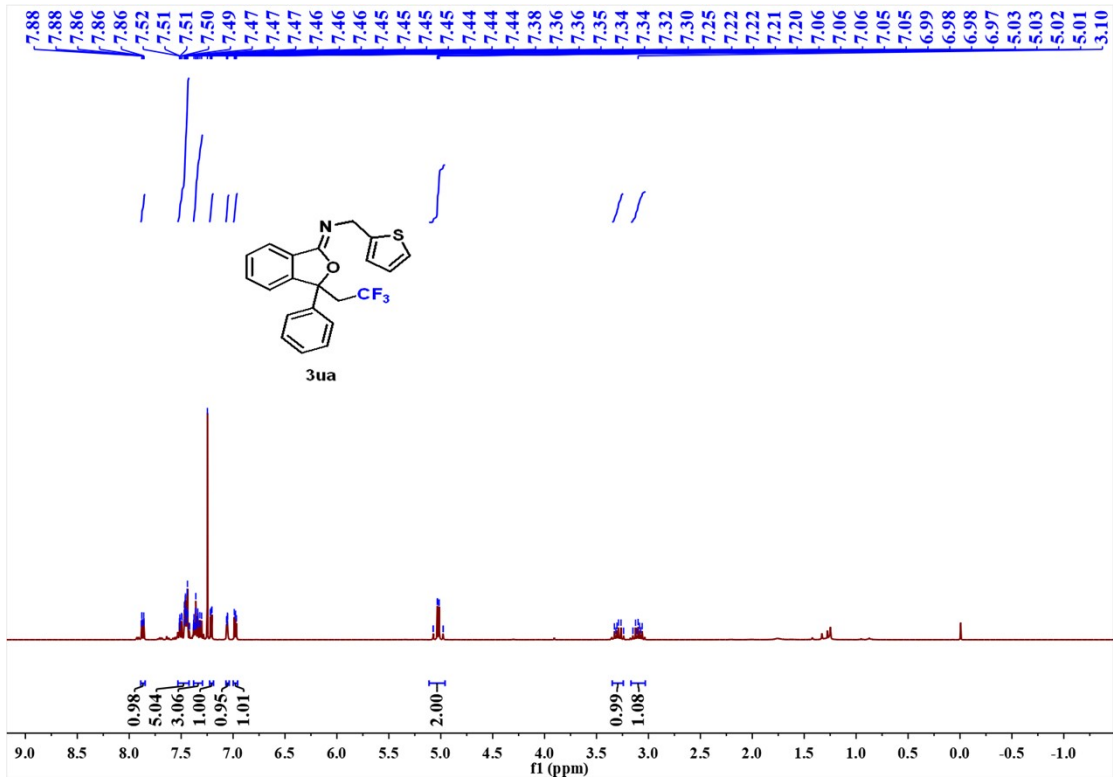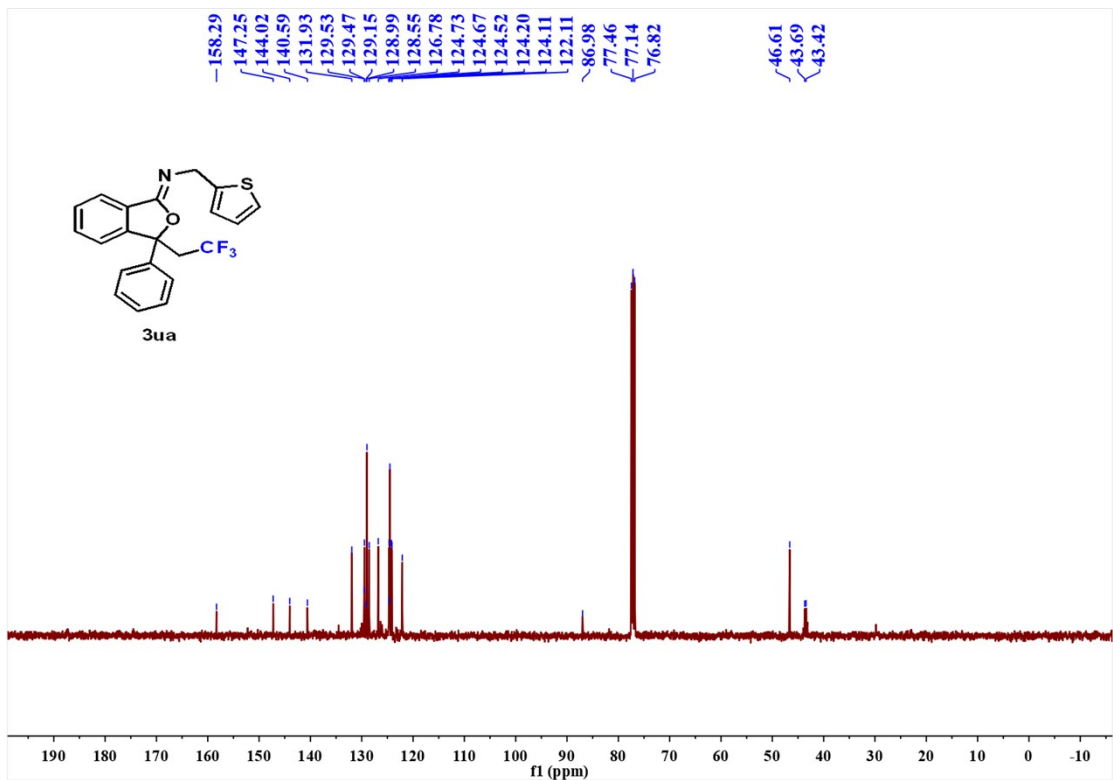

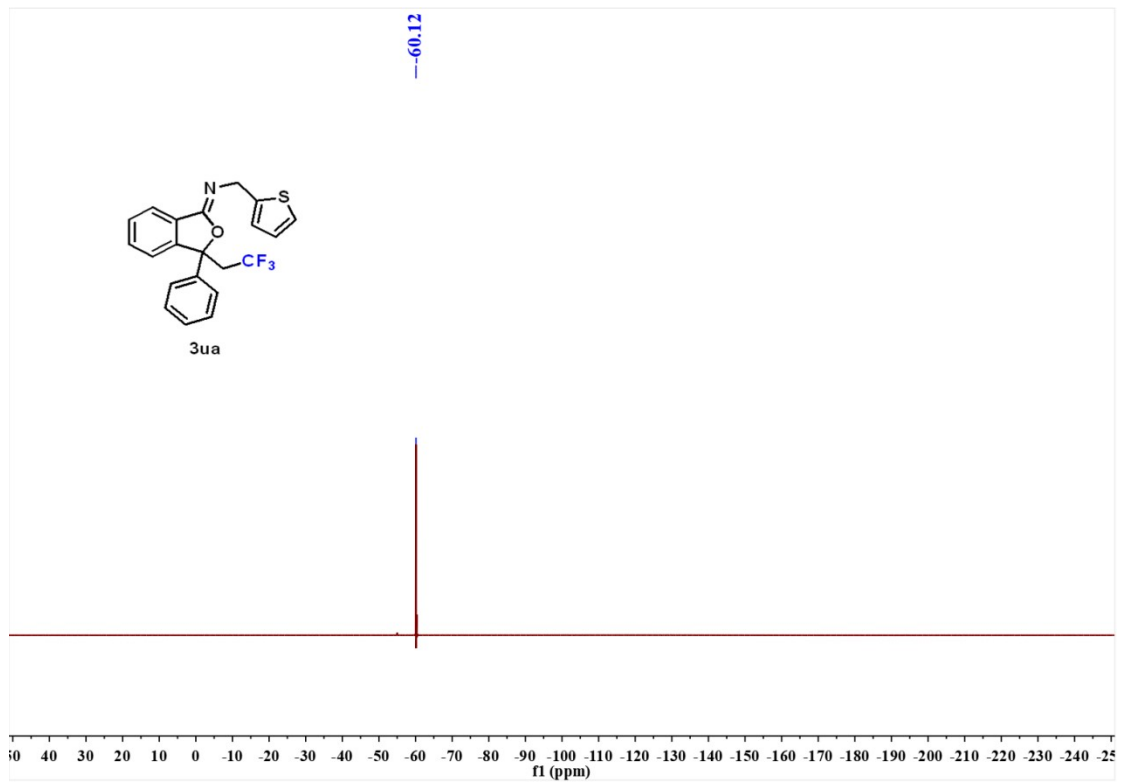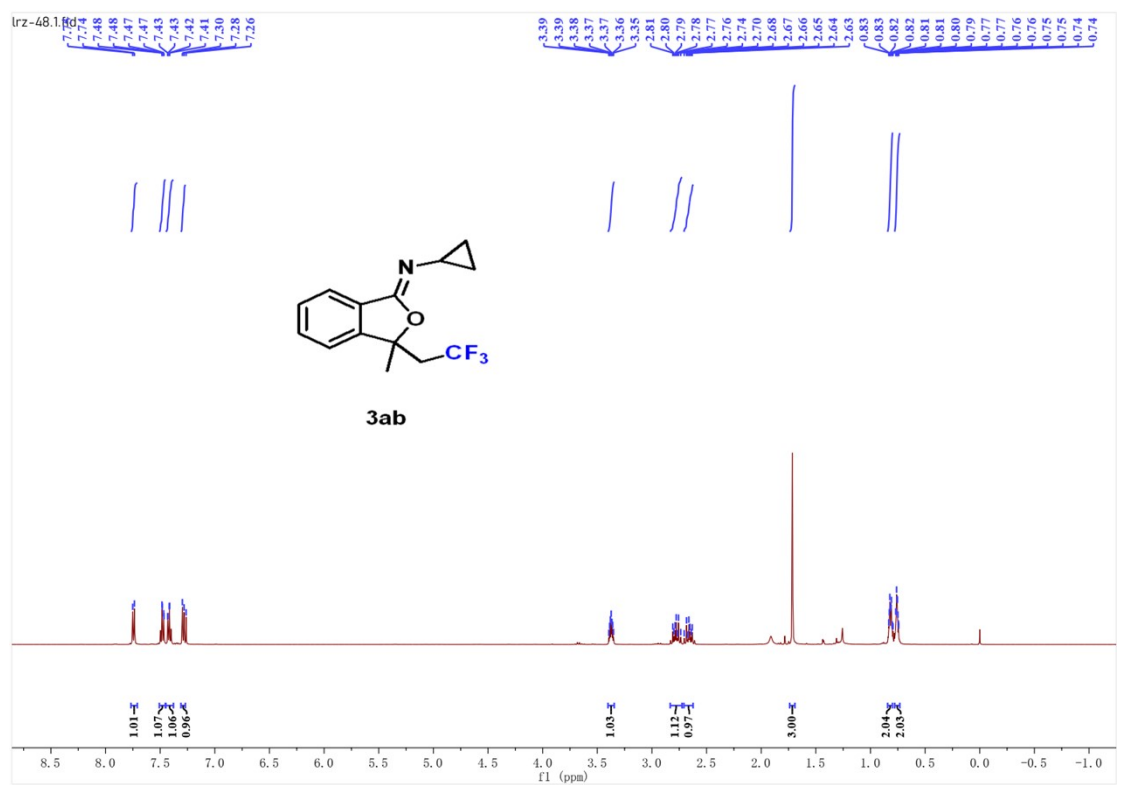

lrz-48.2.fid

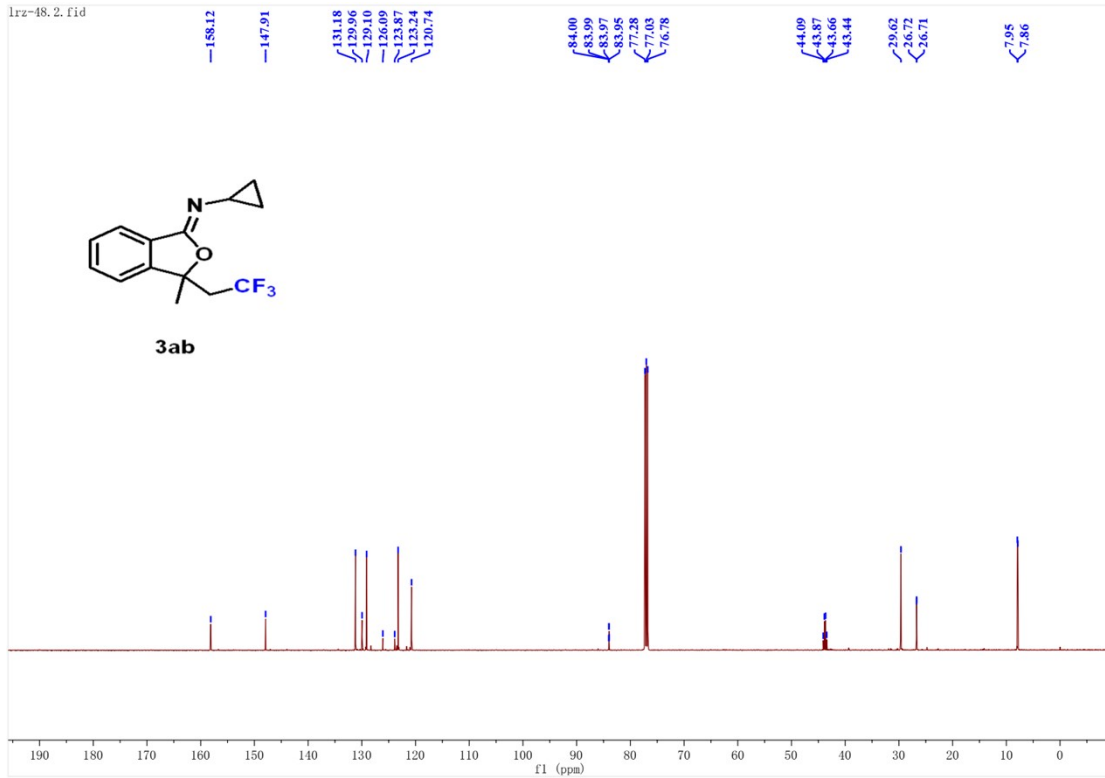

48.3.fid  
lrz-48-ctf

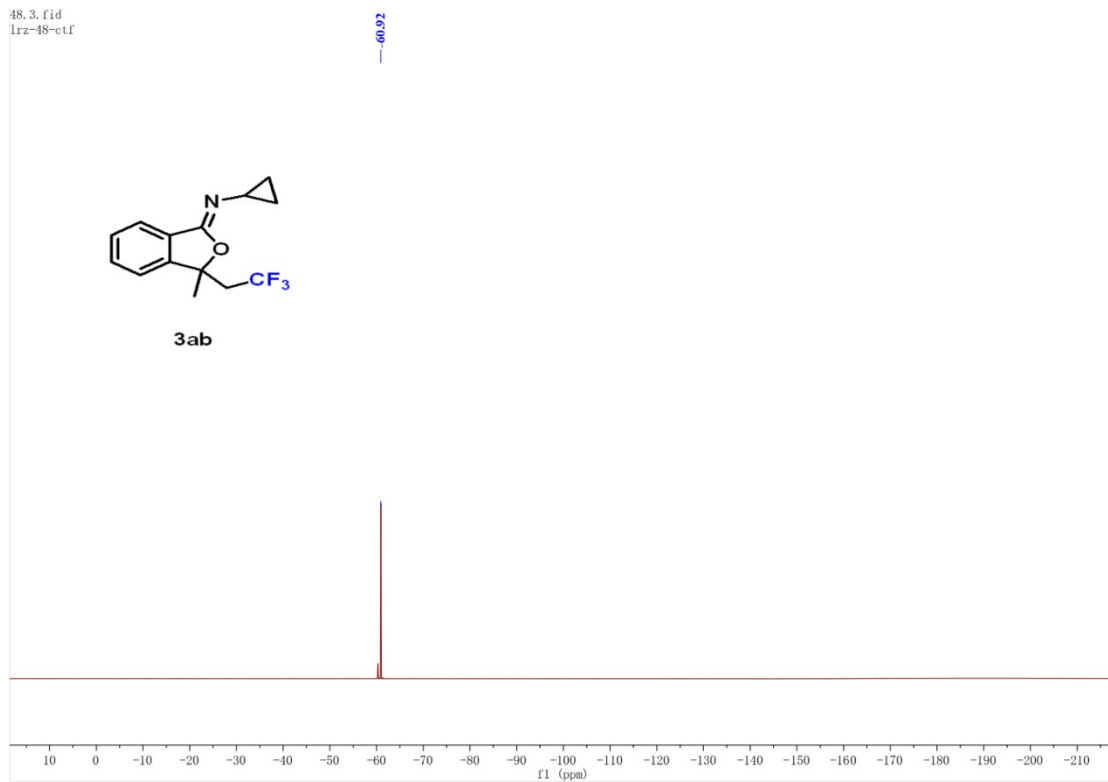

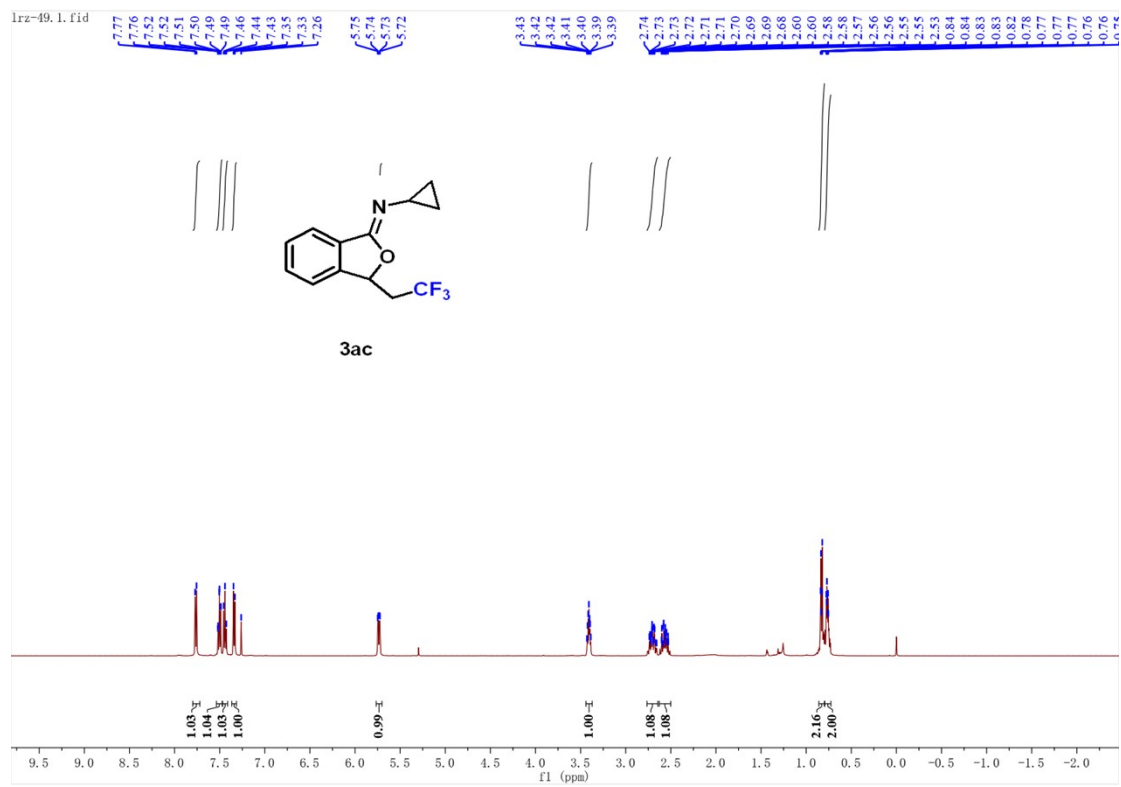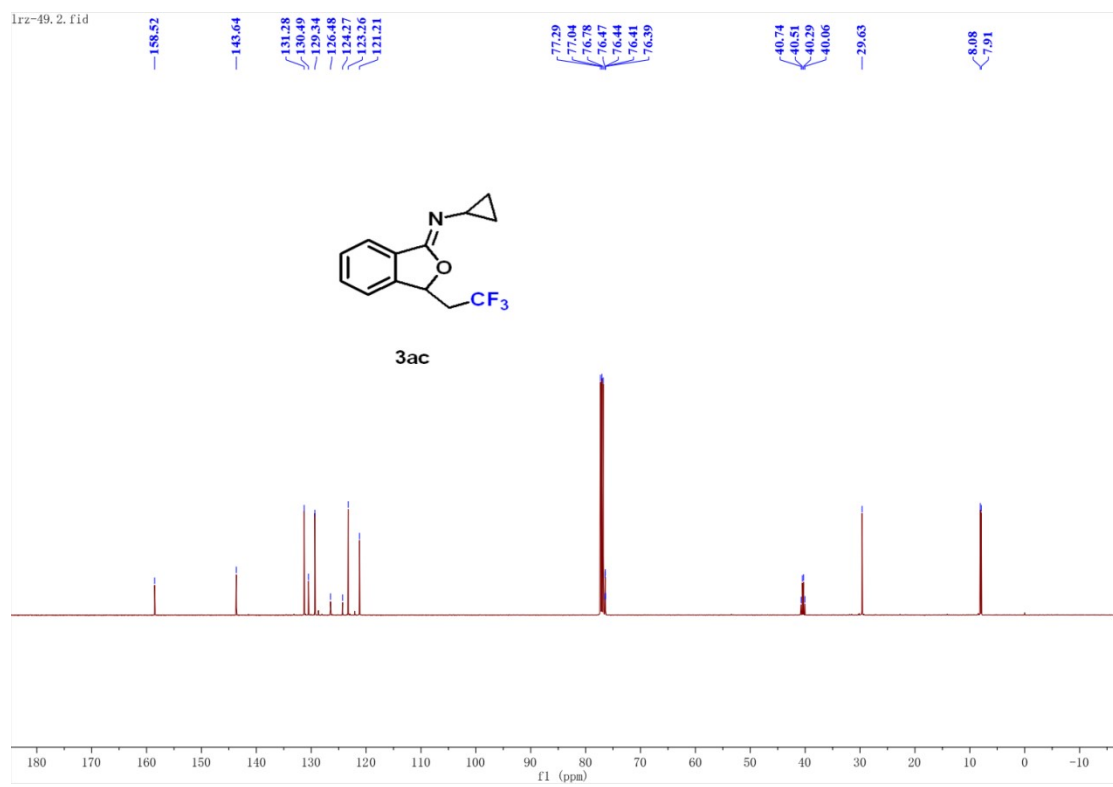



49.3.fid  
lrz-49-ctf

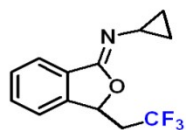

3ac

-63.72

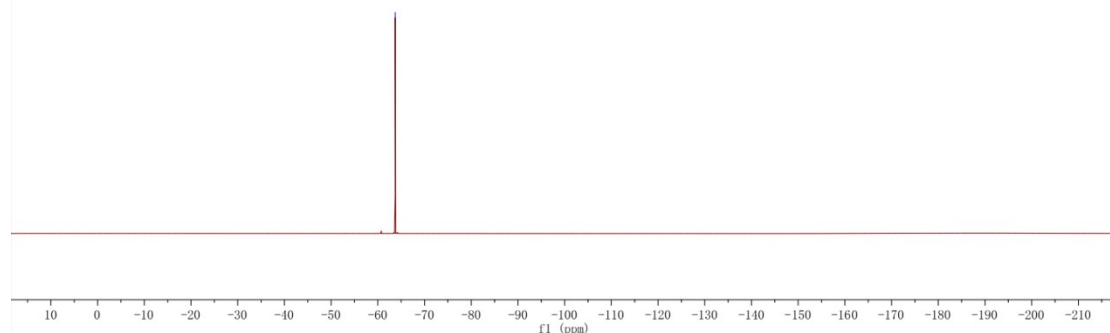

7.86  
7.84  
7.84  
7.74  
7.72  
7.66  
7.26  
5.79  
5.78  
5.77  
5.76  
3.41  
3.40  
3.39  
3.39  
3.38  
2.75  
2.73  
2.72  
2.71  
2.70  
2.69  
2.68  
2.67  
2.66  
2.66  
2.64  
2.63  
1.61  
1.31  
1.30  
1.28  
1.26  
-0.90  
-0.89  
-0.89  
-0.88  
-0.87  
-0.86  
-0.86  
-0.85  
-0.85  
-0.83  
-0.82  
-0.81  
-0.81  
-0.80  
-0.79  
-0.78  
-0.78

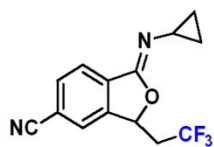

3ad

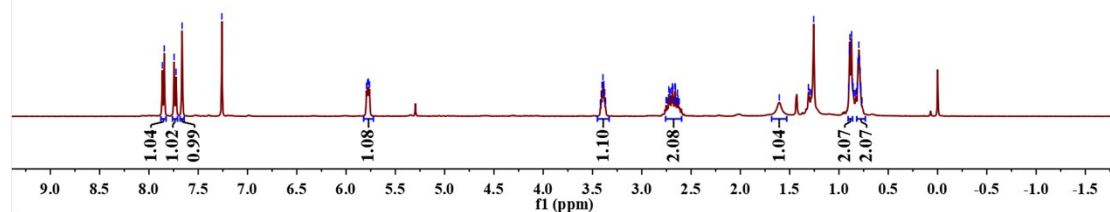

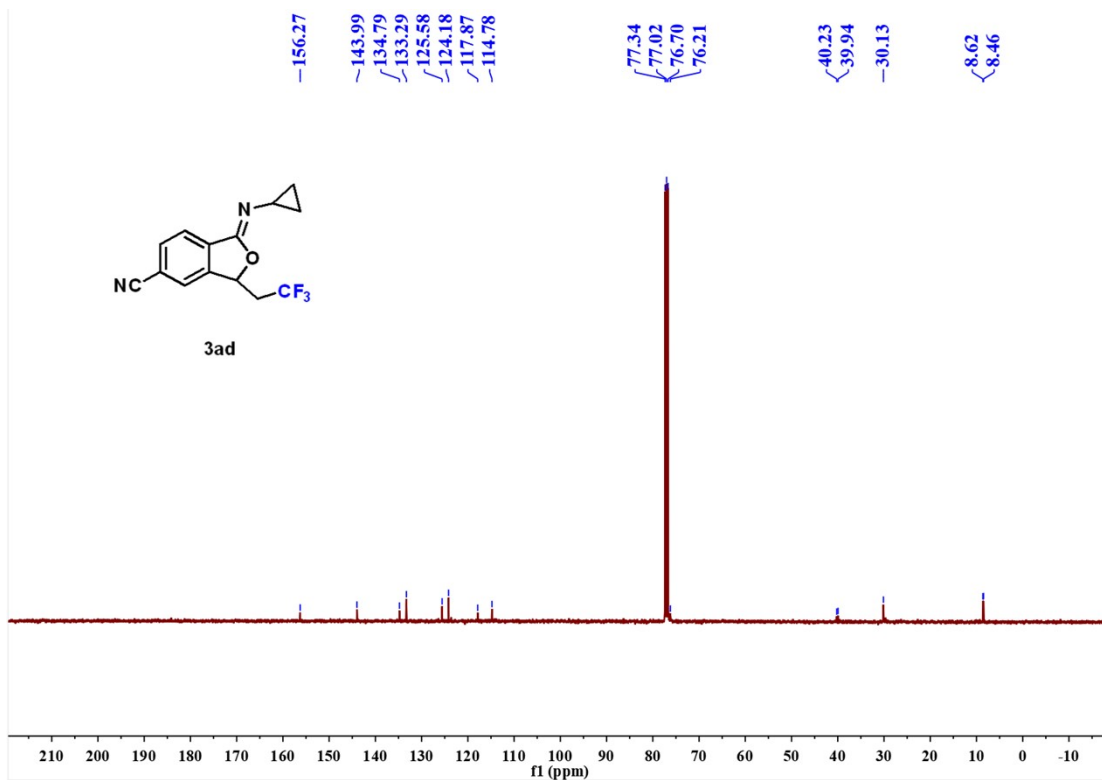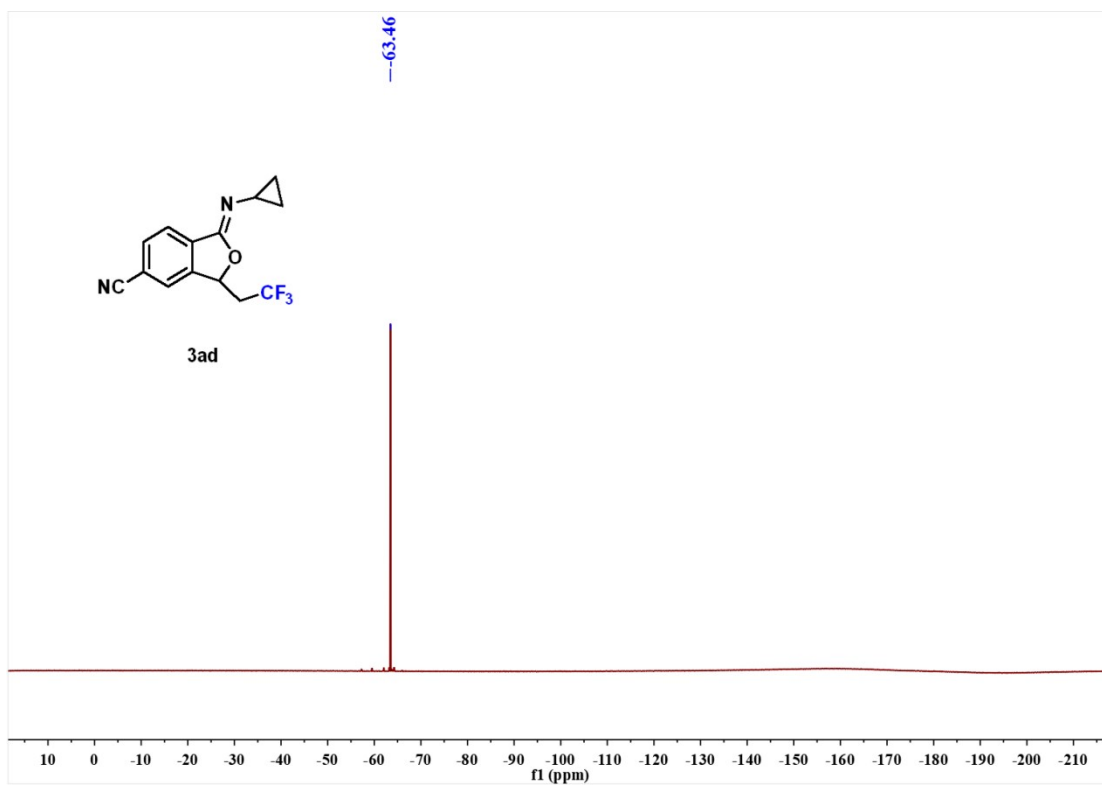

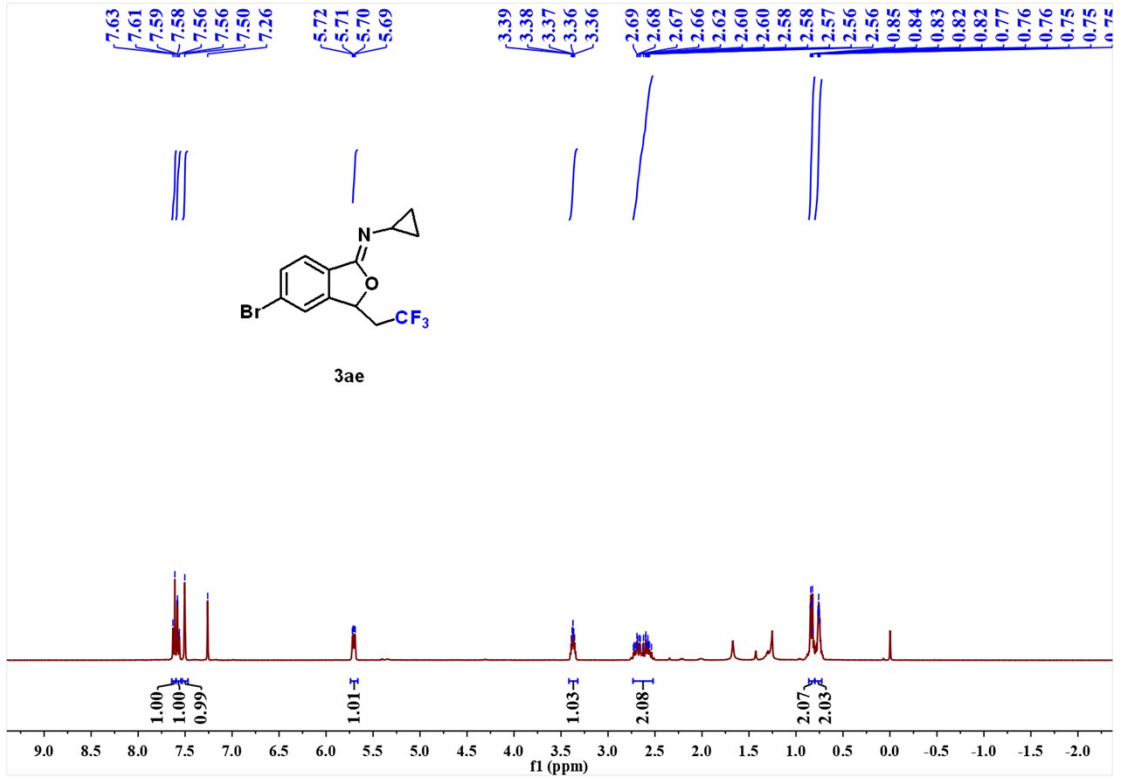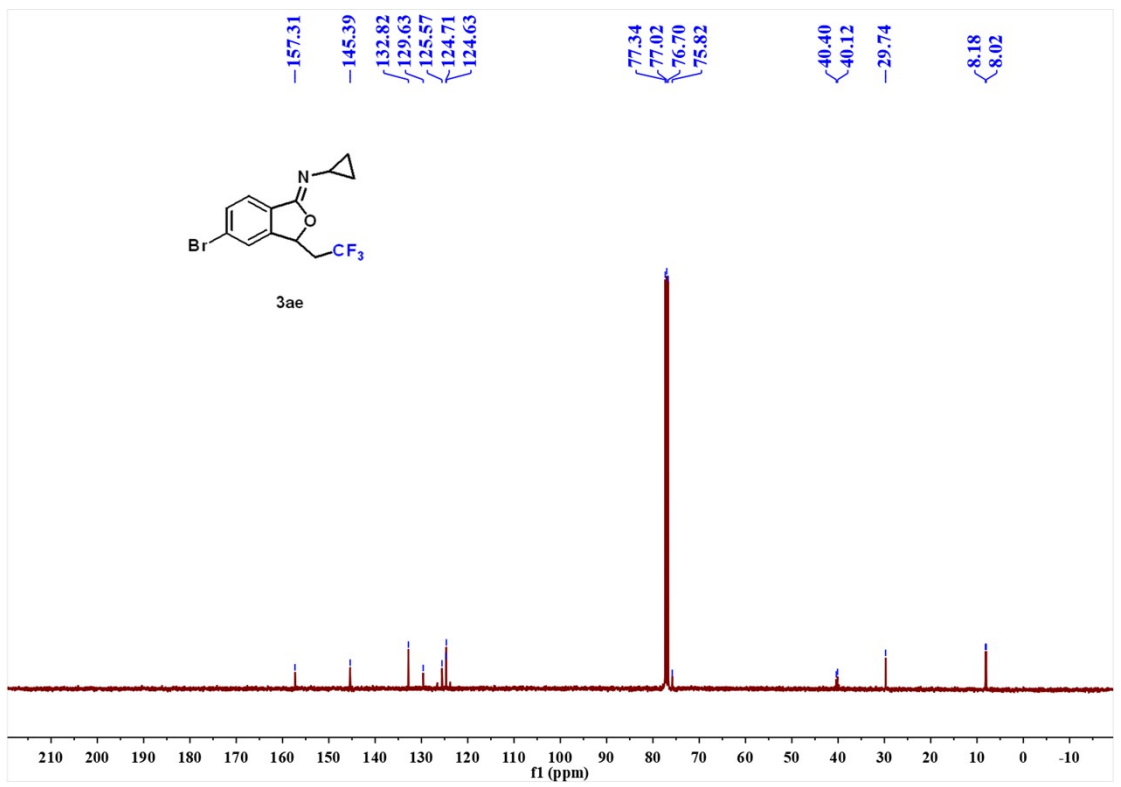

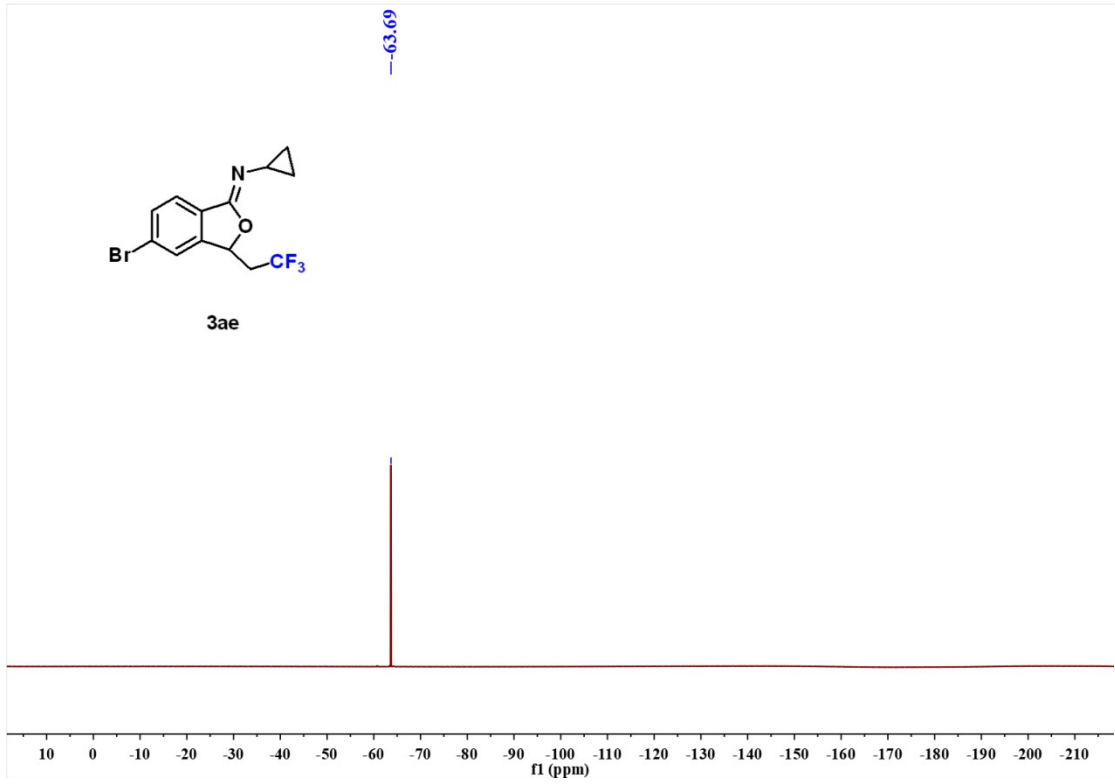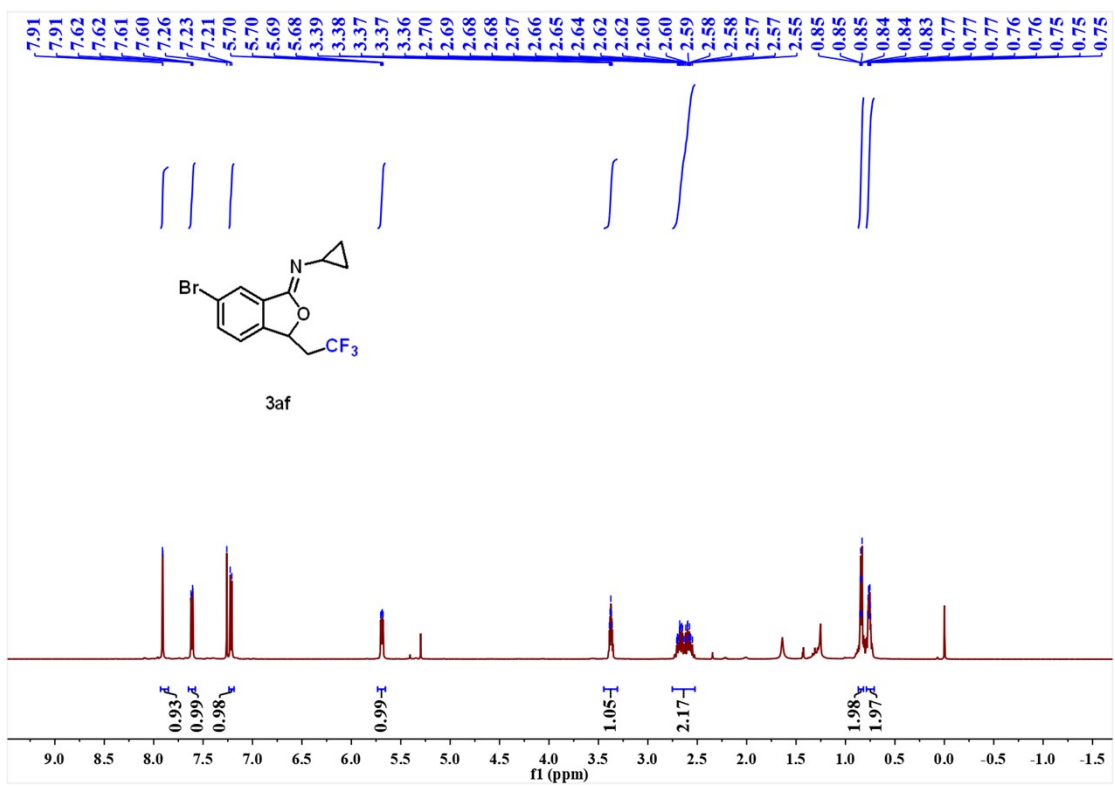

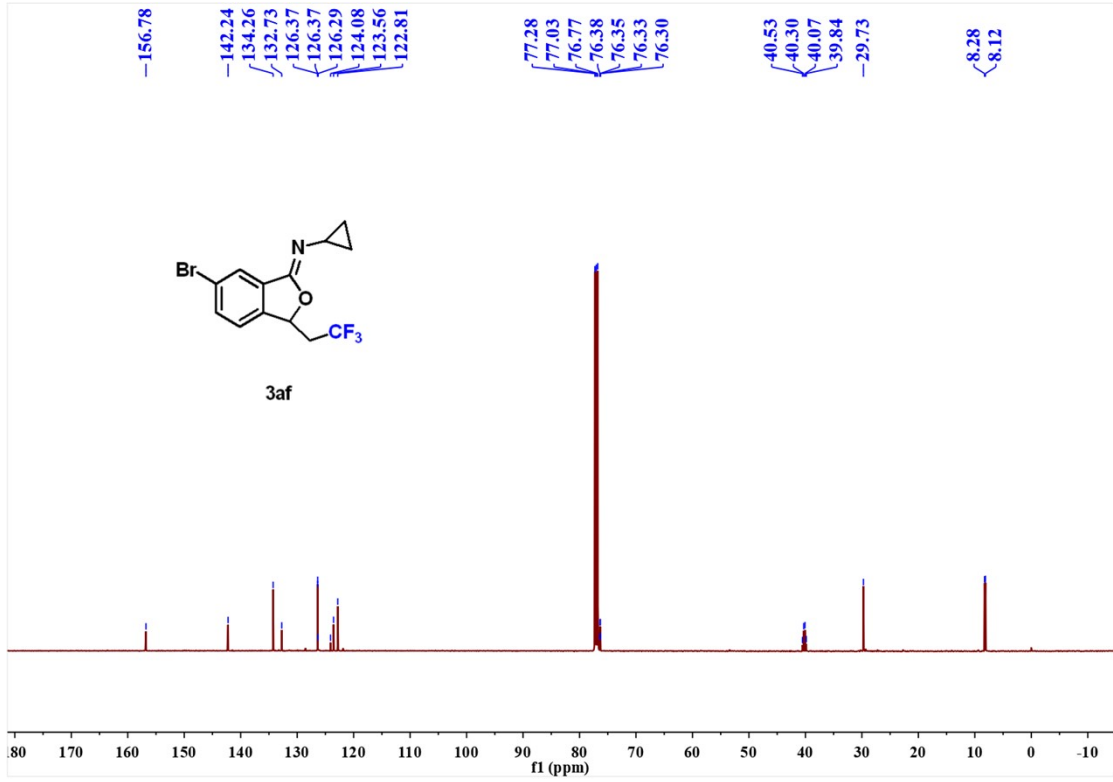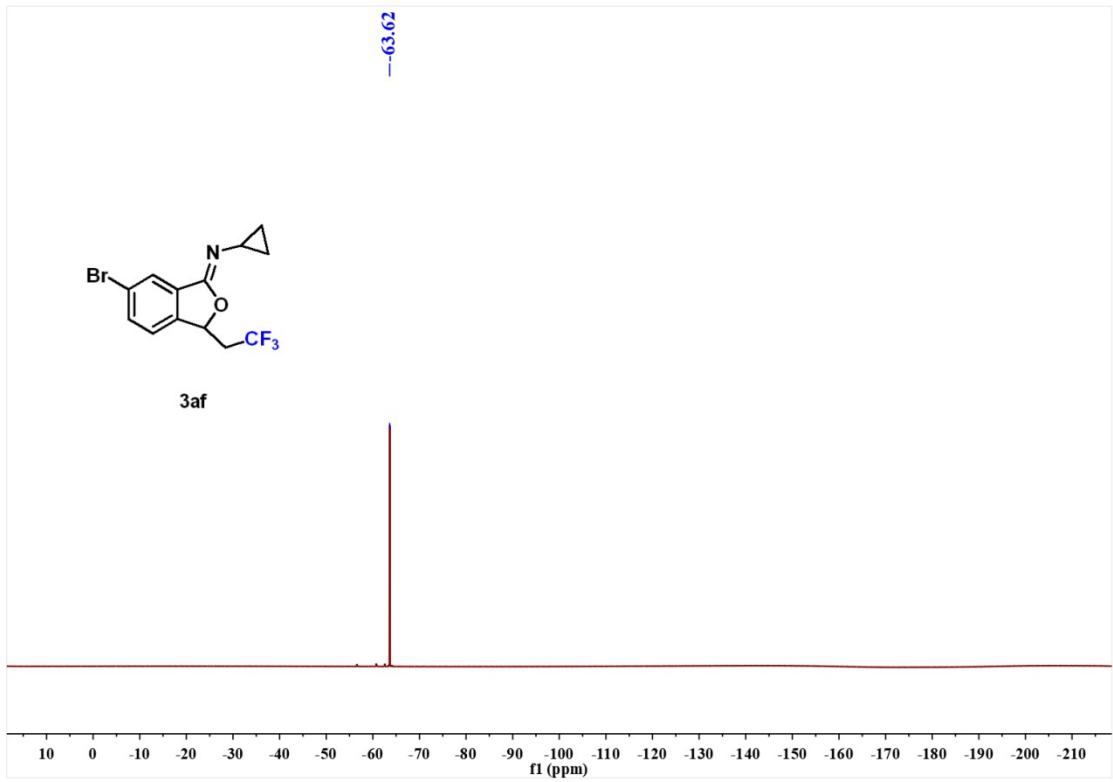

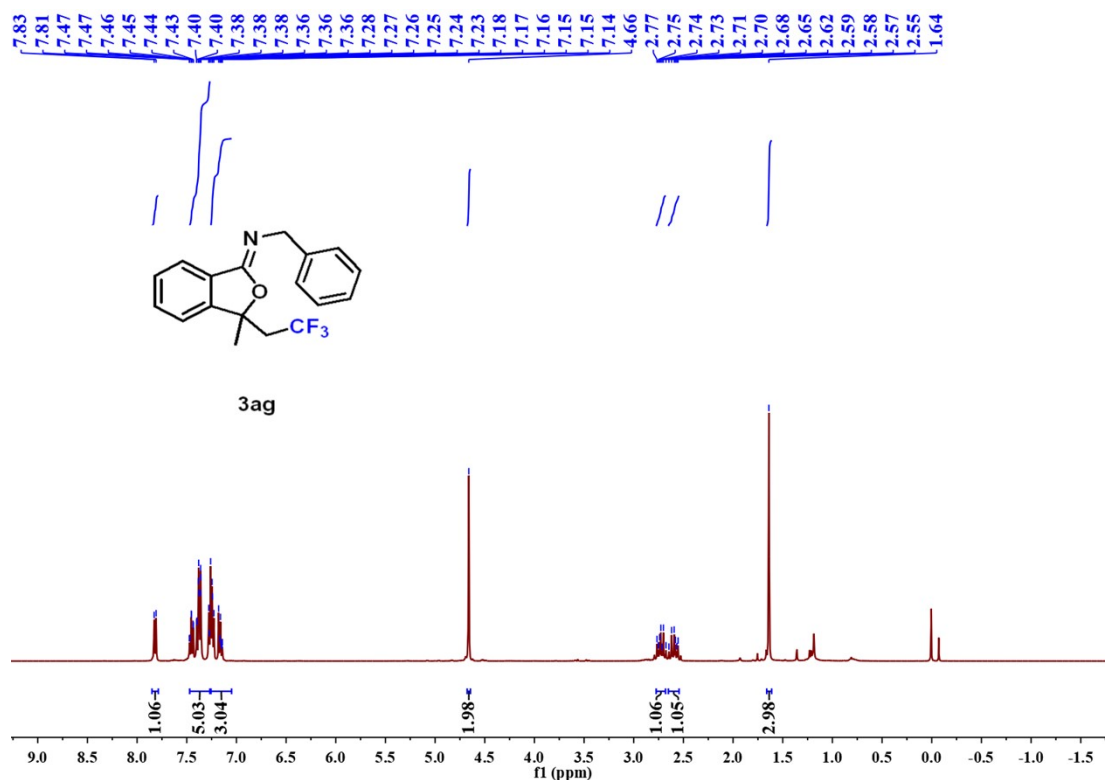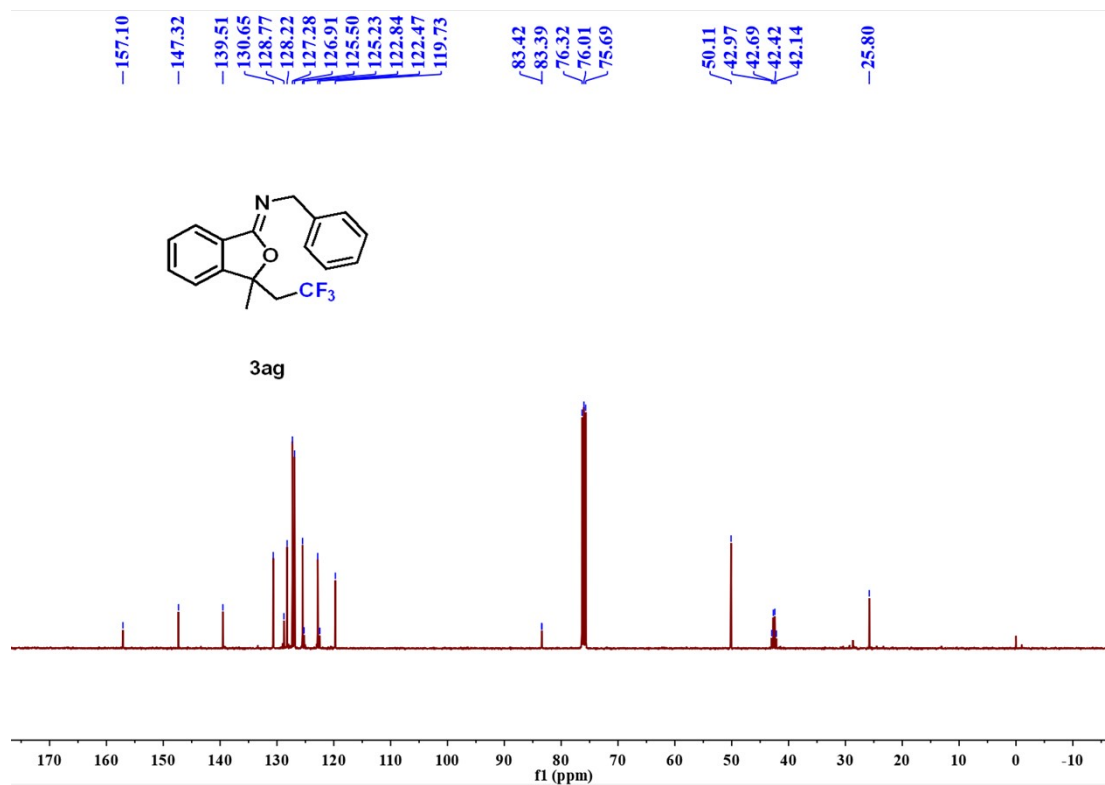

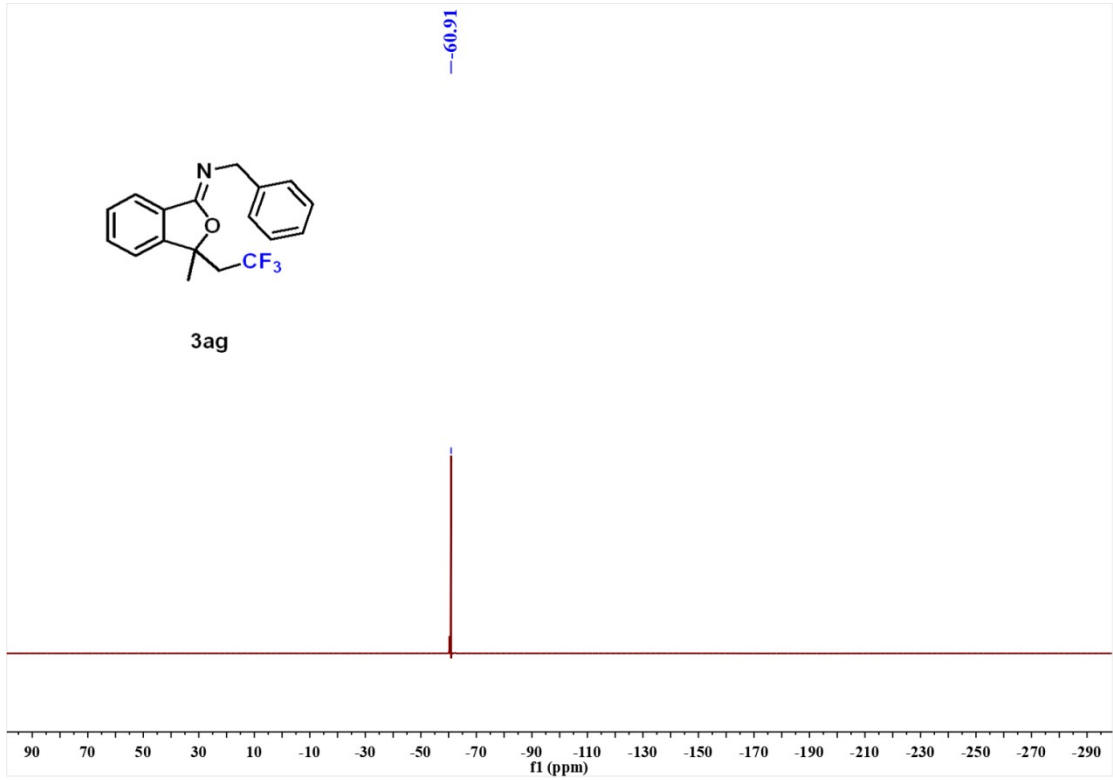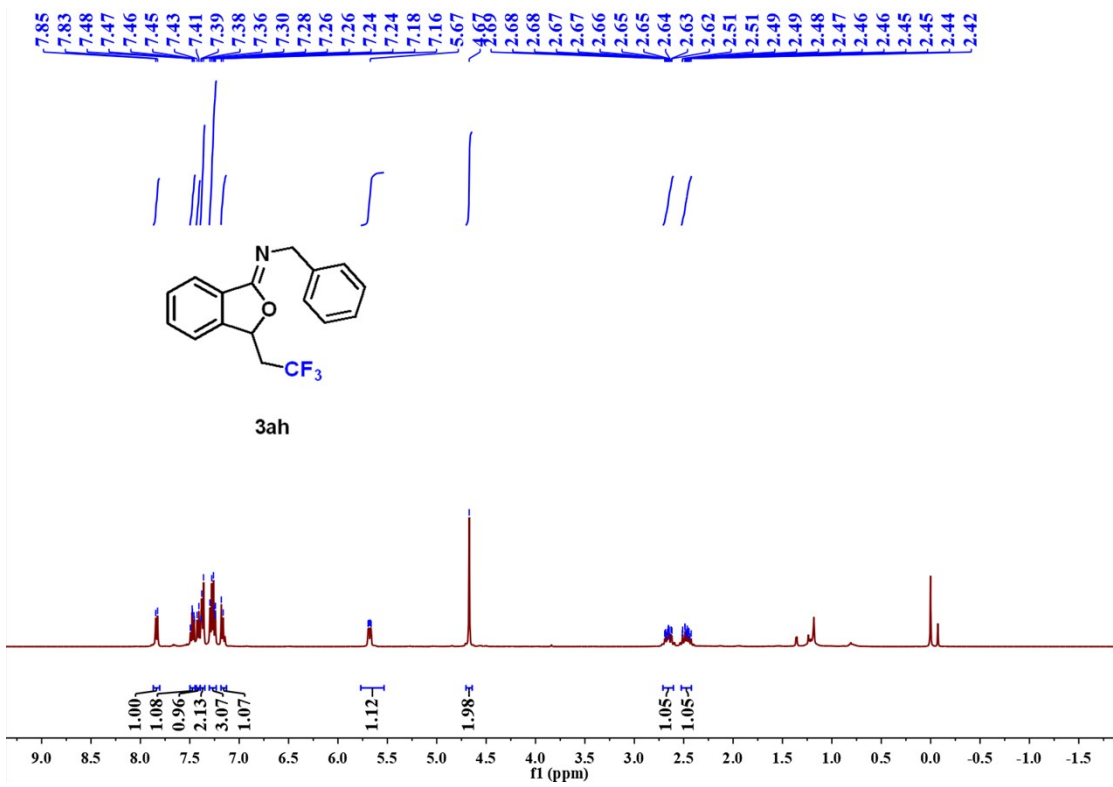

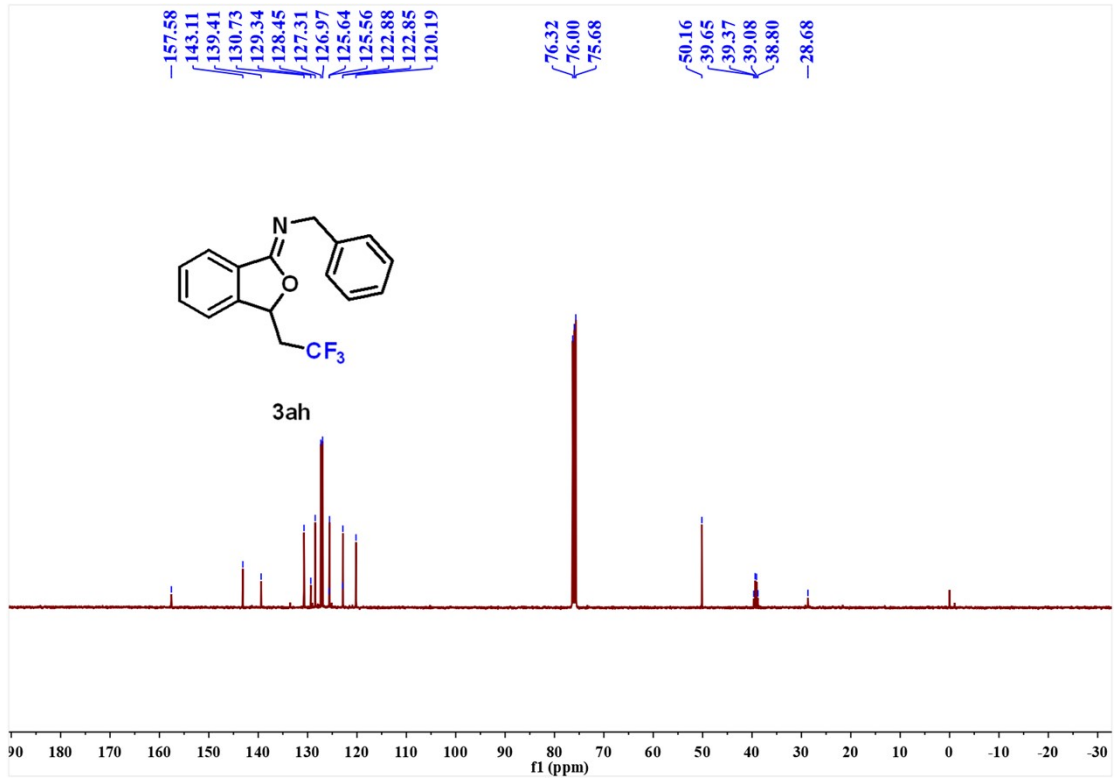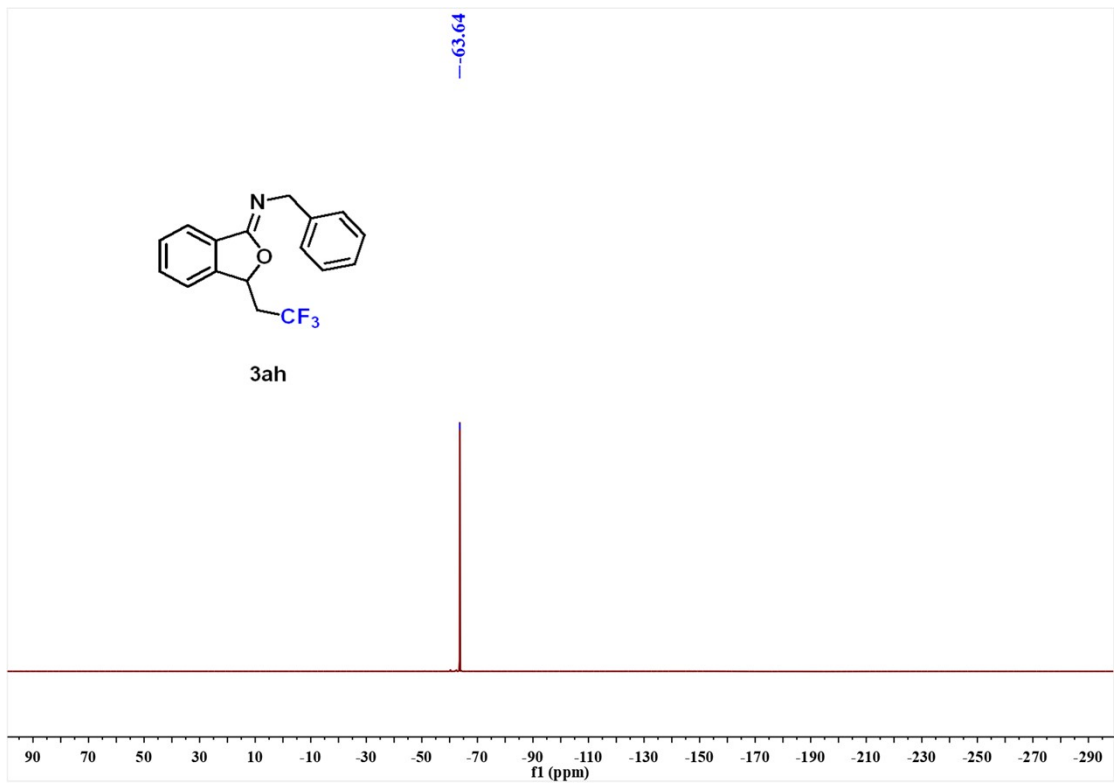



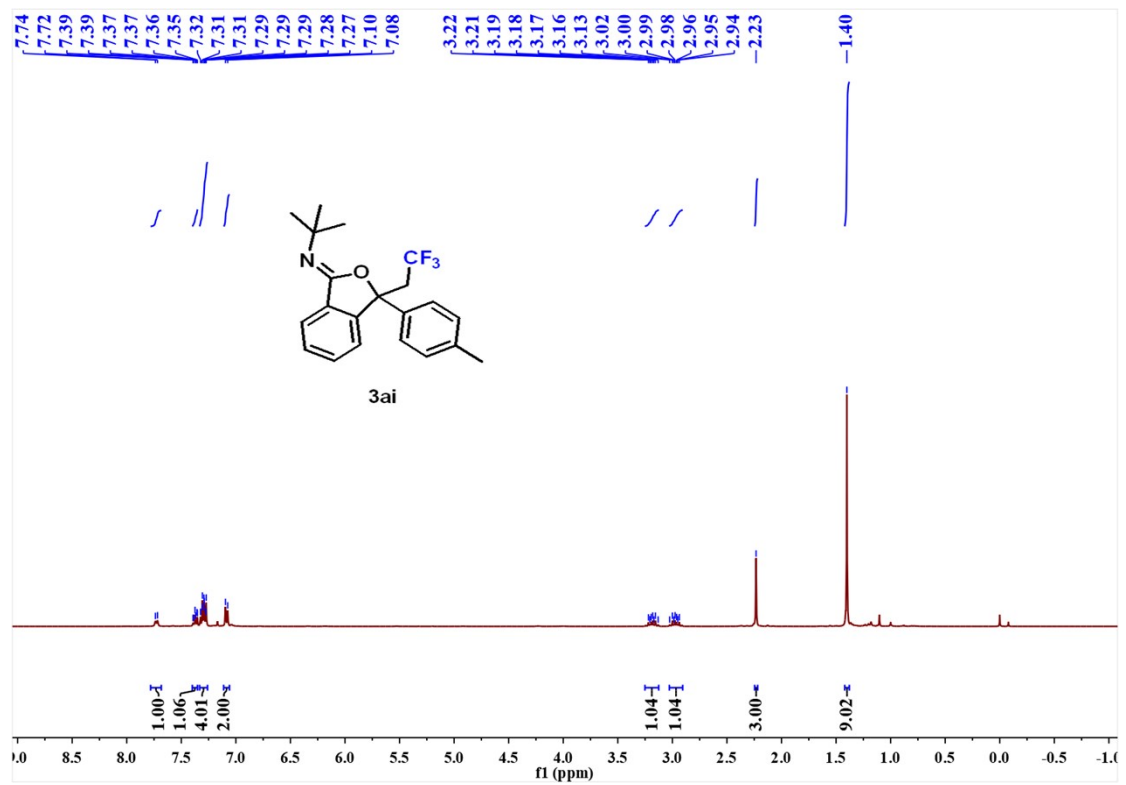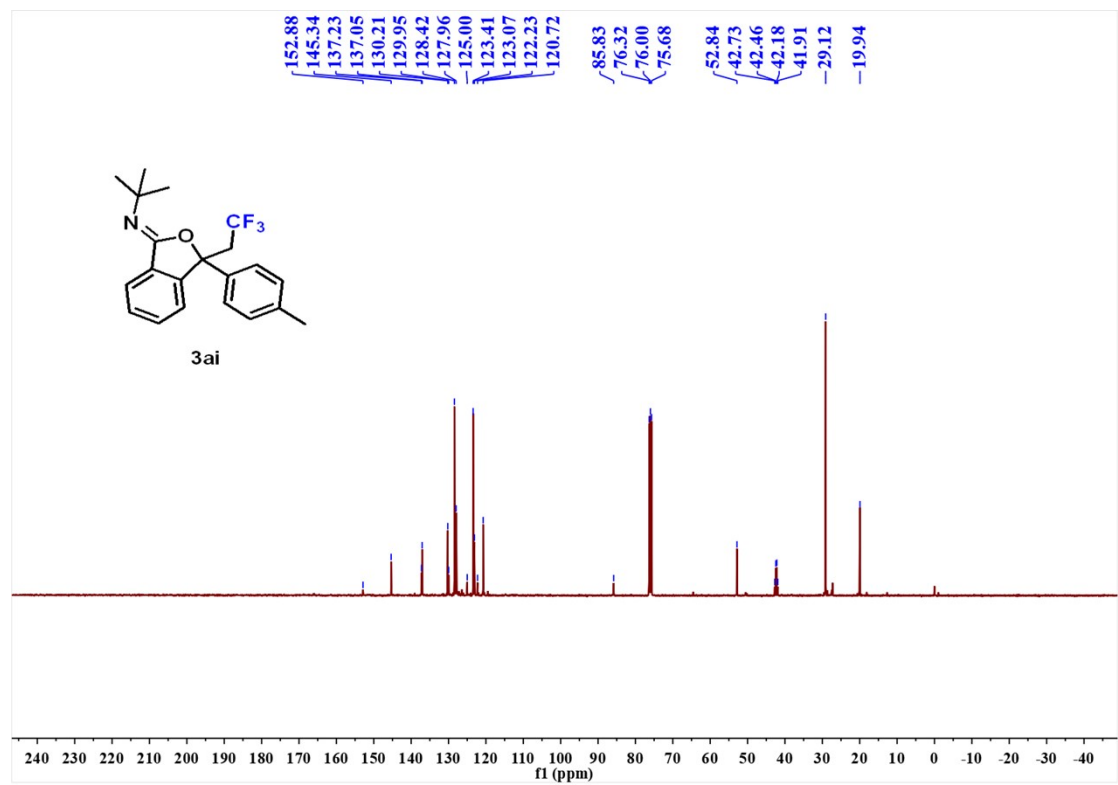

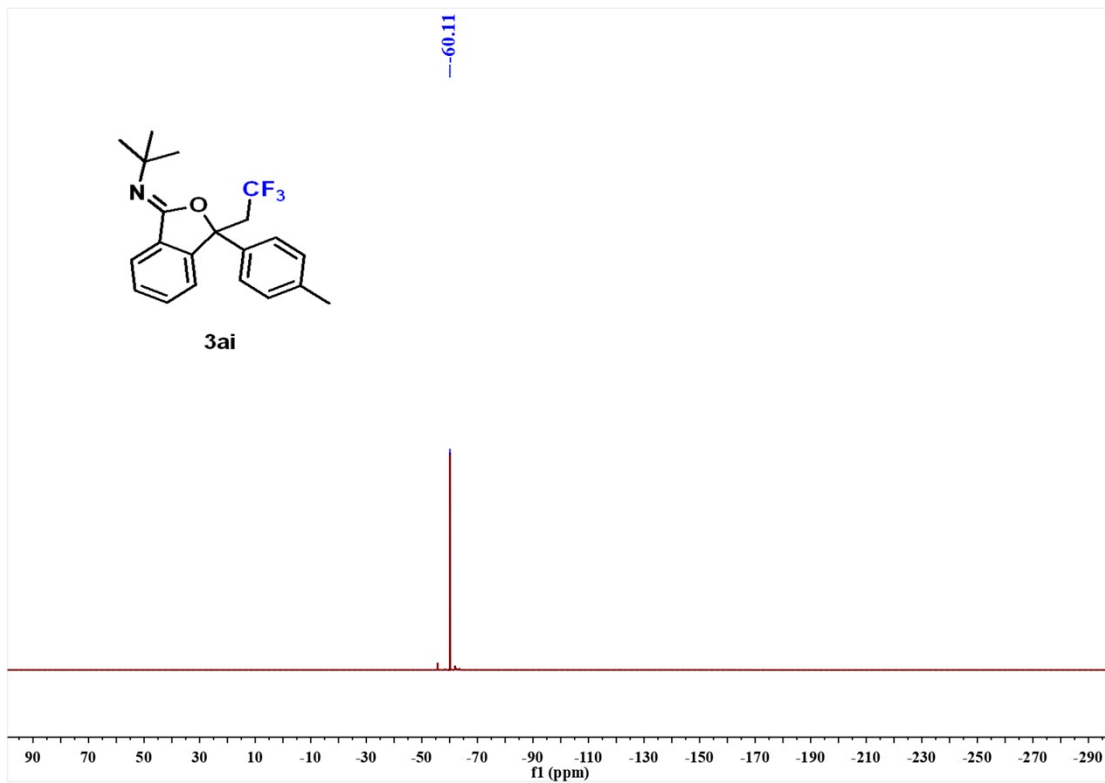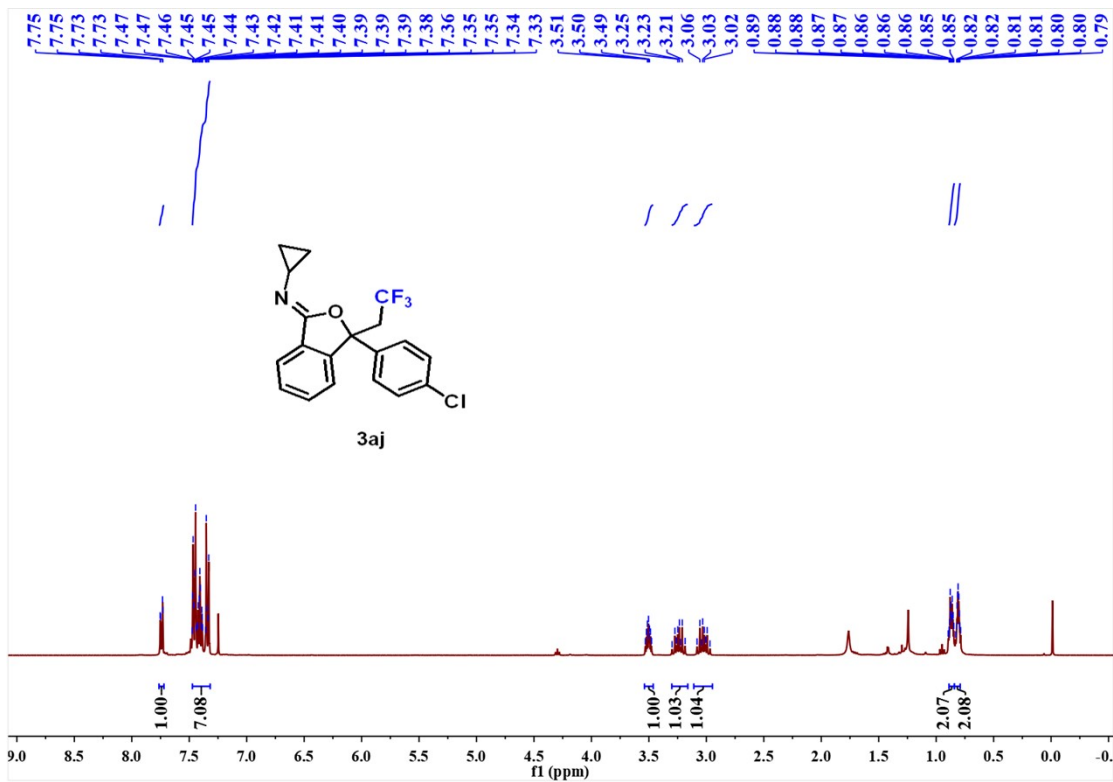

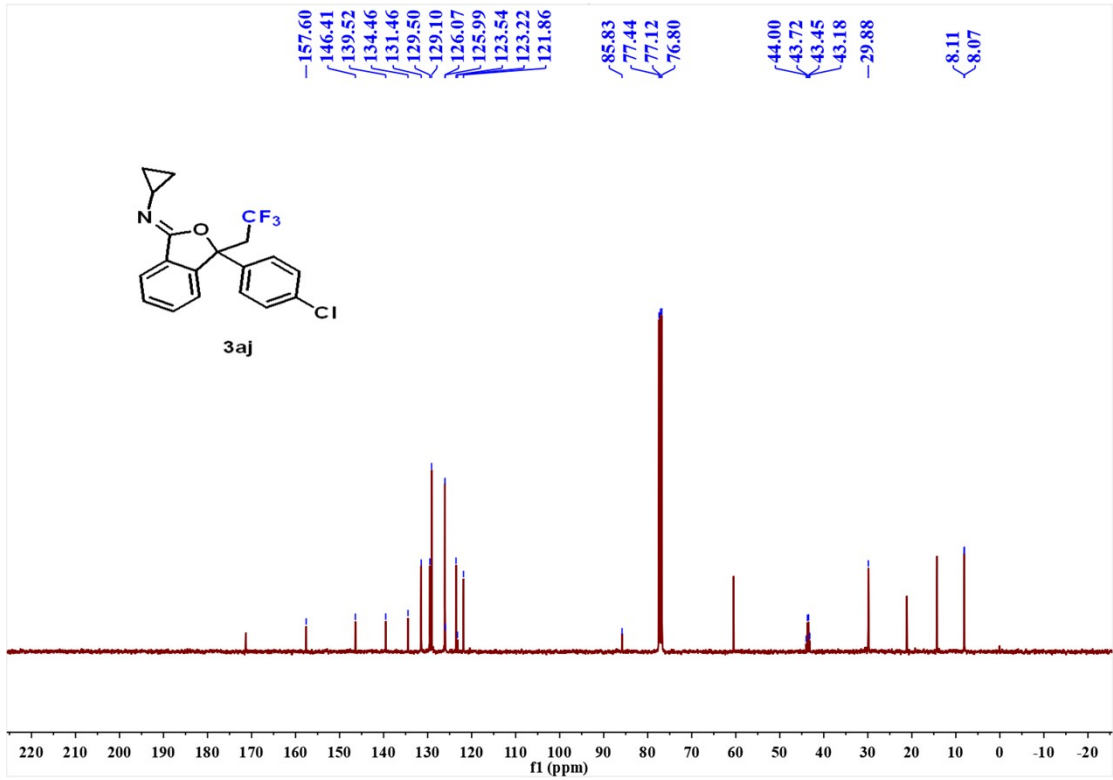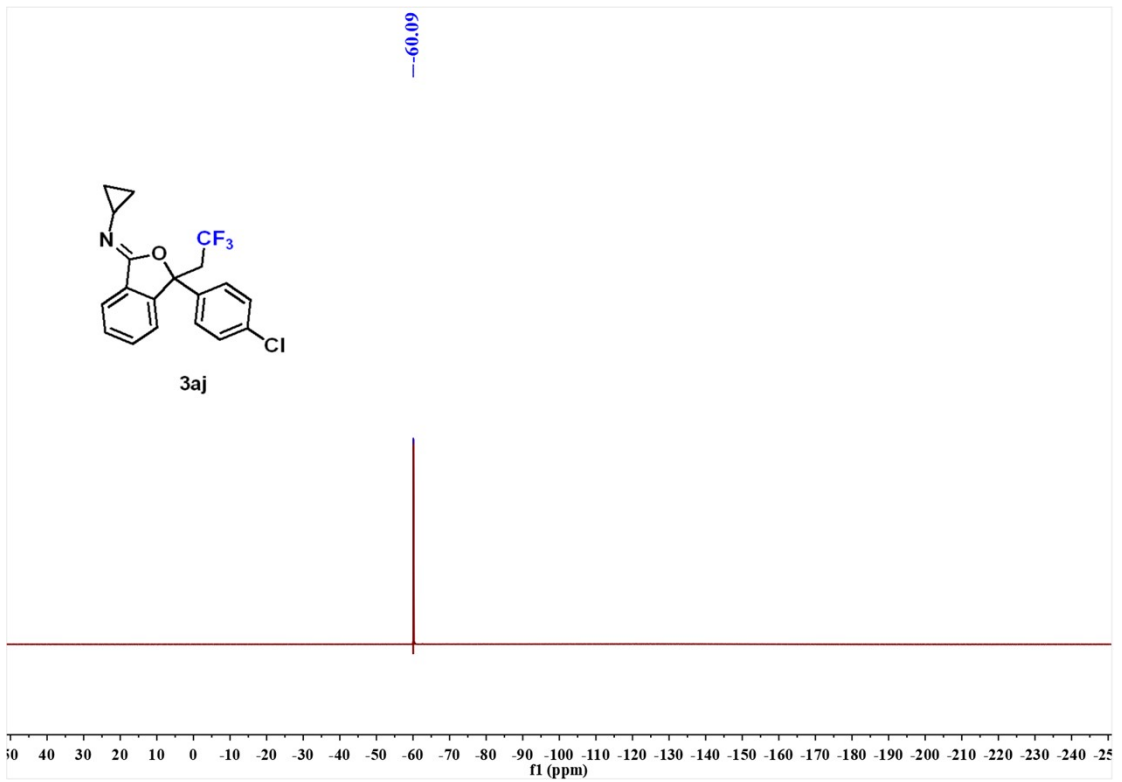

Supplement: d4ra07978g1.pdf [file d4ra07978g1.pdf]
